# Supplementary material for: HIF-1α-Dependent Metabolic Reprogramming, Oxidative Stress, and Bioenergetic Dysfunction in SARS-CoV-2-Infected Hamsters
Source: MDPI journal article supplement (doi:10.3390/ijms24010558), 2022-12-29
Supplement: s1 [file s1]

**Supplemental Results:****Supplemental Table S4**

Signaling pathways altered by SARS-CoV-2 in hamsters. KEGG pathways shown were observed from using the list of proteins with up or downward relative abundance having a P-value < 0.05 and  $\geq 3$  proteins. Protein abbreviations correspond to UniProt gene names.

| <b>Up-regulated Protein Pathways<br/>by SARS-CoV-2</b>   | <b>Proteins</b>                       | <b>P-value</b> |
|----------------------------------------------------------|---------------------------------------|----------------|
| Complement and coagulation<br>cascades                   | VTN, FGA, FGG, KNG1                   | 8.8E-6         |
| Platelet activation                                      | FGA, FGG, GNAI2                       | 9.2E-4         |
| Pathways in cancer                                       | GSTM3, KNG1, GNAI2                    | 0.048          |
| <b>Down-regulated Protein<br/>Pathways by SARS-CoV-2</b> | <b>Proteins</b>                       | <b>P-value</b> |
| Alzheimer's disease                                      | PSMA2, GAPDH, SLC25A4,<br>PSMA7, RTN4 | 2.0E-4         |
| Parkinson's disease                                      | HSPA5, PSMA2, SLC25A4,<br>PSMA7       | 5.0E-4         |
| Prion disease                                            | HSPA5, PSMA2, SLC25A4,<br>PSMA7       | 7.0E-4         |
| Spinocerebellar ataxia                                   | PSMA2, SLC25A4, PSMA7                 | 0.001          |
| Pathways of neurodegeneration                            | HSPA5, PSMA2, SLC25A4,<br>PSMA7       | 0.005          |
| Huntington's disease                                     | PSMA2, SLC25A4, PSMA7                 | 0.011          |
| Amyotrophic lateral sclerosis                            | HSPA5, PSMA2, PSMA7                   | 0.017          |

## Supplemental Figures:

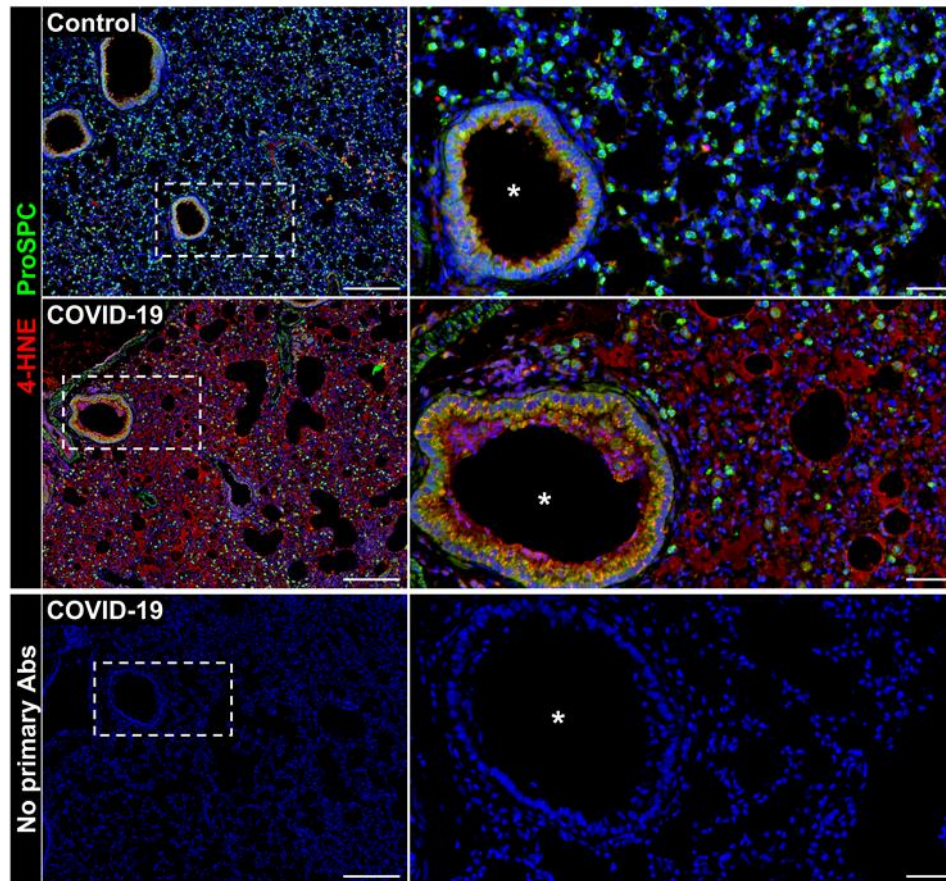

### Supplemental Figure S1. Increased 4-HNE deposition in SARS-CoV-2-infected lungs.

Double immunofluorescence imaging of 4-HNE (end-product of lipid peroxidation) and ProSPC in lung sections from an uninfected hamster (control) and a SARS-CoV-2-infected hamster at 4 dpi. Control sections show a normal distribution of ProSPC-positive AT2 cells and minimal 4-HNE staining. Infected lungs show extensive 4-HNE deposition in damaged epithelial areas with loss of ProSPC-expressing AT2 cells and in the cellular debris found along the inner lining of bronchioles. No primary antibody experiments showed negative staining in the same infected lung section. Scale bars: 250  $\mu$ m, 10  $\mu$ m (magnified panels); \* denotes the lumen of a bronchiole.

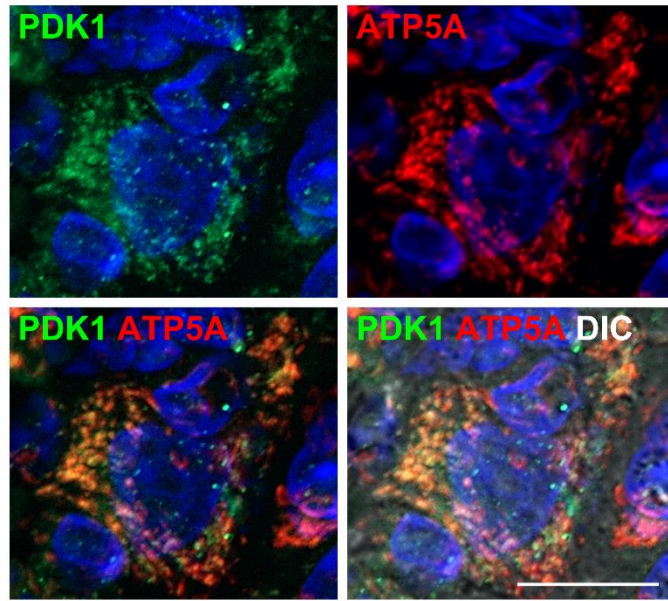

**Supplemental Figure S2. Mitochondrial localization of PDK1.** Double immunofluorescence imaging of PDK1 and the mitochondrial marker ATP5A in lung sections from a SARS-CoV-2-infected hamster at 4 dpi. Nuclei were counterstained with Hoechst 33342 (blue). Scale bars: 10  $\mu$ m. DIC = differential interference contrast.

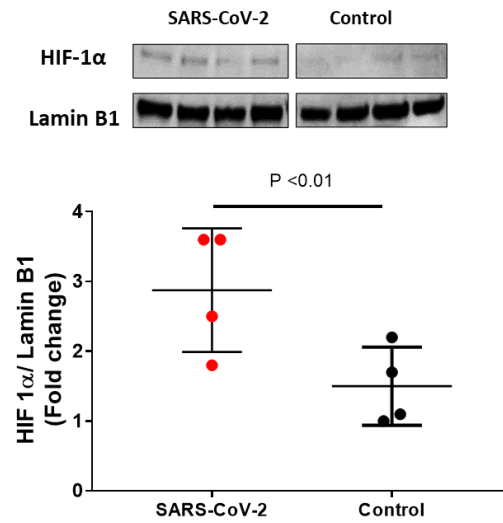

**Supplemental Figure S3. Densitometric analysis for relative expression of HIF-1α.**

Immunoblotting showing HIF-1α expression in nuclear extracts from lung tissue lysates of SARS-CoV-2 infected and non-infected hamsters (upper panel) and Lamin B1 as loading control (lower panel). Densitometry was done by BioRad Image Lab 5.2.1 software.

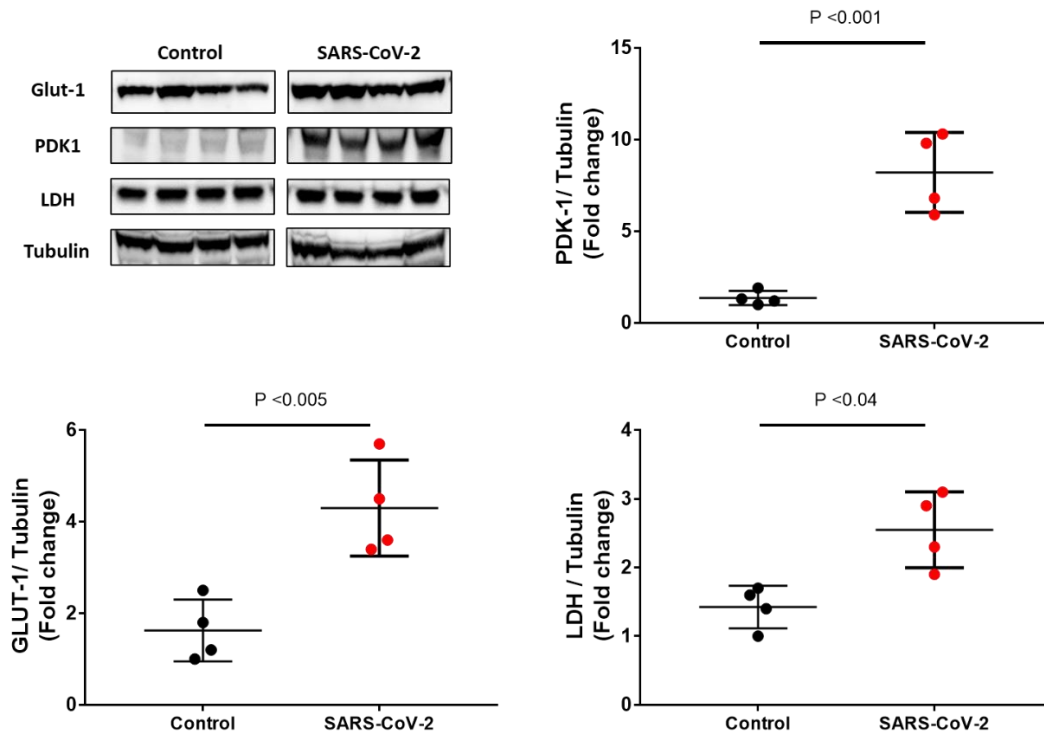

**Supplemental Figure S4. Densitometric analyses for relative expressions of Glut-1, PDK1 and LDH.** Immunoblotting showing Glut-1, PDK1 and LDH levels in total lung homogenates of SARS-CoV-2 infected and non-infected hamsters. Equal protein loading was confirmed by probing with anti-tubulin antibody (lower panel). Densitometric analyses for relative expression of Glut-1, PDK1, LDH were done by BioRad Image Lab 5.2.1 software.
