# Supplementary material for: HIF-1α-Dependent Metabolic Reprogramming, Oxidative Stress, and Bioenergetic Dysfunction in SARS-CoV-2-Infected Hamsters
Source: Int J Mol Sci. 2022 Dec 29;24(1):558. doi: 10.3390/ijms24010558 (PMC9820273; doi:10.3390/ijms24010558)
Supplement: Supplementary file 1 [file ijms-24-00558-s001.zip]

Archive with 4 entries (4 files):
- Supplemental Table 1.xlsx
- Supplemental Table 2.xlsx
- Supplemental Table 3.xlsx
- Supplementary material.pdf
