# Supplementary material for: HIF-1α-Dependent Metabolic Reprogramming, Oxidative Stress, and Bioenergetic Dysfunction in SARS-CoV-2-Infected Hamsters
Source: Int J Mol Sci. 2022 Dec 29;24(1):558. doi: 10.3390/ijms24010558 (PMC9820273; doi:10.3390/ijms24010558)
Supplement: Supplementary file 1 [file ijms-24-00558-s001.zip › Supplemental Table 1.xlsx]

## Sheet: Sheet1
Protein	# Peptides Quantified	Avg Ratio (infected/control)	P-value	Accession	Species	Hyperlink	Gene	Subcellular Location	Function	Comments
Septin	3	0	2.1523e-05	A0A1U8C353	Custom	http://www.uniprot.org/uniprot/A0A1U8C353	44441	Cell projection	Filament-forming cytoskeletal GTPase.
Glutathione transferase (Fragment)	2	0	6.29997e-05	E2GMU9	Custom	http://www.uniprot.org/uniprot/E2GMU9
collagen alpha-1(X) chain	2	#DIV/0!	0.000266615	A0A1U8C6Q8	Custom	http://www.uniprot.org/uniprot/A0A1U8C6Q8	Col10a1
RNA-binding protein 33 isoform X4	2	0	0.000302587	A0A1U8CUS8	Custom	http://www.uniprot.org/uniprot/A0A1U8CUS8	Rbm33
Proteasome subunit alpha type	2	0	0.000507761	A0A1U7QGL6	Custom	http://www.uniprot.org/uniprot/A0A1U7QGL6	Psma2	Cytoplasm
band 4.1-like protein 2 isoform X18	1	0	0.000590306	A0A3Q0CG92	Custom	http://www.uniprot.org/uniprot/A0A3Q0CG92	Epb41l2
inter-alpha-trypsin inhibitor heavy chain H1-like	5	#DIV/0!	0.000810411	A0A3Q0DHA7	Custom	http://www.uniprot.org/uniprot/A0A3Q0DHA7	LOC106022424
Glutathione S-transferase	2	#DIV/0!	0.000880459	A0A1U7QZZ0	Custom	http://www.uniprot.org/uniprot/A0A1U7QZZ0	Gstm3	Cytoplasm
apolipoprotein E	2	#DIV/0!	0.000903634	A0A1U7QUL7	Custom	http://www.uniprot.org/uniprot/A0A1U7QUL7	Apoe	Secreted
RNA helicase	3	#DIV/0!	0.0010503	A0A1U8BV28	Custom	http://www.uniprot.org/uniprot/A0A1U8BV28	Eif4a1
ADP/ATP translocase	3	0	0.00108522	A0A1U7QFU8	Custom	http://www.uniprot.org/uniprot/A0A1U7QFU8	Slc25a4	Membrane	Catalyzes the exchange of ADP and ATP across the membrane.
Sorting nexin	2	0	0.00108983	A0A3Q0CPZ2	Custom	http://www.uniprot.org/uniprot/A0A3Q0CPZ2	Snx5		Involved in several stages of intracellular trafficking.
Myxovirus resistance protein 2	12	#DIV/0!	0.00114406	B2Z890	Custom	http://www.uniprot.org/uniprot/B2Z890	Mx2
15-hydroxyprostaglandin dehydrogenase [NAD(+)]	2	#DIV/0!	0.00114943	A0A3Q0CYX1	Custom	http://www.uniprot.org/uniprot/A0A3Q0CYX1	Hpgd
Amine oxidase	7	0.195615	0.00169277	A0A1U8BZE7	Custom	http://www.uniprot.org/uniprot/A0A1U8BZE7	LOC101827582
phosphoglucomutase-like protein 5	4	0	0.00188618	A0A1U7QB05	Custom	http://www.uniprot.org/uniprot/A0A1U7QB05	Pgm5
Formylglycinamide ribonucleotide amidotransferase	3	0	0.00192989	A0A1U7Q494	Custom	http://www.uniprot.org/uniprot/A0A1U7Q494	Pfas
Superoxide dismutase	4	#DIV/0!	0.00197689	A0A1U7QH60	Custom	http://www.uniprot.org/uniprot/A0A1U7QH60	Sod2	Mitochondrion matrix	Destroys radicals which are normally produced within the cells and which are toxic to biological systems.
Podocalyxin	2	0	0.00232817	A0A1U8CYQ4	Custom	http://www.uniprot.org/uniprot/A0A1U8CYQ4	Podxl	Apical cell membrane	Involved in the regulation of both adhesion and cell morphology and cancer progression. Functions as an anti-adhesive molecule that maintains an open filtration pathway between neighboring foot processes in the podocyte by charge repulsion. Acts as a pro-adhesive molecule, enhancing the adherence of cells to immobilized ligands, increasing the rate of migration and cell-cell contacts in an integr…
Inositol-1-monophosphatase	2	#DIV/0!	0.00251391	A0A1U7QIL1	Custom	http://www.uniprot.org/uniprot/A0A1U7QIL1	Impa1
sickle tail protein homolog isoform X16	2	0	0.00297572	A0A1U8CEZ0	Custom	http://www.uniprot.org/uniprot/A0A1U8CEZ0	Kiaa1217
myosin light polypeptide 6 isoform X2	4	#DIV/0!	0.00315033	A0A1U7QV29	Custom	http://www.uniprot.org/uniprot/A0A1U7QV29	Myl6
keratin, type I cytoskeletal 19 isoform X2	1	#DIV/0!	0.00359292	A0A3Q0CFZ2	Custom	http://www.uniprot.org/uniprot/A0A3Q0CFZ2	Krt19
transmembrane protein 132A isoform X2	1	#DIV/0!	0.00371932	A0A1U7Q4S7	Custom	http://www.uniprot.org/uniprot/A0A1U7Q4S7	Tmem132a	Membrane
Protein S100	2	3.48493	0.00400643	A0A1U7R695	Custom	http://www.uniprot.org/uniprot/A0A1U7R695	S100a11		Facilitates the differentiation and the cornification of keratinocytes.
Reticulon	3	0	0.00408839	A0A1U7QE52	Custom	http://www.uniprot.org/uniprot/A0A1U7QE52	Rtn4	Endoplasmic reticulum membrane
Rab GDP dissociation inhibitor	2	0.070222	0.00480275	A0A1U7QDS7	Custom	http://www.uniprot.org/uniprot/A0A1U7QDS7	Gdi2	Cytoplasm	Regulates the GDP/GTP exchange reaction of most RAB proteins by inhibiting the dissociation of GDP from them, and the subsequent binding of GTP.
guanylate-binding protein 5	2	#DIV/0!	0.00498008	A0A1U8CCZ4	Custom	http://www.uniprot.org/uniprot/A0A1U8CCZ4	LOC106022099
Fatty acid binding protein 4 (Fragment)	4	#DIV/0!	0.00580766	Q5UCA1	Custom	http://www.uniprot.org/uniprot/Q5UCA1	FABP4
Myoglobin	6	#DIV/0!	0.00601847	A0A1U7QU54	Custom	http://www.uniprot.org/uniprot/A0A1U7QU54	Mb		Serves as a reserve supply of oxygen and facilitates the movement of oxygen within muscles.
Glyceraldehyde-3-phosphate dehydrogenase (Fragment)	11	0.357973	0.00632279	Q0QET9	Custom	http://www.uniprot.org/uniprot/Q0QET9	GAPDH
WD repeat-containing protein 1	11	0.225529	0.00717033	A0A1U7QJG0	Custom	http://www.uniprot.org/uniprot/A0A1U7QJG0	Wdr1
protein SET	2	#DIV/0!	0.00727841	A0A1U7R6E4	Custom	http://www.uniprot.org/uniprot/A0A1U7R6E4	LOC101831694
guanine nucleotide-binding protein G(I) subunit alpha-2	4	#DIV/0!	0.00820876	A0A1U7QAT2	Custom	http://www.uniprot.org/uniprot/A0A1U7QAT2	Gnai2
78 kDa glucose-regulated protein	20	0.300026	0.0100003	A0A1U8CDJ8	Custom	http://www.uniprot.org/uniprot/A0A1U8CDJ8	Hspa5	Endoplasmic reticulum lumen
Adenosylhomocysteinase	10	0.0215711	0.0104422	A0A1U7RAJ1	Custom	http://www.uniprot.org/uniprot/A0A1U7RAJ1	Ahcy
four and a half LIM domains protein 1 isoform X4	9	0.203464	0.01055	A0A1U7R2T5	Custom	http://www.uniprot.org/uniprot/A0A1U7R2T5	Fhl1
Fibrinogen alpha chain	7	5.7917	0.0107337	A0A1U7QP17	Custom	http://www.uniprot.org/uniprot/A0A1U7QP17	Fga	Secreted
retinal dehydrogenase 1	33	0.342171	0.0108028	A0A1U7QDB4	Custom	http://www.uniprot.org/uniprot/A0A1U7QDB4	LOC101822890
C4a anaphylatoxin	33	2.74568	0.0115877	A0A1U7RGL4	Custom	http://www.uniprot.org/uniprot/A0A1U7RGL4	LOC101830930	Cell junction
fibrinogen gamma chain isoform X2	12	5.03152	0.0122371	A0A1U7QZA0	Custom	http://www.uniprot.org/uniprot/A0A1U7QZA0	Fgg	Secreted
ATP synthase subunit alpha	21	0.228254	0.0138473	F1T2M2	Custom	http://www.uniprot.org/uniprot/F1T2M2	atp5a1	Cell membrane	Produces ATP from ADP in the presence of a proton gradient across the membrane.
Hemopexin	18	5.69003	0.0143864	A0A1U7RF88	Custom	http://www.uniprot.org/uniprot/A0A1U7RF88	Hpx	Secreted	Binds heme and transports it to the liver for breakdown and iron recovery, after which the free hemopexin returns to the circulation.
kininogen-1 isoform X2	13	3.29151	0.0164941	A0A1U8BRY4	Custom	http://www.uniprot.org/uniprot/A0A1U8BRY4	Kng1	Secreted
Glutamate dehydrogenase (NAD(P)(+))	10	0.0800324	0.0173818	A0A1U7QZ08	Custom	http://www.uniprot.org/uniprot/A0A1U7QZ08	Glud1
vitronectin	4	2.63901	0.0190277	A0A1U7QY02	Custom	http://www.uniprot.org/uniprot/A0A1U7QY02	Vtn
Dihydrolipoyllysine-residue succinyltransferase component of 2-oxoglutarate dehydrogenase complex, mitochondrial	4	0.0443337	0.0225259	A0A1U7QUP4	Custom	http://www.uniprot.org/uniprot/A0A1U7QUP4	Dlst	Mitochondrion matrix
SEC14-like protein 3	20	0.22509	0.0265244	A0A3Q0CNB5	Custom	http://www.uniprot.org/uniprot/A0A3Q0CNB5	LOC106021050
alpha-actinin-4	21	0.201247	0.0315073	A0A3Q0CD83	Custom	http://www.uniprot.org/uniprot/A0A3Q0CD83	Actn4
Alpha-1-microglobulin	5	5.6946	0.0339176	A0A1U7QUT5	Custom	http://www.uniprot.org/uniprot/A0A1U7QUT5	Ambp	Secreted
lactotransferrin	26	6.71902	0.0339785	A0A3Q0CY55	Custom	http://www.uniprot.org/uniprot/A0A3Q0CY55	Ltf
L-lactate dehydrogenase	13	1.63575	0.0350071	A0A1U7Q8M1	Custom	http://www.uniprot.org/uniprot/A0A1U7Q8M1	Ldhb
ceruloplasmin	24	6.34735	0.0355736	A0A1U7R5I7	Custom	http://www.uniprot.org/uniprot/A0A1U7R5I7	Cp
Carboxylic ester hydrolase	23	0.333201	0.0370153	O35534	Custom	http://www.uniprot.org/uniprot/O35534	LOC101832386
alcohol dehydrogenase 1 isoform X2	5	0.180709	0.0384232	A0A1U8CPM3	Custom	http://www.uniprot.org/uniprot/A0A1U8CPM3	LOC101823051
inter-alpha-trypsin inhibitor heavy chain H4 isoform X4	6	8.30022	0.0391653	A0A3Q0DF98	Custom	http://www.uniprot.org/uniprot/A0A3Q0DF98	Itih4	Secreted
Xanthine dehydrogenase	9	3.11163	0.0398969	A0A1U7QV01	Custom	http://www.uniprot.org/uniprot/A0A1U7QV01	Xdh	Cytoplasm
rano class II histocompatibility antigen, A beta chain-like	3	15.351	0.0437152	A0A1U7RGM3	Custom	http://www.uniprot.org/uniprot/A0A1U7RGM3	LOC101834868	Membrane
LIM domain only protein 7 isoform X5	4	0.0583755	0.0444538	A0A3Q0CJZ8	Custom	http://www.uniprot.org/uniprot/A0A3Q0CJZ8	Lmo7
Aldose 1-epimerase	6	0.161994	0.0460618	A0A1U7QJP2	Custom	http://www.uniprot.org/uniprot/A0A1U7QJP2	Galm		Mutarotase that catalyzes the interconversion of beta-D-galactose and alpha-D-galactose during galactose metabolism.
Aspartate aminotransferase	8	0.357096	0.0488247	A0A1U7R0U8	Custom	http://www.uniprot.org/uniprot/A0A1U7R0U8	Got2
Proteasome subunit alpha type	4	0.178408	0.0495973	A0A3Q0CXQ5	Custom	http://www.uniprot.org/uniprot/A0A3Q0CXQ5	Psma7	Cytoplasm
F-actin-capping protein subunit beta	5	0.433938	0.050325	A0A3Q0D9A3	Custom	http://www.uniprot.org/uniprot/A0A3Q0D9A3	Capzb	Cytoplasm	F-actin-capping proteins bind in a Ca(2+)-independent manner to the fast growing ends of actin filaments (barbed end) thereby blocking the exchange of subunits at these ends. Unlike other capping proteins (such as gelsolin and severin), these proteins do not sever actin filaments.
3-ketoacyl-CoA thiolase, mitochondrial	6	2.96172	0.0508688	A0A1U7QZP2	Custom	http://www.uniprot.org/uniprot/A0A1U7QZP2	Acaa2
ATP synthase subunit beta	21	0.234907	0.0510098	E3WI46	Custom	http://www.uniprot.org/uniprot/E3WI46	atp5b		Mitochondrial membrane ATP synthase (F(1)F(0) ATP synthase or Complex V) produces ATP from ADP in the presence of a proton gradient across the membrane which is generated by electron transport complexes of the respiratory chain. F-type ATPases consist of two structural domains, F(1) - containing the extramembraneous catalytic core, and F(0) - containing the membrane proton channel, linked togethe…
Adenylyl cyclase-associated protein	6	736.61	0.053368	A0A1U7QR77	Custom	http://www.uniprot.org/uniprot/A0A1U7QR77	Cap1	Cell membrane	Directly regulates filament dynamics and has been implicated in a number of complex developmental and morphological processes, including mRNA localization and the establishment of cell polarity.
cysteine and glycine-rich protein 1	8	0.167923	0.0537282	A0A1U7QJB5	Custom	http://www.uniprot.org/uniprot/A0A1U7QJB5	Csrp1
Haptoglobin	17	7.84794	0.0538832	A0A1U7Q238	Custom	http://www.uniprot.org/uniprot/A0A1U7Q238	Hp		As a result of hemolysis, hemoglobin is found to accumulate in the kidney and is secreted in the urine. Haptoglobin captures, and combines with free plasma hemoglobin to allow hepatic recycling of heme iron and to prevent kidney damage. Haptoglobin also acts as an antioxidant, has antibacterial activity and plays a role in modulating many aspects of the acute phase response. Hemoglobin/haptoglobi…
selenium-binding protein 1	34	0.393669	0.0546534	A0A1U8CT86	Custom	http://www.uniprot.org/uniprot/A0A1U8CT86	LOC106023276
inhibitor of carbonic anhydrase	21	3.76999	0.0551494	A0A3Q0CTE4	Custom	http://www.uniprot.org/uniprot/A0A3Q0CTE4	LOC101828453
Calcium-activated neutral proteinase 2	13	0.354203	0.0570534	A0A3Q0D4N8	Custom	http://www.uniprot.org/uniprot/A0A3Q0D4N8	Capn2	Cell membrane
afamin	6	6.45746	0.0597411	A0A3Q0CMD9	Custom	http://www.uniprot.org/uniprot/A0A3Q0CMD9	Afm	Secreted
cytosolic non-specific dipeptidase	5	0.245974	0.0603225	A0A1U7Q662	Custom	http://www.uniprot.org/uniprot/A0A1U7Q662	Cndp2
plastin-2	11	2.01758	0.0613558	A0A1U8C1L0	Custom	http://www.uniprot.org/uniprot/A0A1U8C1L0	Lcp1
complement factor H	10	16.7785	0.0622522	A0A3Q0CVY4	Custom	http://www.uniprot.org/uniprot/A0A3Q0CVY4	Cfh
Dipeptidyl peptidase 3	5	0.33713	0.0640299	A0A1U8BTS8	Custom	http://www.uniprot.org/uniprot/A0A1U8BTS8	Dpp3
aldehyde dehydrogenase, mitochondrial	17	0.172895	0.0670542	A0A1U7QWP4	Custom	http://www.uniprot.org/uniprot/A0A1U7QWP4	Aldh2
retinoic acid-induced protein 3	6	0.358588	0.070516	A0A1U7Q8K6	Custom	http://www.uniprot.org/uniprot/A0A1U7Q8K6	Gprc5a	Cell membrane
plectin isoform X25	59	0.392964	0.0714131	A0A3Q0CEN2	Custom	http://www.uniprot.org/uniprot/A0A3Q0CEN2	LOC101836251	Cytoplasm
filamin-A	44	0.142466	0.0714391	A0A1U8CZP3	Custom	http://www.uniprot.org/uniprot/A0A1U8CZP3	Flna
complement factor I	6	4.91339	0.0721736	A0A1U8CF62	Custom	http://www.uniprot.org/uniprot/A0A1U8CF62	Cfi
filamin-A	46	0.209549	0.0724324	A0A1U7R5X7	Custom	http://www.uniprot.org/uniprot/A0A1U7R5X7	LOC101842052
C3/C5 convertase	18	4.20427	0.0725804	A0A1U7RGK9	Custom	http://www.uniprot.org/uniprot/A0A1U7RGK9	Cfb	Secreted
polymeric immunoglobulin receptor isoform X2	5	0.153894	0.0726417	A0A3Q0D5Q8	Custom	http://www.uniprot.org/uniprot/A0A3Q0D5Q8	Pigr
Gc-globulin	24	2.46938	0.0745273	A0A1U8BMS0	Custom	http://www.uniprot.org/uniprot/A0A1U8BMS0	Gc	Secreted	Involved in vitamin D transport and storage, scavenging of extracellular G-actin, enhancement of the chemotactic activity of C5 alpha for neutrophils in inflammation and macrophage activation.
60S ribosomal protein L13	3	0.10414	0.0762111	A0A1U8C662	Custom	http://www.uniprot.org/uniprot/A0A1U8C662	Rpl13
Heat shock 70 kDa protein 4	6	0.103822	0.0793001	A0A3Q0CGE1	Custom	http://www.uniprot.org/uniprot/A0A3Q0CGE1	Hspa4	Cytoplasm
40S ribosomal protein S3	7	0.323846	0.0800232	A0A1U7Q9Q4	Custom	http://www.uniprot.org/uniprot/A0A1U7Q9Q4	Rps3	Cytoplasm
A-kinase anchor protein 5	6	2.73161	0.0811932	A0A1U8C5D0	Custom	http://www.uniprot.org/uniprot/A0A1U8C5D0	Akap5	Membrane
Clusterin	3	114.644	0.0830923	A0A1U8C2W4	Custom	http://www.uniprot.org/uniprot/A0A1U8C2W4	Clu	Cytoplasm	Functions as extracellular chaperone that prevents aggregation of non native proteins. Prevents stress-induced aggregation of blood plasma proteins.
MARCKS-related protein	2	1.46036	0.0855611	A0A1U7QRT5	Custom	http://www.uniprot.org/uniprot/A0A1U7QRT5	Marcksl1
clathrin coat assembly protein AP180 isoform X9	2	322.276	0.0867819	A0A1U8C7I8	Custom	http://www.uniprot.org/uniprot/A0A1U8C7I8	Snap91	Membrane
Transgelin	5	2.12634	0.088017	A0A1U8BXX5	Custom	http://www.uniprot.org/uniprot/A0A1U8BXX5	Tagln
lamin-B1	9	0.146205	0.0909661	A0A1U7QJV3	Custom	http://www.uniprot.org/uniprot/A0A1U7QJV3	Lmnb1
ATP-citrate synthase	2	68.7874	0.0921497	A0A1U7RHI7	Custom	http://www.uniprot.org/uniprot/A0A1U7RHI7	Acly		Catalyzes the cleavage of citrate into oxaloacetate and acetyl-CoA, the latter serving as common substrate for de novo cholesterol and fatty acid synthesis.
nestin	10	0.206944	0.093803	A0A1U8CKE4	Custom	http://www.uniprot.org/uniprot/A0A1U8CKE4	Nes
Fibrinogen beta chain	14	3.64463	0.0941839	A0A1U7QCL5	Custom	http://www.uniprot.org/uniprot/A0A1U7QCL5	Fgb	Secreted
Calcium-activated neutral proteinase small subunit	2	74.7412	0.0949571	A0A1U7QYM4	Custom	http://www.uniprot.org/uniprot/A0A1U7QYM4	Capns1	Cell membrane	Regulatory subunit of the calcium-regulated non-lysosomal thiol-protease which catalyzes limited proteolysis of substrates involved in cytoskeletal remodeling and signal transduction.
histidine-rich glycoprotein	3	62.8862	0.0972218	A0A1U7QP95	Custom	http://www.uniprot.org/uniprot/A0A1U7QP95	Hrg
alpha-1B-glycoprotein	10	189.588	0.0976007	A0A1U8C678	Custom	http://www.uniprot.org/uniprot/A0A1U8C678	A1bg
40S ribosomal protein SA	3	0.40662	0.0977175	A0A1U7QWC5	Custom	http://www.uniprot.org/uniprot/A0A1U7QWC5	Rpsa	Cell membrane	Required for the assembly and/or stability of the 40S ribosomal subunit. Required for the processing of the 20S rRNA-precursor to mature 18S rRNA in a late step of the maturation of 40S ribosomal subunits. Also functions as a cell surface receptor for laminin. Plays a role in cell adhesion to the basement membrane and in the consequent activation of signaling transduction pathways. May play a rol…
Phosphoglycerate kinase	10	0.4825	0.0986454	A0A3Q0CJ34	Custom	http://www.uniprot.org/uniprot/A0A3Q0CJ34	LOC110340293
Decorin	2	42.8506	0.102817	A0A1U8BM80	Custom	http://www.uniprot.org/uniprot/A0A1U8BM80	Dcn	Secreted	May affect the rate of fibrils formation.
Long-chain specific acyl-CoA dehydrogenase, mitochondrial	6	9.30024	0.103331	A0A1U7QEH5	Custom	http://www.uniprot.org/uniprot/A0A1U7QEH5	Acadl	Mitochondrion matrix
fetuin-B	13	3.19541	0.103633	A0A1U7QP51	Custom	http://www.uniprot.org/uniprot/A0A1U7QP51	Fetub	Secreted
uncharacterized protein LOC106021997	2	0.016513	0.104166	A0A1U8CAI9	Custom	http://www.uniprot.org/uniprot/A0A1U8CAI9	LOC106021997
caldesmon	2	0.0317186	0.109326	A0A3Q0D9S4	Custom	http://www.uniprot.org/uniprot/A0A3Q0D9S4	Cald1
Glutathione transferase	4	46.7125	0.110397	A0A1U7R5S8	Custom	http://www.uniprot.org/uniprot/A0A1U7R5S8	LOC101822730	Cytoplasm
Glucose-6-phosphate isomerase	15	0.486265	0.112678	A0A1U7QYI9	Custom	http://www.uniprot.org/uniprot/A0A1U7QYI9	Gpi
Coronin	9	4.26293	0.118748	A0A1U8BRU3	Custom	http://www.uniprot.org/uniprot/A0A1U8BRU3	Coro1a	Cytoplasm
Prolyl endopeptidase	3	0.0308007	0.119466	A0A3Q0CQK6	Custom	http://www.uniprot.org/uniprot/A0A3Q0CQK6	Prep
Galectin	3	55.6785	0.119878	A0A1U7R1X7	Custom	http://www.uniprot.org/uniprot/A0A1U7R1X7	Lgals3	Cytoplasm
ankyrin-1 isoform X18	6	0.0327514	0.120966	A0A3Q0CEC9	Custom	http://www.uniprot.org/uniprot/A0A3Q0CEC9	Ank1	Cytoplasm
fatty acid-binding protein, epidermal isoform X1	8	0.372518	0.122745	A0A1U7QG37	Custom	http://www.uniprot.org/uniprot/A0A1U7QG37	Fabp5
immunoglobulin lambda-1 light chain-like isoform X7	3	28.1645	0.122891	A0A3Q0D3R0	Custom	http://www.uniprot.org/uniprot/A0A3Q0D3R0	LOC101841371
Ferritin	3	43.4934	0.12369	A0A1U7QB70	Custom	http://www.uniprot.org/uniprot/A0A1U7QB70	Fth1		Stores iron in a soluble, non-toxic, readily available form. Important for iron homeostasis. Iron is taken up in the ferrous form and deposited as ferric hydroxides after oxidation.
15S Mg(2+)-ATPase p97 subunit	20	0.426079	0.124736	A0A1U7QTL0	Custom	http://www.uniprot.org/uniprot/A0A1U7QTL0	Vcp	Cytoplasm
peroxiredoxin-1	4	2.91203	0.126649	A0A3Q0CTG2	Custom	http://www.uniprot.org/uniprot/A0A3Q0CTG2	Prdx1	Cytoplasm	Thiol-specific peroxidase that catalyzes the reduction of hydrogen peroxide and organic hydroperoxides to water and alcohols, respectively.
Actin-depolymerizing factor	23	0.555049	0.126736	A0A1U7R919	Custom	http://www.uniprot.org/uniprot/A0A1U7R919	Gsn
Fibronectin	5	24.7818	0.128108	A0A1U7QEG0	Custom	http://www.uniprot.org/uniprot/A0A1U7QEG0	Fn1
myristoylated alanine-rich C-kinase substrate	7	0.777674	0.12817	A0A3Q0CVN6	Custom	http://www.uniprot.org/uniprot/A0A3Q0CVN6	Marcks
spectrin alpha chain, non-erythrocytic 1 isoform X1	66	0.158368	0.129222	A0A1U8CY20	Custom	http://www.uniprot.org/uniprot/A0A1U8CY20	Sptan1	Cytoplasm
cytochrome b-c1 complex subunit 1, mitochondrial	3	17.6089	0.132633	A0A1U7QJ36	Custom	http://www.uniprot.org/uniprot/A0A1U7QJ36	LOC101825065
14-3-3 protein zeta/delta	19	0.60143	0.133752	A0A3Q0CUU3	Custom	http://www.uniprot.org/uniprot/A0A3Q0CUU3	Ywhaz	Cytoplasm
Dihydropyrimidinase-related protein 2	23	0.502542	0.136404	A0A1U7QME0	Custom	http://www.uniprot.org/uniprot/A0A1U7QME0	Dpysl2
polymerase I and transcript release factor	9	0.333617	0.136664	A0A1U7QP67	Custom	http://www.uniprot.org/uniprot/A0A1U7QP67	Cavin1	Membrane
beta-actin-like protein 2 isoform X2	2	22.0676	0.139767	A0A1U7Q7Z6	Custom	http://www.uniprot.org/uniprot/A0A1U7Q7Z6	Actbl2
Ribonuclease inhibitor	7	0.161036	0.141084	A0A1U8C3T2	Custom	http://www.uniprot.org/uniprot/A0A1U8C3T2	Rnh1	Cytoplasm
Major vault protein	24	0.274463	0.141398	A0A1U7Q577	Custom	http://www.uniprot.org/uniprot/A0A1U7Q577	Mvp	Cytoplasm
Proteasome subunit alpha type	1	11.8609	0.141611	A0A3Q0CV02	Custom	http://www.uniprot.org/uniprot/A0A3Q0CV02	Psma3	Cytoplasm
Alpha-1,4 glucan phosphorylase	4	0.0642466	0.144523	A0A1U7QHV5	Custom	http://www.uniprot.org/uniprot/A0A1U7QHV5	Pygb		Phosphorylase is an important allosteric enzyme in carbohydrate metabolism. Enzymes from different sources differ in their regulatory mechanisms and in their natural substrates. However, all known phosphorylases share catalytic and structural properties.
xaa-Pro dipeptidase	2	0.481262	0.145293	A0A1U7QVI0	Custom	http://www.uniprot.org/uniprot/A0A1U7QVI0	Pepd
EH domain-containing protein 2	10	0.516198	0.146004	A0A1U7RDJ6	Custom	http://www.uniprot.org/uniprot/A0A1U7RDJ6	Ehd2	Cell membrane
C3-beta-c	84	2.28825	0.146291	A0A3Q0D994	Custom	http://www.uniprot.org/uniprot/A0A3Q0D994	C3	Secreted	Acts as a chemoattractant for neutrophils in chronic inflammation.
Sulfurtransferase	3	0.0824694	0.146576	A0A3Q0CF03	Custom	http://www.uniprot.org/uniprot/A0A3Q0CF03	Tst
Maillard deglycase	3	0.00788698	0.147622	A0A1U8C7F2	Custom	http://www.uniprot.org/uniprot/A0A1U8C7F2	Park7	Cell membrane
pregnancy zone protein-like	80	2.16284	0.148571	A0A1U8CUG0	Custom	http://www.uniprot.org/uniprot/A0A1U8CUG0	LOC101844701	Secreted
endoplasmic reticulum metallopeptidase 1	2	0.0993093	0.148729	A0A3Q0CLI1	Custom	http://www.uniprot.org/uniprot/A0A3Q0CLI1	Ermp1
inter-alpha-trypsin inhibitor heavy chain H3 precursor	5	10.5023	0.150078	A0A1U7Q227	Custom	http://www.uniprot.org/uniprot/A0A1U7Q227	Itih3	Secreted
Glutathione reductase	4	0.343586	0.150111	A0A3Q0CJH2	Custom	http://www.uniprot.org/uniprot/A0A3Q0CJH2	Gsr	Cytoplasm	Maintains high levels of reduced glutathione in the cytosol.
lymphocyte-specific protein 1 isoform X2	3	9.29719	0.150728	A0A1U7Q2X0	Custom	http://www.uniprot.org/uniprot/A0A1U7Q2X0	Lsp1
protein S100-A9	5	15.5239	0.150855	A0A1U7QW31	Custom	http://www.uniprot.org/uniprot/A0A1U7QW31	LOC101830989
cytochrome P450 4B1	2	0.101328	0.151265	A0A1U7QSJ9	Custom	http://www.uniprot.org/uniprot/A0A1U7QSJ9	LOC101822933
Perilipin	2	11.0059	0.151422	A0A1U8CNA8	Custom	http://www.uniprot.org/uniprot/A0A1U8CNA8	Plin3
Decorin (Fragment)	2	11.4186	0.151479	B6V7E0	Custom	http://www.uniprot.org/uniprot/B6V7E0		Secreted	May affect the rate of fibrils formation.
ubiquitin-conjugating enzyme E2 N	3	11.8617	0.15202	A0A1U7QI67	Custom	http://www.uniprot.org/uniprot/A0A1U7QI67	Ube2n
protein CDV3 homolog isoform X4	3	1.43193	0.152178	A0A1U8C4B2	Custom	http://www.uniprot.org/uniprot/A0A1U8C4B2	Cdv3
Dimethylargininase	3	0.527307	0.153184	A0A1U7R660	Custom	http://www.uniprot.org/uniprot/A0A1U7R660	Ddah2
Nucleolin	6	10.505	0.15456	A0A3Q0DAC7	Custom	http://www.uniprot.org/uniprot/A0A3Q0DAC7	Ncl	Cytoplasm
Cadherin-5	3	0.286711	0.155225	A0A1U7QTB8	Custom	http://www.uniprot.org/uniprot/A0A1U7QTB8	Cdh5	Cell junction	Cadherins are calcium-dependent cell adhesion proteins.
polyubiquitin-B	3	8.91063	0.155916	A0A1U8BTM1	Custom	http://www.uniprot.org/uniprot/A0A1U8BTM1	Ubb
T1-TrpRS	5	9.29531	0.155933	A0A1U7Q957	Custom	http://www.uniprot.org/uniprot/A0A1U7Q957	Wars
ras-related protein Rab-5B	2	0.51029	0.156442	A0A1U7QS77	Custom	http://www.uniprot.org/uniprot/A0A1U7QS77	Rab5b
60S acidic ribosomal protein P0	3	6.93951	0.159153	A0A3Q0D509	Custom	http://www.uniprot.org/uniprot/A0A3Q0D509	Rplp0		Ribosomal protein P0 is the functional equivalent of E.coli protein L10.
synaptic vesicle membrane protein VAT-1 homolog	6	7.29974	0.159611	A0A3Q0CPW9	Custom	http://www.uniprot.org/uniprot/A0A3Q0CPW9	Vat1
ras-related protein Rab-10	2	6.93236	0.159865	A0A1U7R1L4	Custom	http://www.uniprot.org/uniprot/A0A1U7R1L4	Rab10
Adenine phosphoribosyltransferase	5	6.65031	0.16032	A0A3Q0CVK0	Custom	http://www.uniprot.org/uniprot/A0A3Q0CVK0	Aprt	Cytoplasm	Catalyzes a salvage reaction resulting in the formation of AMP, that is energically less costly than de novo synthesis.
CD59 glycoprotein	2	0.171143	0.160416	A0A1U7Q318	Custom	http://www.uniprot.org/uniprot/A0A1U7Q318	Cd59
flavin reductase (NADPH)	7	2.98199	0.160886	A0A1U7RG83	Custom	http://www.uniprot.org/uniprot/A0A1U7RG83	Blvrb
nuclear mitotic apparatus protein 1 isoform X2	2	0.178072	0.162538	A0A1U8C7K7	Custom	http://www.uniprot.org/uniprot/A0A1U8C7K7	Numa1
Glutathione transferase	1	5.99542	0.162706	A0A3Q0CU39	Custom	http://www.uniprot.org/uniprot/A0A3Q0CU39	LOC101841073
spectrin alpha chain, non-erythrocytic 1 isoform X5	15	0.248698	0.164417	A0A1U8CL70	Custom	http://www.uniprot.org/uniprot/A0A1U8CL70	Sptan1	Cytoplasm
actin-related protein 2/3 complex subunit 4	2	0.162254	0.164713	A0A3Q0CJ20	Custom	http://www.uniprot.org/uniprot/A0A3Q0CJ20	Arpc4	Cell projection
40S ribosomal protein S19	3	2.53583	0.165152	A0A1U8CSH8	Custom	http://www.uniprot.org/uniprot/A0A1U8CSH8	Rps19
Ubiquitin-activating enzyme E1	11	2.27165	0.165656	A0A1U8CLZ3	Custom	http://www.uniprot.org/uniprot/A0A1U8CLZ3	Uba1
serine protease inhibitor A3N-like isoform X2	4	5.73555	0.165834	A0A3Q0CMB2	Custom	http://www.uniprot.org/uniprot/A0A3Q0CMB2	LOC101835835
Annexin	8	0.612794	0.165988	A0A1U8BR52	Custom	http://www.uniprot.org/uniprot/A0A1U8BR52	Anxa5		This protein is an anticoagulant protein that acts as an indirect inhibitor of the thromboplastin-specific complex, which is involved in the blood coagulation cascade.
Annexin	6	0.490219	0.166663	A0A1U8CJF3	Custom	http://www.uniprot.org/uniprot/A0A1U8CJF3	Anxa7
hemoglobin subunit beta	20	0.517521	0.166961	A0A3Q0CX13	Custom	http://www.uniprot.org/uniprot/A0A3Q0CX13	LOC101833678
epidermal growth factor receptor substrate 15-like 1	3	0.302817	0.168225	A0A1U8CSM3	Custom	http://www.uniprot.org/uniprot/A0A1U8CSM3	Eps15l1
plasma kallikrein isoform X2	5	8.01017	0.168605	A0A3Q0CLL1	Custom	http://www.uniprot.org/uniprot/A0A3Q0CLL1	Klkb1
laminin subunit beta-1	6	0.211064	0.17072	A0A1U7QZD4	Custom	http://www.uniprot.org/uniprot/A0A1U7QZD4	Lamb1	Membrane
ras-like GTP-binding protein O-RHO	2	5.21343	0.172077	A0A3Q0CJU6	Custom	http://www.uniprot.org/uniprot/A0A3Q0CJU6	LOC110340059
182 kDa tankyrase-1-binding protein	4	0.180723	0.172786	A0A1U7QFR6	Custom	http://www.uniprot.org/uniprot/A0A1U7QFR6	Tnks1bp1
15 kDa phosphoprotein enriched in astrocytes	2	4.14742	0.175015	A0A1U7R032	Custom	http://www.uniprot.org/uniprot/A0A1U7R032	Pea15	Cytoplasm
band 4.1-like protein 2 isoform X13	2	5.90812	0.176773	A0A3Q0CGQ5	Custom	http://www.uniprot.org/uniprot/A0A3Q0CGQ5	Epb41l2
cingulin	5	0.251694	0.177031	A0A1U8D196	Custom	http://www.uniprot.org/uniprot/A0A1U8D196	Cgn
Tetraspanin	2	0.247869	0.178884	A0A1U7QE11	Custom	http://www.uniprot.org/uniprot/A0A1U7QE11	Cd81	Membrane
Pyruvate kinase	24	0.439048	0.180216	A0A3Q0CPN1	Custom	http://www.uniprot.org/uniprot/A0A3Q0CPN1	Pkm
60S ribosomal protein L30	2	0.255989	0.180491	A0A1U7QTG4	Custom	http://www.uniprot.org/uniprot/A0A1U7QTG4	Rpl30
4-trimethylaminobutyraldehyde dehydrogenase	1	0.556676	0.180555	A0A1U7QD86	Custom	http://www.uniprot.org/uniprot/A0A1U7QD86	Aldh9a1
Malate dehydrogenase (Fragment)	9	0.552924	0.181527	Q0QF41	Custom	http://www.uniprot.org/uniprot/Q0QF41	MDH2
Peptidyl-prolyl cis-trans isomerase (Fragment)	1	0	0.183504	Q9ERB9	Custom	http://www.uniprot.org/uniprot/Q9ERB9			PPIases accelerate the folding of proteins. It catalyzes the cis-trans isomerization of proline imidic peptide bonds in oligopeptides.
tropomyosin alpha-1 chain isoform X13	1	0	0.183505	A0A1U7QVG3	Custom	http://www.uniprot.org/uniprot/A0A1U7QVG3	Tpm1	Cytoplasm
early endosome antigen 1	4	#DIV/0!	0.183515	A0A1U8BJP0	Custom	http://www.uniprot.org/uniprot/A0A1U8BJP0	Eea1
collagen alpha-1(XII) chain isoform X2	1	0	0.183527	A0A3Q0CR74	Custom	http://www.uniprot.org/uniprot/A0A3Q0CR74	Col12a1
Mitochondrial brown fat uncoupling protein 1	5	#DIV/0!	0.183528	A0A1U7Q207	Custom	http://www.uniprot.org/uniprot/A0A1U7Q207	Ucp1	Membrane	Mitochondrial protein responsible for thermogenic respiration, a specialized capacity of brown adipose tissue and beige fat that participates in non-shivering adaptive thermogenesis to temperature and diet variations and more generally to the regulation of energy balance. Functions as a long-chain fatty acid/LCFA and proton symporter, simultaneously transporting one LCFA and one proton through th…
immunoglobulin lambda-1 light chain-like isoform X2	4	#DIV/0!	0.183544	A0A3Q0D1Q4	Custom	http://www.uniprot.org/uniprot/A0A3Q0D1Q4	LOC101839749
thioredoxin domain-containing protein 11 isoform X3	1	0	0.183549	A0A3Q0DE07	Custom	http://www.uniprot.org/uniprot/A0A3Q0DE07	Txndc11
kinectin	2	#DIV/0!	0.183563	A0A3Q0CE39	Custom	http://www.uniprot.org/uniprot/A0A3Q0CE39	Ktn1
2,4-dienoyl-CoA reductase, mitochondrial	5	#DIV/0!	0.183564	A0A1U7QG86	Custom	http://www.uniprot.org/uniprot/A0A1U7QG86	Decr1
C4b-binding protein alpha chain	5	#DIV/0!	0.183596	A0A1U7QVF6	Custom	http://www.uniprot.org/uniprot/A0A1U7QVF6	C4bpa
ATP-binding cassette sub-family A member 8-A-like	1	0	0.183612	A0A1U8BZR7	Custom	http://www.uniprot.org/uniprot/A0A1U8BZR7	LOC101829788	Membrane
Phosphoenolpyruvate carboxykinase (GTP)	2	#DIV/0!	0.183616	A0A1U8D2Y6	Custom	http://www.uniprot.org/uniprot/A0A1U8D2Y6	LOC106023045
choline transporter-like protein 2	1	0	0.183629	A0A3Q0CZW3	Custom	http://www.uniprot.org/uniprot/A0A3Q0CZW3	Slc44a2	Membrane
host cell factor 1 isoform X3	2	#DIV/0!	0.183654	A0A1U8CP58	Custom	http://www.uniprot.org/uniprot/A0A1U8CP58	Hcfc1	Nucleus
Angiotensin-converting enzyme	5	0	0.183697	A0A3Q0CPK0	Custom	http://www.uniprot.org/uniprot/A0A3Q0CPK0	LOC101824864
Succinate--CoA ligase [ADP/GDP-forming] subunit alpha, mitochondrial	2	#DIV/0!	0.183722	A0A1U7R2T6	Custom	http://www.uniprot.org/uniprot/A0A1U7R2T6	Suclg1	Mitochondrion	Succinyl-CoA synthetase functions in the citric acid cycle (TCA), coupling the hydrolysis of succinyl-CoA to the synthesis of either ATP or GTP and thus represents the only step of substrate-level phosphorylation in the TCA. The alpha subunit of the enzyme binds the substrates coenzyme A and phosphate, while succinate binding and specificity for either ATP or GTP is provided by different beta sub…
GrpE protein homolog	2	#DIV/0!	0.183725	A0A3Q0CSR0	Custom	http://www.uniprot.org/uniprot/A0A3Q0CSR0	Afap1l1	Cell projection	Essential component of the PAM complex, a complex required for the translocation of transit peptide-containing proteins from the inner membrane into the mitochondrial matrix in an ATP-dependent manner.
CCT-theta	1	#DIV/0!	0.18373	A0A1U7QVF4	Custom	http://www.uniprot.org/uniprot/A0A1U7QVF4	Cct8	Cytoplasm
keratin, type I cytoskeletal 17	2	#DIV/0!	0.18378	A0A1U7RHH7	Custom	http://www.uniprot.org/uniprot/A0A1U7RHH7	Krt17
retinal dehydrogenase 1-like	2	#DIV/0!	0.183793	A0A1U8D1N8	Custom	http://www.uniprot.org/uniprot/A0A1U8D1N8	LOC106022731
spectrin beta chain, non-erythrocytic 5	1	#DIV/0!	0.183916	A0A3Q0DB44	Custom	http://www.uniprot.org/uniprot/A0A3Q0DB44	Sptbn5
Pyruvate dehydrogenase E1 component subunit beta	2	#DIV/0!	0.183956	A0A1U7R1A6	Custom	http://www.uniprot.org/uniprot/A0A1U7R1A6	Pdhb		The pyruvate dehydrogenase complex catalyzes the overall conversion of pyruvate to acetyl-CoA and CO(2), and thereby links the glycolytic pathway to the tricarboxylic cycle.
Mitsugumin-53	1	#DIV/0!	0.183975	A0A1U7QBW8	Custom	http://www.uniprot.org/uniprot/A0A1U7QBW8	Trim72	Cell membrane
Glutathione S-transferase	3	#DIV/0!	0.183992	A0A1U7Q2C9	Custom	http://www.uniprot.org/uniprot/A0A1U7Q2C9	LOC101829268	Cytoplasm
collagen alpha-1(V) chain isoform X5	2	#DIV/0!	0.18402	A0A1U8CL81	Custom	http://www.uniprot.org/uniprot/A0A1U8CL81	Col5a1
Microtubule-associated protein	3	0	0.184073	K9RY96	Custom	http://www.uniprot.org/uniprot/K9RY96	Mapt	Cell projection
testis-expressed protein 44	2	#DIV/0!	0.184074	A0A1U8CDS7	Custom	http://www.uniprot.org/uniprot/A0A1U8CDS7	Tex44
Ribosomal protein L18 (Fragment)	3	0	0.184176	Q0QEW7	Custom	http://www.uniprot.org/uniprot/Q0QEW7	RPL18	Endoplasmic reticulum	Component of the large ribosomal subunit.
tubulin alpha chain	4	0.457694	0.184218	A0A3Q0CHD5	Custom	http://www.uniprot.org/uniprot/A0A3Q0CHD5	LOC110339886
cilia- and flagella-associated protein 53	1	#DIV/0!	0.184271	A0A3Q0D103	Custom	http://www.uniprot.org/uniprot/A0A3Q0D103	Cfap53
Carboxypeptidase Q	2	#DIV/0!	0.184358	A0A1U8BU47	Custom	http://www.uniprot.org/uniprot/A0A1U8BU47	Cpq	Endoplasmic reticulum
aldo-keto reductase family 1 member C13-like	2	#DIV/0!	0.184393	A0A1U8BS70	Custom	http://www.uniprot.org/uniprot/A0A1U8BS70	LOC101838853
rho GDP-dissociation inhibitor 2	2	#DIV/0!	0.184408	A0A1U8BXQ8	Custom	http://www.uniprot.org/uniprot/A0A1U8BXQ8	Arhgdib
acetyl-CoA acetyltransferase, mitochondrial	3	0	0.184552	A0A1U7QN51	Custom	http://www.uniprot.org/uniprot/A0A1U7QN51	Acat1
Nucleoside-diphosphate kinase	2	#DIV/0!	0.184633	A0A1U8D491	Custom	http://www.uniprot.org/uniprot/A0A1U8D491	LOC101832519
Histone H2A	1	#DIV/0!	0.184643	A0A3Q0CEZ1	Custom	http://www.uniprot.org/uniprot/A0A3Q0CEZ1	LOC101840156	Chromosome
capZ-interacting protein isoform X2	1	#DIV/0!	0.184819	A0A1U8BR78	Custom	http://www.uniprot.org/uniprot/A0A1U8BR78	Rcsd1
Fibrinogen A-alpha-chain (Fragment)	4	#DIV/0!	0.185004	Q08283	Custom	http://www.uniprot.org/uniprot/Q08283
3-hydroxyacyl-CoA dehydrogenase type-2	2	#DIV/0!	0.185064	A0A1U7RF68	Custom	http://www.uniprot.org/uniprot/A0A1U7RF68	Hsd17b10
keratin, type II cytoskeletal 8	6	0.32335	0.185101	A0A1U7QH04	Custom	http://www.uniprot.org/uniprot/A0A1U7QH04	Krt8
NAD(+) hydrolase SARM1	2	#DIV/0!	0.18523	A0A1U7R0M8	Custom	http://www.uniprot.org/uniprot/A0A1U7R0M8	Sarm1	Cell projection
peptidyl-prolyl cis-trans isomerase A	2	#DIV/0!	0.185315	A0A1U7RE28	Custom	http://www.uniprot.org/uniprot/A0A1U7RE28	Ppia
filamin-A-interacting protein 1 isoform X3	1	#DIV/0!	0.185707	A0A3Q0CWD9	Custom	http://www.uniprot.org/uniprot/A0A3Q0CWD9	Filip1
integrin alpha-1	3	4.1546	0.185734	A0A3Q0D7A4	Custom	http://www.uniprot.org/uniprot/A0A3Q0D7A4	Itga1	Membrane
splicing factor 3B subunit 3	5	0	0.185871	A0A3Q0CWJ5	Custom	http://www.uniprot.org/uniprot/A0A3Q0CWJ5	Sf3b3
fermitin family homolog 2 isoform X4	2	0	0.186023	A0A1U8CM55	Custom	http://www.uniprot.org/uniprot/A0A1U8CM55	Fermt2
3-hydroxy-3-methylglutaryl coenzyme A synthase	2	#DIV/0!	0.186406	A0A1U7QR10	Custom	http://www.uniprot.org/uniprot/A0A1U7QR10	Hmgcs2		This enzyme condenses acetyl-CoA with acetoacetyl-CoA to form HMG-CoA, which is the substrate for HMG-CoA reductase.
Phosphoglycerate mutase	2	2.71055	0.187035	A0A1U7QZF0	Custom	http://www.uniprot.org/uniprot/A0A1U7QZF0	Bpgm
nuclease-sensitive element-binding protein 1	2	#DIV/0!	0.188351	A0A3Q0D8X0	Custom	http://www.uniprot.org/uniprot/A0A3Q0D8X0	Ybx1
CD177 antigen	2	#DIV/0!	0.188998	A0A3Q0CFI0	Custom	http://www.uniprot.org/uniprot/A0A3Q0CFI0	LOC101826588
Serine/threonine-protein phosphatase	1	#DIV/0!	0.18928	A0A1U8CS42	Custom	http://www.uniprot.org/uniprot/A0A1U8CS42	Ppp3cb
plasma protease C1 inhibitor	6	#DIV/0!	0.18969	A0A1U8CDV4	Custom	http://www.uniprot.org/uniprot/A0A1U8CDV4	Serping1
Tubulin polymerization-promoting protein family member 3	3	#DIV/0!	0.190026	A0A1U7QZG6	Custom	http://www.uniprot.org/uniprot/A0A1U7QZG6	Tppp3	Cytoplasm
band 4.1-like protein 2 isoform X17	2	2.43068	0.190801	A0A3Q0CGR1	Custom	http://www.uniprot.org/uniprot/A0A3Q0CGR1	Epb41l2
far upstream element-binding protein 1 isoform X10	3	3.26402	0.191355	A0A1U7R8X3	Custom	http://www.uniprot.org/uniprot/A0A1U7R8X3	Fubp1	Nucleus
hepatocyte growth factor activator	2	#DIV/0!	0.192117	A0A1U8BWG5	Custom	http://www.uniprot.org/uniprot/A0A1U8BWG5	Hgfac
Deoxynucleoside triphosphate triphosphohydrolase SAMHD1	2	#DIV/0!	0.192687	A0A3Q0DET6	Custom	http://www.uniprot.org/uniprot/A0A3Q0DET6	Samhd1	Chromosome
2-phospho-D-glycerate hydro-lyase	19	0.632783	0.193084	A0A3Q0D5K3	Custom	http://www.uniprot.org/uniprot/A0A3Q0D5K3	Eno1
zyxin isoform X2	7	0.329586	0.193113	A0A1U8CR39	Custom	http://www.uniprot.org/uniprot/A0A1U8CR39	Zyx
calcyphosin	2	2.2923	0.195375	A0A1U8CC09	Custom	http://www.uniprot.org/uniprot/A0A1U8CC09	Caps
Phosphoacetylglucosamine mutase	2	0.659154	0.195599	A0A1U7QSE1	Custom	http://www.uniprot.org/uniprot/A0A1U7QSE1	Pgm3		Catalyzes the conversion of GlcNAc-6-P into GlcNAc-1-P during the synthesis of uridine diphosphate/UDP-GlcNAc, a sugar nucleotide critical to multiple glycosylation pathways including protein N- and O-glycosylation.
importin subunit beta-1	1	2.1523	0.196232	A0A1U7QKP8	Custom	http://www.uniprot.org/uniprot/A0A1U7QKP8	Kpnb1	Cytoplasm
Fibulin-1	2	2.30669	0.196555	A0A3Q0CF74	Custom	http://www.uniprot.org/uniprot/A0A3Q0CF74	Fbln1	Secreted	Incorporated into fibronectin-containing matrix fibers. May play a role in cell adhesion and migration along protein fibers within the extracellular matrix (ECM). Could be important for certain developmental processes and contribute to the supramolecular organization of ECM architecture, in particular to those of basement membranes.
Ubiquitin carboxyl-terminal hydrolase	1	2.28877	0.196829	A0A1U7Q3L0	Custom	http://www.uniprot.org/uniprot/A0A1U7Q3L0	Usp5		Deubiquitinating enzyme that removes conjugated ubiquitin from specific proteins to regulate different cellular processes.
integrin alpha-M isoform X3	2	3.58585	0.1977	A0A3Q0CU57	Custom	http://www.uniprot.org/uniprot/A0A3Q0CU57	Itgam	Membrane
Band 4.1	2	2.05475	0.197799	A0A3Q0D567	Custom	http://www.uniprot.org/uniprot/A0A3Q0D567	Epb41	Cytoplasm
apolipoprotein A-I precursor	13	5.30327	0.198078	A0A1U7Q2B6	Custom	http://www.uniprot.org/uniprot/A0A1U7Q2B6	Apoa1	Secreted
ATP synthase F1 subunit delta	2	2.10854	0.198489	A0A1U7RAZ0	Custom	http://www.uniprot.org/uniprot/A0A1U7RAZ0	Atp5d	Mitochondrion inner membrane
ras-related protein Rab-11B	3	1.83701	0.199308	A0A1U7QLB5	Custom	http://www.uniprot.org/uniprot/A0A1U7QLB5	Rab11b
EF-hand domain-containing protein D2 isoform X1	2	#DIV/0!	0.200216	A0A1U7QXE7	Custom	http://www.uniprot.org/uniprot/A0A1U7QXE7	Efhd2
Annexin	9	0.650997	0.200932	A0A1U8C197	Custom	http://www.uniprot.org/uniprot/A0A1U8C197	Anxa4
26S proteasome non-ATPase regulatory subunit 2	4	1.85264	0.201081	A0A3Q0CT51	Custom	http://www.uniprot.org/uniprot/A0A3Q0CT51	Psmd2		Binds to the intracellular domain of tumor necrosis factor type 1 receptor. The binding domain of TRAP1 and TRAP2 resides outside the death domain of TNFR1.
Eukaryotic translation initiation factor 3 subunit I	2	1.8897	0.203601	A0A1U8C7Z7	Custom	http://www.uniprot.org/uniprot/A0A1U8C7Z7	Eif3i	Cytoplasm	Component of the eukaryotic translation initiation factor 3 (eIF-3) complex, which is required for several steps in the initiation of protein synthesis. The eIF-3 complex associates with the 40S ribosome and facilitates the recruitment of eIF-1, eIF-1A, eIF-2:GTP:methionyl-tRNAi and eIF-5 to form the 43S pre-initiation complex (43S PIC). The eIF-3 complex stimulates mRNA recruitment to the 43S PI…
delta(3,5)-Delta(2,4)-dienoyl-CoA isomerase, mitochondrial	4	2.57516	0.204306	A0A1U7RD51	Custom	http://www.uniprot.org/uniprot/A0A1U7RD51	Ech1
succinate-semialdehyde dehydrogenase, mitochondrial	3	0.275269	0.204724	A0A3Q0CJ85	Custom	http://www.uniprot.org/uniprot/A0A3Q0CJ85	Aldh5a1
receptor of activated protein C kinase 1	5	1.65535	0.204803	A0A1U7QGY2	Custom	http://www.uniprot.org/uniprot/A0A1U7QGY2	Rack1
Ribose-phosphate diphosphokinase	1	1.7488	0.206985	A0A1U7QDE2	Custom	http://www.uniprot.org/uniprot/A0A1U7QDE2	Prps1		Catalyzes the synthesis of phosphoribosylpyrophosphate (PRPP) that is essential for nucleotide synthesis.
Aspartate aminotransferase	4	4.20627	0.207774	A0A1U7QCY5	Custom	http://www.uniprot.org/uniprot/A0A1U7QCY5	Got1
neutrophilic granule protein-like	3	2.45794	0.208474	A0A1U7RAM8	Custom	http://www.uniprot.org/uniprot/A0A1U7RAM8	LOC101829690	Secreted
collagen alpha-4(IV) chain	5	2.76275	0.209833	A0A3Q0DBP5	Custom	http://www.uniprot.org/uniprot/A0A3Q0DBP5	Col4a4	Membrane	Type IV collagen is the major structural component of glomerular basement membranes (GBM), forming a 'chicken-wire' meshwork together with laminins, proteoglycans and entactin/nidogen.
serpin B9	3	1.54876	0.210316	A0A3Q0CJ51	Custom	http://www.uniprot.org/uniprot/A0A3Q0CJ51	LOC101835557
Transgelin	7	0.456499	0.212204	A0A1U7QPL5	Custom	http://www.uniprot.org/uniprot/A0A1U7QPL5	Tagln2
nephronectin isoform X3	1	0.742187	0.214447	A0A1U8CNS2	Custom	http://www.uniprot.org/uniprot/A0A1U8CNS2	Npnt
Kinesin-like protein	1	0.629779	0.215333	A0A3Q0DH51	Custom	http://www.uniprot.org/uniprot/A0A3Q0DH51	Kif5b
Aspartyl aminopeptidase	3	1.18933	0.215338	A0A1U8BZX4	Custom	http://www.uniprot.org/uniprot/A0A1U8BZX4	Dnpep
collagen alpha-1(XVI) chain isoform X4	5	1.70733	0.216075	A0A1U8CJ61	Custom	http://www.uniprot.org/uniprot/A0A1U8CJ61	Col16a1
lamin	37	0.326057	0.219012	A0A1U7QSX8	Custom	http://www.uniprot.org/uniprot/A0A1U7QSX8	Lmna
Lumican	7	24.9654	0.220322	A0A1U7Q4A8	Custom	http://www.uniprot.org/uniprot/A0A1U7Q4A8	Lum	Secreted
heterogeneous nuclear ribonucleoprotein U	6	0.314851	0.221174	A0A1U7QFZ3	Custom	http://www.uniprot.org/uniprot/A0A1U7QFZ3	Hnrnpu	Nucleus
Heterogeneous nuclear ribonucleoproteins A2/B1	5	2.39876	0.22445	A0A3Q0CCM9	Custom	http://www.uniprot.org/uniprot/A0A3Q0CCM9	Hnrnpa2b1	Cytoplasmic granule
periplakin	2	1.41728	0.225971	A0A3Q0DA40	Custom	http://www.uniprot.org/uniprot/A0A3Q0DA40	Ppl	Cytoplasm
protein-glutamine gamma-glutamyltransferase 2	10	3.83883	0.227431	A0A1U7R7M7	Custom	http://www.uniprot.org/uniprot/A0A1U7R7M7	Tgm2
myosin-7	10	0.473924	0.230243	A0A3Q0DGW4	Custom	http://www.uniprot.org/uniprot/A0A3Q0DGW4	LOC106022467
Succinate dehydrogenase [ubiquinone] flavoprotein subunit, mitochondrial	8	1.60971	0.2327	A0A1U7Q7V2	Custom	http://www.uniprot.org/uniprot/A0A1U7Q7V2	Sdha	Mitochondrion inner membrane	Flavoprotein (FP) subunit of succinate dehydrogenase (SDH) that is involved in complex II of the mitochondrial electron transport chain and is responsible for transferring electrons from succinate to ubiquinone (coenzyme Q).
ras-related protein R-Ras2	2	1.24612	0.235696	A0A1U7QN56	Custom	http://www.uniprot.org/uniprot/A0A1U7QN56	Rras2
GTPase IMAP family member 4 isoform X2	3	0.214341	0.235815	A0A1U7R479	Custom	http://www.uniprot.org/uniprot/A0A1U7R479	LOC101830572
actin, cytoplasmic 1	18	0.75564	0.241682	A0A1U7Q273	Custom	http://www.uniprot.org/uniprot/A0A1U7Q273	Actb
H(+)-transporting two-sector ATPase	4	2.10706	0.243464	A0A1U8BYP2	Custom	http://www.uniprot.org/uniprot/A0A1U8BYP2	Atp6v1a
Succinate--CoA ligase [GDP-forming] subunit beta, mitochondrial	5	0.468038	0.245459	A0A3Q0CRY9	Custom	http://www.uniprot.org/uniprot/A0A3Q0CRY9	Suclg2	Mitochondrion	GTP-specific succinyl-CoA synthetase functions in the citric acid cycle (TCA), coupling the hydrolysis of succinyl-CoA to the synthesis of GTP and thus represents the only step of substrate-level phosphorylation in the TCA. The beta subunit provides nucleotide specificity of the enzyme and binds the substrate succinate, while the binding sites for coenzyme A and phosphate are found in the alpha s…
Tubulin beta chain	14	0.602508	0.248623	A0A1U7R7I2	Custom	http://www.uniprot.org/uniprot/A0A1U7R7I2	Tubb	Cytoplasm	Tubulin is the major constituent of microtubules. It binds two moles of GTP, one at an exchangeable site on the beta chain and one at a non-exchangeable site on the alpha chain.
L-lactate dehydrogenase	2	1.90907	0.249177	A0A1U7R9P7	Custom	http://www.uniprot.org/uniprot/A0A1U7R9P7	LOC101835564
14-3-3 protein theta	3	1.42989	0.249893	A0A3Q0DA60	Custom	http://www.uniprot.org/uniprot/A0A3Q0DA60	Ywhaq	Cytoplasm
Protein S100	6	4.8546	0.251138	A0A1U7R3M2	Custom	http://www.uniprot.org/uniprot/A0A1U7R3M2	LOC101828213
tensin-1 isoform X2	5	0.422907	0.251781	A0A3Q0CQS7	Custom	http://www.uniprot.org/uniprot/A0A3Q0CQS7	Tns1	Cell junction
EH domain-containing protein 4	3	1.85214	0.252232	A0A1U7Q5E9	Custom	http://www.uniprot.org/uniprot/A0A1U7Q5E9	Ehd4	Cell membrane
C3/C5 convertase	2	14.2811	0.252916	A0A3Q0CE80	Custom	http://www.uniprot.org/uniprot/A0A3Q0CE80	C2	Secreted
GMP reductase	2	0.399664	0.257181	A0A1U7REQ2	Custom	http://www.uniprot.org/uniprot/A0A1U7REQ2	Gmpr2		Catalyzes the irreversible NADPH-dependent deamination of GMP to IMP. It functions in the conversion of nucleobase, nucleoside and nucleotide derivatives of G to A nucleotides, and in maintaining the intracellular balance of A and G nucleotides.
laminin subunit gamma-1	23	0.330252	0.257952	A0A1U7QD11	Custom	http://www.uniprot.org/uniprot/A0A1U7QD11	Lamc1	Membrane
unconventional myosin-Ic	9	0.400054	0.259014	A0A1U8D3I2	Custom	http://www.uniprot.org/uniprot/A0A1U8D3I2	LOC106022802
platelet endothelial cell adhesion molecule	10	3.80027	0.260986	A0A1U8BYQ6	Custom	http://www.uniprot.org/uniprot/A0A1U8BYQ6	Pecam1
Galectin-3-binding protein	8	14.1005	0.261917	A0A1U7Q3N9	Custom	http://www.uniprot.org/uniprot/A0A1U7Q3N9	Lgals3bp	Secreted
Enoyl-CoA hydratase	7	2.62365	0.262791	A0A1U7QS51	Custom	http://www.uniprot.org/uniprot/A0A1U7QS51	Hadha
complement component C1q receptor	2	0.514741	0.263056	A0A1U7QTA0	Custom	http://www.uniprot.org/uniprot/A0A1U7QTA0	Cd93
talin-1	67	0.457222	0.263662	A0A1U7R141	Custom	http://www.uniprot.org/uniprot/A0A1U7R141	Tln1	Cytoplasm
spectrin alpha chain, erythrocytic 1	10	0.32395	0.265179	A0A1U7R2R1	Custom	http://www.uniprot.org/uniprot/A0A1U7R2R1	Spta1
scavenger receptor cysteine-rich type 1 protein M130	3	8.30517	0.266456	A0A3Q0CI20	Custom	http://www.uniprot.org/uniprot/A0A3Q0CI20	Cd163
heat shock protein HSP 90-beta	18	1.49631	0.273016	A0A3Q0CU68	Custom	http://www.uniprot.org/uniprot/A0A3Q0CU68	Hsp90ab1	Melanosome
Alpha-2-HS-glycoprotein	10	1.66965	0.275616	A0A1U8BVC5	Custom	http://www.uniprot.org/uniprot/A0A1U8BVC5	Ahsg	Secreted
Integrin beta	8	2.33412	0.276407	A0A1U8BT74	Custom	http://www.uniprot.org/uniprot/A0A1U8BT74	Itgb2	Membrane
6-phosphogluconate dehydrogenase, decarboxylating	9	0.0833729	0.277239	A0A1U7QRI5	Custom	http://www.uniprot.org/uniprot/A0A1U7QRI5	Pgd		Catalyzes the oxidative decarboxylation of 6-phosphogluconate to ribulose 5-phosphate and CO(2), with concomitant reduction of NADP to NADPH.
Agrin	5	0.289397	0.277936	A0A1U7QHT7	Custom	http://www.uniprot.org/uniprot/A0A1U7QHT7	Agrn
Nucleoside diphosphate kinase	4	0.126902	0.27914	A0A1U7QC34	Custom	http://www.uniprot.org/uniprot/A0A1U7QC34	LOC101838863
Tubulin alpha chain (Fragment)	4	0.522398	0.282013	D7RXW0	Custom	http://www.uniprot.org/uniprot/D7RXW0		Cytoplasm	Tubulin is the major constituent of microtubules. It binds two moles of GTP, one at an exchangeable site on the beta chain and one at a non-exchangeable site on the alpha chain.
lamin-B2 isoform X1	3	0.0742069	0.283426	A0A1U7RAW2	Custom	http://www.uniprot.org/uniprot/A0A1U7RAW2	Lmnb2
Prohibitin	3	2.13456	0.283736	A0A1U7QNJ2	Custom	http://www.uniprot.org/uniprot/A0A1U7QNJ2	Phb	Cell membrane
advanced glycosylation end product-specific receptor	14	0.653347	0.286865	A0A1U8CP48	Custom	http://www.uniprot.org/uniprot/A0A1U8CP48	Ager
Vacuolar proton pump subunit B	2	0.806349	0.288235	A0A1U7QUX4	Custom	http://www.uniprot.org/uniprot/A0A1U7QUX4	Atp6v1b2		Non-catalytic subunit of the peripheral V1 complex of vacuolar ATPase.
Annexin	19	0.482258	0.290895	A0A1U7QAC5	Custom	http://www.uniprot.org/uniprot/A0A1U7QAC5	Anxa6	Melanosome
Hemoglobin subunit zeta	2	7.76412	0.29259	A0A1U7R5T9	Custom	http://www.uniprot.org/uniprot/A0A1U7R5T9	LOC101836558		The zeta chain is an alpha-type chain of mammalian embryonic hemoglobin.
Catalase	9	0.712668	0.292788	A0A1U7Q360	Custom	http://www.uniprot.org/uniprot/A0A1U7Q360	Cat	Peroxisome	Occurs in almost all aerobically respiring organisms and serves to protect cells from the toxic effects of hydrogen peroxide.
prolow-density lipoprotein receptor-related protein 1	7	0.215725	0.293643	A0A3Q0D6C3	Custom	http://www.uniprot.org/uniprot/A0A3Q0D6C3	Lrp1	Membrane
immunoglobulin lambda-1 light chain-like isoform X4	2	8.83121	0.293703	A0A3Q0D3A4	Custom	http://www.uniprot.org/uniprot/A0A3Q0D3A4	LOC101841371
S-formylglutathione hydrolase	2	0.119166	0.294127	A0A1U8C186	Custom	http://www.uniprot.org/uniprot/A0A1U8C186	Esd	Cytoplasm	Serine hydrolase involved in the detoxification of formaldehyde.
utrophin isoform X4	3	0.520872	0.294468	A0A1U8CTC8	Custom	http://www.uniprot.org/uniprot/A0A1U8CTC8	Utrn	Cell junction
Creatine kinase	5	0.358262	0.294948	A0A1U7QAY3	Custom	http://www.uniprot.org/uniprot/A0A1U7QAY3	Ckb
serpin B6	2	0.0481895	0.296008	A0A3Q0CE42	Custom	http://www.uniprot.org/uniprot/A0A3Q0CE42	LOC101842215
60S ribosomal protein L9	2	0.562238	0.300682	A0A1U7QA51	Custom	http://www.uniprot.org/uniprot/A0A1U7QA51	Rpl9
leukocyte elastase inhibitor	12	1.3153	0.301079	A0A1U8BR26	Custom	http://www.uniprot.org/uniprot/A0A1U8BR26	Serpinb1
Peptidyl-prolyl cis-trans isomerase	2	0.204282	0.301188	A0A1U7Q7P9	Custom	http://www.uniprot.org/uniprot/A0A1U7Q7P9	LOC101837686		PPIases accelerate the folding of proteins. It catalyzes the cis-trans isomerization of proline imidic peptide bonds in oligopeptides.
Spectrin beta chain	37	0.460303	0.301739	A0A1U8BZS2	Custom	http://www.uniprot.org/uniprot/A0A1U8BZS2	Sptbn1
drebrin-like protein	4	5.75574	0.302536	A0A1U7QVD8	Custom	http://www.uniprot.org/uniprot/A0A1U7QVD8	Dbnl	Cell junction
Phosphoinositide phospholipase C	5	0.186259	0.303076	A0A1U7R9D1	Custom	http://www.uniprot.org/uniprot/A0A1U7R9D1	Plcd1
elongation factor 2	17	0.329256	0.303553	A0A1U7RB44	Custom	http://www.uniprot.org/uniprot/A0A1U7RB44	Eef2
tropomyosin beta chain isoform X3	5	7.04397	0.307676	A0A1U8C992	Custom	http://www.uniprot.org/uniprot/A0A1U8C992	Tpm2	Cytoplasm
Dimethylaniline monooxygenase [N-oxide-forming]	4	0.127674	0.308211	A0A1U7QFV1	Custom	http://www.uniprot.org/uniprot/A0A1U7QFV1	Fmo2	Endoplasmic reticulum membrane
Septin-7	3	0.549231	0.308331	A0A1U7R393	Custom	http://www.uniprot.org/uniprot/A0A1U7R393	44446	Cell projection
echinoderm microtubule-associated protein-like 2 isoform X4	4	0.207774	0.308903	A0A1U8CN01	Custom	http://www.uniprot.org/uniprot/A0A1U8CN01	Eml2	Cytoplasm
AP complex subunit beta	3	472.353	0.309532	A0A1U7QQA6	Custom	http://www.uniprot.org/uniprot/A0A1U7QQA6	Ap2b1
Clathrin heavy chain	23	0.414308	0.310047	A0A1U7QDR7	Custom	http://www.uniprot.org/uniprot/A0A1U7QDR7	Cltc	Cytoplasmic vesicle membrane	Clathrin is the major protein of the polyhedral coat of coated pits and vesicles.
LIM and SH3 domain protein 1	3	0.564921	0.312286	A0A3Q0D153	Custom	http://www.uniprot.org/uniprot/A0A3Q0D153	Lasp1	Cytoplasm
Maillard deglycase	4	0.170574	0.31261	A0A1U7Q2G1	Custom	http://www.uniprot.org/uniprot/A0A1U7Q2G1	Park7	Cell membrane
Annexin	5	0.574814	0.314147	A0A1U7QSR7	Custom	http://www.uniprot.org/uniprot/A0A1U7QSR7	Anxa11
LOW QUALITY PROTEIN: myosin-14	35	0.416958	0.314197	A0A3Q0DF64	Custom	http://www.uniprot.org/uniprot/A0A3Q0DF64	Myh14
Thrombomodulin	6	0.663471	0.315603	A0A1U7QHW5	Custom	http://www.uniprot.org/uniprot/A0A1U7QHW5	Thbd	Membrane
neutral alpha-glucosidase AB isoform X2	7	0.182887	0.316906	A0A1U7Q657	Custom	http://www.uniprot.org/uniprot/A0A1U7Q657	Ganab
Vimentin	41	0.584768	0.31753	A0A1U7QL88	Custom	http://www.uniprot.org/uniprot/A0A1U7QL88	Vim	Cell membrane	Involved with LARP6 in the stabilization of type I collagen mRNAs for CO1A1 and CO1A2.
myosin-11	4	0.28329	0.31895	A0A3Q0D2E6	Custom	http://www.uniprot.org/uniprot/A0A3Q0D2E6	Myh11
Citrate synthase	7	0.259491	0.319294	A0A1U7QV33	Custom	http://www.uniprot.org/uniprot/A0A1U7QV33	Cs	Mitochondrion matrix
Dipeptidylpeptidase 4	5	0.634346	0.321507	A0A075TJ59	Custom	http://www.uniprot.org/uniprot/A0A075TJ59	DPP4	Cell membrane
sorcin isoform X2	2	4.26183	0.322813	A0A1U7QYZ8	Custom	http://www.uniprot.org/uniprot/A0A1U7QYZ8	Sri
cytochrome b-c1 complex subunit 2, mitochondrial	3	4.35694	0.324687	A0A1U7QC43	Custom	http://www.uniprot.org/uniprot/A0A1U7QC43	LOC101834409
Metavinculin	47	0.555545	0.324803	A0A1U7R8T5	Custom	http://www.uniprot.org/uniprot/A0A1U7R8T5	Vcl	Cell junction
15-oxoprostaglandin 13-reductase	2	0.193057	0.325101	A0A3Q0DB32	Custom	http://www.uniprot.org/uniprot/A0A3Q0DB32	Ptgr1
Leukotriene A(4) hydrolase	10	0.187217	0.325134	A0A1U8BVR2	Custom	http://www.uniprot.org/uniprot/A0A1U8BVR2	Lta4h	Cytoplasm
3-hydroxyacyl-[acyl-carrier-protein] dehydratase	16	0.473457	0.325356	A0A1U7QAS8	Custom	http://www.uniprot.org/uniprot/A0A1U7QAS8	Fasn		Fatty acid synthetase is a multifunctional enzyme that catalyzes the de novo biosynthesis of long-chain saturated fatty acids starting from acetyl-CoA and malonyl-CoA in the presence of NADPH. This multifunctional protein contains 7 catalytic activities and a site for the binding of the prosthetic group 4'-phosphopantetheine of the acyl carrier protein ([ACP]) domain.
60S ribosomal protein L17	2	0.236329	0.325785	A0A1U7QD10	Custom	http://www.uniprot.org/uniprot/A0A1U7QD10	LOC101829440
myosin-10	18	0.143217	0.326189	A0A1U7QA56	Custom	http://www.uniprot.org/uniprot/A0A1U7QA56	Myh10
plastin-3 isoform X3	9	0.159048	0.330459	A0A1U8CQ17	Custom	http://www.uniprot.org/uniprot/A0A1U8CQ17	Pls3
Carbonic anhydrase	10	0.53048	0.331745	A0A1U7Q3W6	Custom	http://www.uniprot.org/uniprot/A0A1U7Q3W6	Ca2		Reversible hydration of carbon dioxide.
phosphatidylethanolamine-binding protein 1	8	0.785786	0.335188	A0A3Q0D5J7	Custom	http://www.uniprot.org/uniprot/A0A3Q0D5J7	Pebp1
nidogen-1	15	0.578269	0.335318	A0A1U7QPE1	Custom	http://www.uniprot.org/uniprot/A0A1U7QPE1	Nid1	Membrane
Alpha-1-inhibitor III (Fragment)	18	4.84796	0.337509	Q7M0B0	Custom	http://www.uniprot.org/uniprot/Q7M0B0
Heterogeneous nuclear ribonucleoprotein K	6	4.09045	0.33791	A0A1U7QSW4	Custom	http://www.uniprot.org/uniprot/A0A1U7QSW4	Hnrnpk	Cell projection
Albumin (Fragment)	19	1.40469	0.338592	A6YF57	Custom	http://www.uniprot.org/uniprot/A6YF57		Secreted
alpha-1-inhibitor 3-like	16	3.02372	0.338809	A0A1U8BEB6	Custom	http://www.uniprot.org/uniprot/A0A1U8BEB6	LOC101843823	Secreted
Malate dehydrogenase	7	0.676008	0.33969	A0A1U7QJU2	Custom	http://www.uniprot.org/uniprot/A0A1U7QJU2	Mdh2
Cysteinylglycine-S-conjugate dipeptidase	11	1.61703	0.340414	A0A1U7Q4Q8	Custom	http://www.uniprot.org/uniprot/A0A1U7Q4Q8	Lap3
Thioredoxin	4	1.58043	0.340427	A0A1U7R0Q7	Custom	http://www.uniprot.org/uniprot/A0A1U7R0Q7	LOC101840972
collagen alpha-2(IV) chain	3	0.055958	0.340693	A0A1U7R6S5	Custom	http://www.uniprot.org/uniprot/A0A1U7R6S5	LOC101843198	Membrane	Type IV collagen is the major structural component of glomerular basement membranes (GBM), forming a 'chicken-wire' meshwork together with laminins, proteoglycans and entactin/nidogen.
14-3-3 protein beta/alpha	7	1.88536	0.341154	A0A3Q0DAZ8	Custom	http://www.uniprot.org/uniprot/A0A3Q0DAZ8	Ywhab	Cytoplasm
LOW QUALITY PROTEIN: glyceraldehyde-3-phosphate dehydrogenase-like	5	0.229926	0.341797	A0A3Q0CTN9	Custom	http://www.uniprot.org/uniprot/A0A3Q0CTN9	LOC101843221
Tyrosine-protein phosphatase non-receptor type	2	3.28536	0.342118	A0A3Q0CDC7	Custom	http://www.uniprot.org/uniprot/A0A3Q0CDC7	Ptpn6	Cytoplasm
probable aminopeptidase NPEPL1	2	3.28216	0.342444	A0A1U7QTS1	Custom	http://www.uniprot.org/uniprot/A0A1U7QTS1	Npepl1
thioredoxin-dependent peroxide reductase, mitochondrial	3	4.96013	0.342503	A0A1U7RE88	Custom	http://www.uniprot.org/uniprot/A0A1U7RE88	Prdx3	Cytoplasm
poly(RC)-binding protein 1	6	2.6358	0.343219	A0A1U7QFH5	Custom	http://www.uniprot.org/uniprot/A0A1U7QFH5	Pcbp1
beta-actin-like protein 2 isoform X1	8	2.39755	0.346441	A0A1U7QGH6	Custom	http://www.uniprot.org/uniprot/A0A1U7QGH6	Actbl2
radixin	9	0.596404	0.347094	A0A3Q0CPH8	Custom	http://www.uniprot.org/uniprot/A0A3Q0CPH8	Rdx	Cell membrane
Spectrin beta chain	7	0.275089	0.3473	A0A3Q0CUP9	Custom	http://www.uniprot.org/uniprot/A0A3Q0CUP9	Sptb
ribosome-binding protein 1	7	0.569164	0.348514	A0A3Q0CNC7	Custom	http://www.uniprot.org/uniprot/A0A3Q0CNC7	Rrbp1
Carboxylic ester hydrolase	2	0.261403	0.349552	A0A1U7QP22	Custom	http://www.uniprot.org/uniprot/A0A1U7QP22	LOC101841093
Microtubule-associated protein	5	5.87202	0.349606	A0A1U8CA38	Custom	http://www.uniprot.org/uniprot/A0A1U8CA38	Map4	Cytoplasm
transcriptional activator protein Pur-alpha	3	4.46633	0.349897	A0A3Q0D6Q5	Custom	http://www.uniprot.org/uniprot/A0A3Q0D6Q5	Pura	Nucleus
peroxiredoxin-2	9	1.76675	0.349922	A0A1U7RHE5	Custom	http://www.uniprot.org/uniprot/A0A1U7RHE5	Prdx2	Cytoplasm	Thiol-specific peroxidase that catalyzes the reduction of hydrogen peroxide and organic hydroperoxides to water and alcohols, respectively.
40S ribosomal protein S8	5	0.255794	0.350193	A0A1U7QH16	Custom	http://www.uniprot.org/uniprot/A0A1U7QH16	Rps8
stress-induced-phosphoprotein 1 isoform X2	2	0.278608	0.351202	A0A1U7Q2T6	Custom	http://www.uniprot.org/uniprot/A0A1U7Q2T6	Stip1
Fumarate hydratase, mitochondrial	5	0.26525	0.351227	A0A1U7R004	Custom	http://www.uniprot.org/uniprot/A0A1U7R004	Fh		Catalyzes the hydration of fumarate to L-malate in the tricarboxylic acid (TCA) cycle to facilitate a transition step in the production of energy in the form of NADH.
cytoskeleton-associated protein 4	4	0.273686	0.353097	A0A3Q0DD63	Custom	http://www.uniprot.org/uniprot/A0A3Q0DD63	Ckap4
guanine nucleotide-binding protein G(O) subunit alpha isoform X2	3	0.121318	0.353116	A0A1U7QHQ1	Custom	http://www.uniprot.org/uniprot/A0A1U7QHQ1	Gnao1
hydroxyacyl-coenzyme A dehydrogenase, mitochondrial	2	3.49762	0.354367	A0A3Q0DC82	Custom	http://www.uniprot.org/uniprot/A0A3Q0DC82	Hadh
cell surface glycoprotein MUC18 isoform X2	4	0.465345	0.355552	A0A1U8BXF0	Custom	http://www.uniprot.org/uniprot/A0A1U8BXF0	Mcam
Protein disulfide-isomerase A6	6	0.547037	0.357151	A0A1U7RB20	Custom	http://www.uniprot.org/uniprot/A0A1U7RB20	Pdia6	Endoplasmic reticulum lumen
nephronectin isoform X4	3	4.1255	0.357727	A0A1U7QMF3	Custom	http://www.uniprot.org/uniprot/A0A1U7QMF3	Npnt
Proteasome subunit beta	3	3.19741	0.358423	A0A1U7QA21	Custom	http://www.uniprot.org/uniprot/A0A1U7QA21	Psmb6	Cytoplasm	Component of the proteasome, a multicatalytic proteinase complex which is characterized by its ability to cleave peptides with Arg, Phe, Tyr, Leu, and Glu adjacent to the leaving group at neutral or slightly basic pH. The proteasome has an ATP-dependent proteolytic activity.
serpin B6-like	4	0.315762	0.364847	A0A3Q0CIX8	Custom	http://www.uniprot.org/uniprot/A0A3Q0CIX8	LOC110340235
EMILIN-1	2	0.355979	0.36555	A0A1U7QGQ0	Custom	http://www.uniprot.org/uniprot/A0A1U7QGQ0	Emilin1
catenin alpha-1	7	0.27381	0.366068	A0A1U7QDJ2	Custom	http://www.uniprot.org/uniprot/A0A1U7QDJ2	Ctnna1	Cell junction
histone H1.4	6	3.56931	0.369393	A0A1U7Q8Z0	Custom	http://www.uniprot.org/uniprot/A0A1U7Q8Z0	LOC101828346	Nucleus
Aminopeptidase	7	0.560824	0.370471	A0A3Q0CV25	Custom	http://www.uniprot.org/uniprot/A0A3Q0CV25	Npepps
Proton-translocating NAD(P)(+) transhydrogenase	6	0.357058	0.370481	A0A3Q0DC70	Custom	http://www.uniprot.org/uniprot/A0A3Q0DC70	Nnt
filamin-B isoform X3	5	0.0165308	0.370484	A0A1U7R1A1	Custom	http://www.uniprot.org/uniprot/A0A1U7R1A1	Flnb
Protein disulfide-isomerase	17	0.70292	0.371158	A0A1U7QAU1	Custom	http://www.uniprot.org/uniprot/A0A1U7QAU1	P4hb	Endoplasmic reticulum lumen
tropomyosin alpha-1 chain isoform X18	1	0.292428	0.371279	A0A1U7QY61	Custom	http://www.uniprot.org/uniprot/A0A1U7QY61	Tpm1	Cytoplasm
ADP/ATP translocase	5	0.554193	0.371802	A0A3Q0DCV8	Custom	http://www.uniprot.org/uniprot/A0A3Q0DCV8	Slc25a5	Membrane	Catalyzes the exchange of ADP and ATP across the membrane.
Actin-like protein 3	7	0.698248	0.373625	A0A3Q0D7D7	Custom	http://www.uniprot.org/uniprot/A0A3Q0D7D7	Actr3	Cell projection
Elongation factor 1-alpha	7	2.18914	0.374149	A0A1U7Q9F2	Custom	http://www.uniprot.org/uniprot/A0A1U7Q9F2	Eef1a1		This protein promotes the GTP-dependent binding of aminoacyl-tRNA to the A-site of ribosomes during protein biosynthesis.
cullin-associated NEDD8-dissociated protein 1	3	0.27614	0.376273	A0A1U7RIK2	Custom	http://www.uniprot.org/uniprot/A0A1U7RIK2	LOC101840342
60S ribosomal protein L4	2	0.0161436	0.378502	A0A3Q0CUL4	Custom	http://www.uniprot.org/uniprot/A0A3Q0CUL4	Rpl4
hematopoietic progenitor cell antigen CD34 isoform X1	2	5.65964	0.380089	A0A1U7R7X1	Custom	http://www.uniprot.org/uniprot/A0A1U7R7X1	Cd34	Membrane
collagen alpha-1(XI) chain	5	2.28264	0.380189	A0A3Q0CD18	Custom	http://www.uniprot.org/uniprot/A0A3Q0CD18	Col11a1
pulmonary surfactant-associated protein A	4	1.43102	0.382686	A0A3Q0D8R7	Custom	http://www.uniprot.org/uniprot/A0A3Q0D8R7	LOC101835350
trifunctional enzyme subunit beta, mitochondrial	4	3.80025	0.385469	A0A1U7QUW5	Custom	http://www.uniprot.org/uniprot/A0A1U7QUW5	Hadhb
brain acid soluble protein 1	2	1.2312	0.387295	A0A1U7QXQ6	Custom	http://www.uniprot.org/uniprot/A0A1U7QXQ6	Basp1
keratin, type I cytoskeletal 19 isoform X1	11	0.4068	0.389509	A0A1U7QWJ5	Custom	http://www.uniprot.org/uniprot/A0A1U7QWJ5	Krt19
integrin alpha-3 isoform X2	4	3.36264	0.393586	A0A1U7QC50	Custom	http://www.uniprot.org/uniprot/A0A1U7QC50	Itga3	Membrane
75 kDa glucose-regulated protein	7	2.52898	0.393865	A0A3Q0DB92	Custom	http://www.uniprot.org/uniprot/A0A3Q0DB92	Hspa9
myeloperoxidase	3	33.1105	0.39442	A0A1U8CBY9	Custom	http://www.uniprot.org/uniprot/A0A1U8CBY9	Mpo
Cell division control protein 42 homolog	6	1.66216	0.397392	A0A1U7QUA0	Custom	http://www.uniprot.org/uniprot/A0A1U7QUA0	Cdc42	Cell membrane	Plasma membrane-associated small GTPase which cycles between an active GTP-bound and an inactive GDP-bound state.
Milk fat globule-EGF factor 8 (Fragment)	3	1.99994	0.397481	E2GMV3	Custom	http://www.uniprot.org/uniprot/E2GMV3
UTP--glucose-1-phosphate uridylyltransferase	1	1.92998	0.399396	A0A1U8BNU7	Custom	http://www.uniprot.org/uniprot/A0A1U8BNU7	Ugp2		UTP--glucose-1-phosphate uridylyltransferase catalyzing the conversion of glucose-1-phosphate into UDP-glucose, a crucial precursor for the production of glycogen.
40S ribosomal protein S2	5	1.77042	0.40044	A0A1U8D127	Custom	http://www.uniprot.org/uniprot/A0A1U8D127	LOC101834330
tropomyosin alpha-1 chain isoform X7	2	1.82386	0.401492	A0A1U7QMW6	Custom	http://www.uniprot.org/uniprot/A0A1U7QMW6	Tpm1	Cytoplasm
60S ribosomal protein L14	3	0.405608	0.4025	A0A1U7R751	Custom	http://www.uniprot.org/uniprot/A0A1U7R751	Rpl14
lipoma-preferred partner homolog	3	0.032373	0.403057	A0A1U7Q7E8	Custom	http://www.uniprot.org/uniprot/A0A1U7Q7E8	LOC101828273
Chloride intracellular channel protein	6	1.42382	0.404051	A0A3Q0CNL7	Custom	http://www.uniprot.org/uniprot/A0A3Q0CNL7	Clic5	Membrane
alpha-actinin-1	5	0.506075	0.404256	A0A3Q0CUX4	Custom	http://www.uniprot.org/uniprot/A0A3Q0CUX4	Actn1
serine protease inhibitor A3N-like	6	2.25619	0.405204	A0A3Q0CH40	Custom	http://www.uniprot.org/uniprot/A0A3Q0CH40	LOC110340613
aminopeptidase B	5	0.48887	0.405331	A0A1U7QRZ7	Custom	http://www.uniprot.org/uniprot/A0A1U7QRZ7	Rnpep
fermitin family homolog 2 isoform X6	5	1.31033	0.406003	A0A1U7RCF8	Custom	http://www.uniprot.org/uniprot/A0A1U7RCF8	Fermt2
complement C5	2	1.79793	0.407646	A0A3Q0DAY1	Custom	http://www.uniprot.org/uniprot/A0A3Q0DAY1	LOC101837460
40S ribosomal protein S3a	6	1.22189	0.409019	A0A3Q0C8R6	Custom	http://www.uniprot.org/uniprot/A0A3Q0C8R6	LOC101822898	Cytoplasm	May play a role during erythropoiesis through regulation of transcription factor DDIT3.
endoplasmin	10	1.45274	0.409236	A0A1U7Q8T8	Custom	http://www.uniprot.org/uniprot/A0A1U7Q8T8	Hsp90b1	Melanosome
Intercellular adhesion molecule 1 (Fragment)	7	1.00448	0.409747	Q4FCR4	Custom	http://www.uniprot.org/uniprot/Q4FCR4
Gamma actin cytoplasmic 1 (Fragment)	2	0.521134	0.409878	C1JJG4	Custom	http://www.uniprot.org/uniprot/C1JJG4
Sodium/potassium-transporting ATPase subunit alpha	9	0.611294	0.410576	A0A1U7QLM8	Custom	http://www.uniprot.org/uniprot/A0A1U7QLM8	Atp1a1	Membrane
Histone H3	6	0.917609	0.41064	A0A1U7QAA4	Custom	http://www.uniprot.org/uniprot/A0A1U7QAA4	LOC101828432
methyltransferase-like protein 7A isoform X1	4	0.515081	0.412561	A0A1U7QJC4	Custom	http://www.uniprot.org/uniprot/A0A1U7QJC4	LOC101825898
Flavin-containing monooxygenase	7	0.372723	0.413317	A0A1U8BUP3	Custom	http://www.uniprot.org/uniprot/A0A1U8BUP3	Fmo2	Endoplasmic reticulum membrane
far upstream element-binding protein 2	6	0.600889	0.414497	A0A3Q0D8D4	Custom	http://www.uniprot.org/uniprot/A0A3Q0D8D4	Khsrp	Nucleus
Glutamyl-tRNA synthetase	2	0.489957	0.41726	A0A1U7QZH9	Custom	http://www.uniprot.org/uniprot/A0A1U7QZH9	Eprs
60S ribosomal protein L7a	4	0.584042	0.418102	A0A1U7QVT6	Custom	http://www.uniprot.org/uniprot/A0A1U7QVT6	LOC101841383		Component of the ribosome.
tensin-4	2	1.61063	0.418513	A0A1U7QW91	Custom	http://www.uniprot.org/uniprot/A0A1U7QW91	Tns4	Cell junction
microfibril-associated glycoprotein 4 isoform X2	2	2.27831	0.418789	A0A1U7QA78	Custom	http://www.uniprot.org/uniprot/A0A1U7QA78	Mfap4
Isocitrate dehydrogenase [NAD] subunit, mitochondrial	2	50.4186	0.419337	A0A1U8CSV7	Custom	http://www.uniprot.org/uniprot/A0A1U8CSV7	LOC101843465	Mitochondrion
matrix metalloproteinase-14	2	#DIV/0!	0.42265	A0A1U7RC32	Custom	http://www.uniprot.org/uniprot/A0A1U7RC32	Mmp14
guanylate-binding protein 2-like	1	#DIV/0!	0.42265	A0A1U7QVQ2	Custom	http://www.uniprot.org/uniprot/A0A1U7QVQ2	LOC101824821
sterile alpha motif domain-containing protein 9-like	1	#DIV/0!	0.42265	A0A1U7RAB5	Custom	http://www.uniprot.org/uniprot/A0A1U7RAB5	LOC101838199
Elastin	1	#DIV/0!	0.42265	A0A1U8CCM2	Custom	http://www.uniprot.org/uniprot/A0A1U8CCM2	Eln	Secreted
transcription factor SOX-6 isoform X5	1	#DIV/0!	0.42265	A0A3Q0D0W5	Custom	http://www.uniprot.org/uniprot/A0A3Q0D0W5	Sox6
interferon-induced GTP-binding protein Mx1	1	#DIV/0!	0.42265	A0A3Q0CWV5	Custom	http://www.uniprot.org/uniprot/A0A3Q0CWV5	LOC101844121
MPN domain-containing protein	1	#DIV/0!	0.42265	A0A1U7QLF5	Custom	http://www.uniprot.org/uniprot/A0A1U7QLF5	Mpnd
disintegrin and metalloproteinase domain-containing protein 9	1	#DIV/0!	0.42265	A0A1U7QFM4	Custom	http://www.uniprot.org/uniprot/A0A1U7QFM4	Adam9
calcium-binding mitochondrial carrier protein SCaMC-2 isoform X2	1	#DIV/0!	0.42265	A0A3Q0CFY5	Custom	http://www.uniprot.org/uniprot/A0A3Q0CFY5	Slc25a25	Membrane
hydroxysteroid dehydrogenase-like protein 2	2	#DIV/0!	0.42265	A0A3Q0DGZ7	Custom	http://www.uniprot.org/uniprot/A0A3Q0DGZ7	Hsdl2	Peroxisome
arginine-hydroxylase NDUFAF5, mitochondrial isoform X2	2	#DIV/0!	0.42265	A0A1U8BVZ4	Custom	http://www.uniprot.org/uniprot/A0A1U8BVZ4	Ndufaf5
Anaphase-promoting complex subunit 2	2	#DIV/0!	0.42265	A0A1U7QYI3	Custom	http://www.uniprot.org/uniprot/A0A1U7QYI3	Anapc2
collagen alpha-2(XI) chain	2	#DIV/0!	0.42265	A0A3Q0CAD5	Custom	http://www.uniprot.org/uniprot/A0A3Q0CAD5	Col11a2
Galectin (Fragment)	4	#DIV/0!	0.42265	H2EP73	Custom	http://www.uniprot.org/uniprot/H2EP73	Lgals1
Alpha-synuclein	2	#DIV/0!	0.42265	A0A1U8CC65	Custom	http://www.uniprot.org/uniprot/A0A1U8CC65	Snca	Cell junction
Inorganic diphosphatase	4	#DIV/0!	0.42265	A0A1U7QMX9	Custom	http://www.uniprot.org/uniprot/A0A1U7QMX9	Ppa1
fatty acid-binding protein, heart	2	#DIV/0!	0.42265	A0A1U7QRU7	Custom	http://www.uniprot.org/uniprot/A0A1U7QRU7	Fabp3
Peptidyl-prolyl cis-trans isomerase	2	#DIV/0!	0.42265	A0A1U8BX84	Custom	http://www.uniprot.org/uniprot/A0A1U8BX84	LOC101822920		PPIases accelerate the folding of proteins. It catalyzes the cis-trans isomerization of proline imidic peptide bonds in oligopeptides.
carbonyl reductase [NADPH] 3	2	#DIV/0!	0.42265	A0A3Q0CWL9	Custom	http://www.uniprot.org/uniprot/A0A3Q0CWL9	LOC106021442
Adenylate kinase isoenzyme 1	1	#DIV/0!	0.42265	A0A1U7RHU6	Custom	http://www.uniprot.org/uniprot/A0A1U7RHU6	Ak1	Cytoplasm	Catalyzes the reversible transfer of the terminal phosphate group between ATP and AMP. Also displays broad nucleoside diphosphate kinase activity. Plays an important role in cellular energy homeostasis and in adenine nucleotide metabolism.
Peptidyl-prolyl cis-trans isomerase	2	#DIV/0!	0.42265	A0A1U7QK19	Custom	http://www.uniprot.org/uniprot/A0A1U7QK19	Ppib		PPIases accelerate the folding of proteins. It catalyzes the cis-trans isomerization of proline imidic peptide bonds in oligopeptides.
Putative hydroxypyruvate isomerase	2	#DIV/0!	0.42265	A0A1U8CK40	Custom	http://www.uniprot.org/uniprot/A0A1U8CK40	Hyi		Catalyzes the reversible isomerization between hydroxypyruvate and 2-hydroxy-3-oxopropanoate (also termed tartronate semialdehyde).
L-lactate dehydrogenase	2	#DIV/0!	0.42265	A0A1U7R669	Custom	http://www.uniprot.org/uniprot/A0A1U7R669	LOC101836091
heparin cofactor 2	2	#DIV/0!	0.42265	A0A1U7QNI5	Custom	http://www.uniprot.org/uniprot/A0A1U7QNI5	Serpind1
NSFL1 cofactor p47	2	#DIV/0!	0.42265	A0A1U7Q888	Custom	http://www.uniprot.org/uniprot/A0A1U7Q888	Nsfl1c	Golgi apparatus
pro-neuregulin-2, membrane-bound isoform	1	#DIV/0!	0.42265	A0A3Q0DAX9	Custom	http://www.uniprot.org/uniprot/A0A3Q0DAX9	Nrg2	Secreted
Prothrombin	1	#DIV/0!	0.42265	A0A1U7QFC8	Custom	http://www.uniprot.org/uniprot/A0A1U7QFC8	F2		Thrombin, which cleaves bonds after Arg and Lys, converts fibrinogen to fibrin and activates factors V, VII, VIII, XIII, and, in complex with thrombomodulin, protein C. Functions in blood homeostasis, inflammation and wound healing.
dipeptidyl peptidase 2	2	#DIV/0!	0.42265	A0A1U7QYH3	Custom	http://www.uniprot.org/uniprot/A0A1U7QYH3	Dpp7
cathepsin G-like	1	#DIV/0!	0.42265	A0A1U7QV66	Custom	http://www.uniprot.org/uniprot/A0A1U7QV66	LOC101822759
Seryl-tRNA synthetase	2	#DIV/0!	0.42265	A0A3Q0D1L2	Custom	http://www.uniprot.org/uniprot/A0A3Q0D1L2	Sars
ras-related protein Rab-5A	1	#DIV/0!	0.42265	A0A1U7QQE9	Custom	http://www.uniprot.org/uniprot/A0A1U7QQE9	Rab5a
dehydrogenase/reductase SDR family member 11	2	#DIV/0!	0.42265	A0A1U7QQ91	Custom	http://www.uniprot.org/uniprot/A0A1U7QQ91	Dhrs11
prosaposin isoform X3	2	#DIV/0!	0.42265	A0A1U8BPW9	Custom	http://www.uniprot.org/uniprot/A0A1U8BPW9	Psap	Secreted
Rho family-interacting cell polarization regulator 2	1	#DIV/0!	0.42265	A0A3Q0CJ08	Custom	http://www.uniprot.org/uniprot/A0A3Q0CJ08	Ripor2	Apical cell membrane
interferon-inducible GTPase 1-like	2	#DIV/0!	0.42265	A0A1U7RG56	Custom	http://www.uniprot.org/uniprot/A0A1U7RG56	LOC101838193
collagen alpha-2(VI) chain isoform X1	1	#DIV/0!	0.42265	A0A3Q0CQZ0	Custom	http://www.uniprot.org/uniprot/A0A3Q0CQZ0	Col6a2
Guanylate cyclase	1	0	0.42265	A0A1U7Q460	Custom	http://www.uniprot.org/uniprot/A0A1U7Q460	Gucy2d	Membrane
Transforming growth factor-beta-induced protein ig-h3	2	0	0.42265	A0A1U7QGF1	Custom	http://www.uniprot.org/uniprot/A0A1U7QGF1	Tgfbi	Secreted
filamin-C	1	0	0.42265	A0A3Q0D458	Custom	http://www.uniprot.org/uniprot/A0A3Q0D458	Flnc
RNA helicase	2	0	0.42265	A0A3Q0CK34	Custom	http://www.uniprot.org/uniprot/A0A3Q0CK34	LOC101834606
rho guanine nucleotide exchange factor 18 isoform X3	2	0	0.42265	A0A1U7RBH3	Custom	http://www.uniprot.org/uniprot/A0A1U7RBH3	Arhgef18	Cytoplasm
Kinesin light chain	2	0	0.42265	A0A1U8BW17	Custom	http://www.uniprot.org/uniprot/A0A1U8BW17	Klc2	Cytoplasm	Kinesin is a microtubule-associated force-producing protein that may play a role in organelle transport.
testis-expressed protein 10	1	0	0.42265	A0A1U7QQK2	Custom	http://www.uniprot.org/uniprot/A0A1U7QQK2	Tex10
microtubule-actin cross-linking factor 1 isoform X11	1	0	0.42265	A0A3Q0D9W0	Custom	http://www.uniprot.org/uniprot/A0A3Q0D9W0	Macf1	Cytoplasm
protein numb homolog isoform X4	2	0	0.42265	A0A1U8BXK2	Custom	http://www.uniprot.org/uniprot/A0A1U8BXK2	Numb		Plays a role in the process of neurogenesis.
Carboxylic ester hydrolase	1	0	0.42265	O35533	Custom	http://www.uniprot.org/uniprot/O35533
RBR-type E3 ubiquitin transferase	1	0	0.42265	A0A1U7QFB2	Custom	http://www.uniprot.org/uniprot/A0A1U7QFB2	Rnf19a
contactin-2	1	0	0.42265	A0A3Q0CF00	Custom	http://www.uniprot.org/uniprot/A0A3Q0CF00	Cntn2
Aldehyde dehydrogenase family 16 member A1	1	0	0.42265	A0A1U7RAP1	Custom	http://www.uniprot.org/uniprot/A0A1U7RAP1	Aldh16a1
CCR4-NOT transcription complex subunit 11	1	0	0.42265	A0A1U7QV81	Custom	http://www.uniprot.org/uniprot/A0A1U7QV81	Cnot11	Cytoplasm
collagen alpha-6(IV) chain	1	0	0.42265	A0A1U8CPT9	Custom	http://www.uniprot.org/uniprot/A0A1U8CPT9	Col4a6	Membrane	Type IV collagen is the major structural component of glomerular basement membranes (GBM), forming a 'chicken-wire' meshwork together with laminins, proteoglycans and entactin/nidogen.
Serine/threonine-protein phosphatase	1	0	0.42265	A0A1U7R8U7	Custom	http://www.uniprot.org/uniprot/A0A1U7R8U7	Ppp3ca
uncharacterized protein LOC106022116	2	0	0.42265	A0A3Q0D9Y4	Custom	http://www.uniprot.org/uniprot/A0A3Q0D9Y4	LOC106022116
2',5'-phosphodiesterase 12	2	0	0.42265	A0A1U7QF81	Custom	http://www.uniprot.org/uniprot/A0A1U7QF81	Pde12
ubiquitin carboxyl-terminal hydrolase 31	1	0	0.42265	A0A3Q0CW57	Custom	http://www.uniprot.org/uniprot/A0A3Q0CW57	Usp31
LOW QUALITY PROTEIN: heat shock protein HSP 90-beta-like	1	0	0.42265	A0A1U8BSL9	Custom	http://www.uniprot.org/uniprot/A0A1U8BSL9	LOC106020867
tropomyosin alpha-3 chain isoform X1	1	0	0.42265	A0A3Q0D6W3	Custom	http://www.uniprot.org/uniprot/A0A3Q0D6W3	Tpm3	Cytoplasm
Methionine synthase	1	0	0.42265	A0A1U8C3I1	Custom	http://www.uniprot.org/uniprot/A0A1U8C3I1	Mtr	Cytoplasm	Catalyzes the transfer of a methyl group from methylcob(III)alamin (MeCbl) to homocysteine, yielding enzyme-bound cob(I)alamin and methionine in the cytosol. MeCbl is an active form of cobalamin (vitamin B12) used as a cofactor for methionine biosynthesis. Cob(I)alamin form is regenerated to MeCbl by a transfer of a methyl group from 5-methyltetrahydrofolate. The processing of cobalamin in the cy…
tropomyosin alpha-1 chain isoform X6	1	0	0.42265	A0A1U7QVG1	Custom	http://www.uniprot.org/uniprot/A0A1U7QVG1	Tpm1	Cytoplasm
rho GDP-dissociation inhibitor 1	3	0	0.42265	A0A1U7Q5G4	Custom	http://www.uniprot.org/uniprot/A0A1U7Q5G4	Arhgdia
heterogeneous nuclear ribonucleoprotein L isoform X2	3	0	0.42265	A0A1U7RFN8	Custom	http://www.uniprot.org/uniprot/A0A1U7RFN8	Hnrnpl
alpha-actinin-2	1	0	0.42265	A0A1U7QYC2	Custom	http://www.uniprot.org/uniprot/A0A1U7QYC2	LOC101822458
Glutathione transferase class alpha A1 (Fragments)	1	0	0.42265	Q7M0F5	Custom	http://www.uniprot.org/uniprot/Q7M0F5
Biglycan	2	0	0.42265	A0A1U7RGR7	Custom	http://www.uniprot.org/uniprot/A0A1U7RGR7	Bgn	Secreted	May be involved in collagen fiber assembly.
sulfide:quinone oxidoreductase, mitochondrial	1	0	0.42265	A0A1U7QIV4	Custom	http://www.uniprot.org/uniprot/A0A1U7QIV4	Sqor
Hepatocyte growth factor-regulated tyrosine kinase substrate	1	0	0.42265	A0A1U8BNE5	Custom	http://www.uniprot.org/uniprot/A0A1U8BNE5	Hgs	Cytoplasm	Involved in intracellular signal transduction mediated by cytokines and growth factors. When associated with STAM, it suppresses DNA signaling upon stimulation by IL-2 and GM-CSF. Could be a direct effector of PI3-kinase in vesicular pathway via early endosomes and may regulate trafficking to early and late endosomes by recruiting clathrin. May concentrate ubiquitinated receptors within clathrin-…
Core histone macro-H2A	1	0	0.42265	A0A1U7QGE6	Custom	http://www.uniprot.org/uniprot/A0A1U7QGE6	LOC101833610	Chromosome	Variant histone H2A which replaces conventional H2A in a subset of nucleosomes.
Protein misato homolog 1	1	0	0.42265	A0A3Q0D7K3	Custom	http://www.uniprot.org/uniprot/A0A3Q0D7K3	Msto1	Mitochondrion outer membrane
estradiol 17-beta-dehydrogenase 8	2	0	0.42265	A0A1U7RE95	Custom	http://www.uniprot.org/uniprot/A0A1U7RE95	Hsd17b8
Calcium-transporting ATPase	1	0	0.42265	A0A3Q0CVT5	Custom	http://www.uniprot.org/uniprot/A0A3Q0CVT5	Atp2b4	Membrane	This magnesium-dependent enzyme catalyzes the hydrolysis of ATP coupled with the transport of calcium.
microtubule-actin cross-linking factor 1 isoform X8	1	0	0.42265	A0A3Q0DDN8	Custom	http://www.uniprot.org/uniprot/A0A3Q0DDN8	Macf1	Cytoplasm
Phosphoglycerate mutase	1	#DIV/0!	0.42265	A0A3Q0CEZ5	Custom	http://www.uniprot.org/uniprot/A0A3Q0CEZ5	Pgam1
collagen alpha-1(VIII) chain	1	#DIV/0!	0.42265	A0A1U7QM18	Custom	http://www.uniprot.org/uniprot/A0A1U7QM18	Col8a1
Histone H3	1	#DIV/0!	0.42265	A0A1U7QAZ8	Custom	http://www.uniprot.org/uniprot/A0A1U7QAZ8	LOC101840088
chromosome transmission fidelity protein 18 homolog	1	#DIV/0!	0.42265	A0A3Q0D9K4	Custom	http://www.uniprot.org/uniprot/A0A3Q0D9K4	Chtf18
guanine nucleotide-binding protein G(K) subunit alpha	1	0	0.42265	A0A1U7QZZ8	Custom	http://www.uniprot.org/uniprot/A0A1U7QZZ8	Gnai3
cytokine receptor common subunit beta	1	0	0.42265	A0A1U7RAN5	Custom	http://www.uniprot.org/uniprot/A0A1U7RAN5	LOC101834442
Antithrombin-III	6	1.35706	0.423516	A0A3Q0CS80	Custom	http://www.uniprot.org/uniprot/A0A3Q0CS80	Serpinc1	Secreted
endoplasmic reticulum resident protein 44	2	0.0740561	0.423578	A0A1U7R0Z8	Custom	http://www.uniprot.org/uniprot/A0A1U7R0Z8	Erp44
heterogeneous nuclear ribonucleoprotein F	3	0.0648836	0.427451	A0A1U8BEQ4	Custom	http://www.uniprot.org/uniprot/A0A1U8BEQ4	Hnrnpf	Nucleus
Leucine zipper-EF-hand-containing transmembrane protein 1	2	1.53085	0.428066	A0A3Q0CNA2	Custom	http://www.uniprot.org/uniprot/A0A3Q0CNA2	Letm1	Membrane
keratin, type II cytoskeletal 7	9	0.676337	0.429727	A0A1U7Q9T5	Custom	http://www.uniprot.org/uniprot/A0A1U7Q9T5	LOC101833224
Clathrin light chain	1	1.32845	0.432408	A0A1U7R3R0	Custom	http://www.uniprot.org/uniprot/A0A1U7R3R0	Clta	Cytoplasmic vesicle membrane	Clathrin is the major protein of the polyhedral coat of coated pits and vesicles.
SH3 domain-binding glutamic acid-rich-like protein	2	1.4786	0.432763	A0A1U7QIF2	Custom	http://www.uniprot.org/uniprot/A0A1U7QIF2	Sh3bgrl3
tropomyosin alpha-3 chain isoform X9	3	0.730636	0.433518	A0A1U7QJJ6	Custom	http://www.uniprot.org/uniprot/A0A1U7QJJ6	Tpm3	Cytoplasm
Peptidoglycan-recognition protein	3	0.966645	0.434511	A0A1U7QUI9	Custom	http://www.uniprot.org/uniprot/A0A1U7QUI9	Pglyrp1		Innate immunity protein that plays several important functions in antimicrobial and antitumor defense systems.
Tetraspanin	3	1.28932	0.434819	A0A3Q0CRN8	Custom	http://www.uniprot.org/uniprot/A0A3Q0CRN8	Cd151	Membrane
dynactin subunit 1 isoform X5	2	1.31427	0.438459	A0A1U7QPU2	Custom	http://www.uniprot.org/uniprot/A0A1U7QPU2	Dctn1	Cytoplasm
60 kDa chaperonin	2	1.58261	0.439865	A0A1U8C2T0	Custom	http://www.uniprot.org/uniprot/A0A1U8C2T0	LOC106021236
40S ribosomal protein S4	2	0.709766	0.440986	A0A1U7R570	Custom	http://www.uniprot.org/uniprot/A0A1U7R570	Rps4x
ras-related protein Rab-1A	1	0.835735	0.441487	A0A1U7Q629	Custom	http://www.uniprot.org/uniprot/A0A1U7Q629	Rab1a
moesin	42	0.593076	0.442803	A0A1U7QUH9	Custom	http://www.uniprot.org/uniprot/A0A1U7QUH9	Msn	Cell membrane
Proteasome subunit alpha type	3	1.92387	0.443069	A0A3Q0CZY5	Custom	http://www.uniprot.org/uniprot/A0A3Q0CZY5	Psma1	Cytoplasm	Component of the 20S core proteasome complex involved in the proteolytic degradation of most intracellular proteins. This complex plays numerous essential roles within the cell by associating with different regulatory particles. Associated with two 19S regulatory particles, forms the 26S proteasome and thus participates in the ATP-dependent degradation of ubiquitinated proteins. The 26S proteasom…
Succinate--CoA ligase [ADP-forming] subunit beta, mitochondrial	4	2.03554	0.445344	A0A1U7QF78	Custom	http://www.uniprot.org/uniprot/A0A1U7QF78	Sucla2	Mitochondrion	ATP-specific succinyl-CoA synthetase functions in the citric acid cycle (TCA), coupling the hydrolysis of succinyl-CoA to the synthesis of ATP and thus represents the only step of substrate-level phosphorylation in the TCA. The beta subunit provides nucleotide specificity of the enzyme and binds the substrate succinate, while the binding sites for coenzyme A and phosphate are found in the alpha s…
Tubulin alpha chain	11	0.485679	0.448809	A0A1U8CKN9	Custom	http://www.uniprot.org/uniprot/A0A1U8CKN9	LOC101831620	Cytoplasm	Tubulin is the major constituent of microtubules. It binds two moles of GTP, one at an exchangeable site on the beta chain and one at a non-exchangeable site on the alpha chain.
Guanine deaminase	9	2.18305	0.448978	A0A1U7Q4Q9	Custom	http://www.uniprot.org/uniprot/A0A1U7Q4Q9	Gda		Catalyzes the hydrolytic deamination of guanine, producing xanthine and ammonia.
Chitinase	3	8.28095	0.449401	A0A3Q0CQF9	Custom	http://www.uniprot.org/uniprot/A0A3Q0CQF9	Chit1
Prohibitin	2	1.61661	0.450637	A0A1U7Q3L1	Custom	http://www.uniprot.org/uniprot/A0A1U7Q3L1	Phb2	Cell membrane
40S ribosomal protein S6	3	0.940867	0.451492	A0A1U8BXE1	Custom	http://www.uniprot.org/uniprot/A0A1U8BXE1	Rps6
Glycoprotein IIIb	4	1.3161	0.452307	A0A1U8CM00	Custom	http://www.uniprot.org/uniprot/A0A1U8CM00	Cd36	Apical cell membrane
14-3-3 protein epsilon isoform X2	10	0.312032	0.454636	A0A1U8BI50	Custom	http://www.uniprot.org/uniprot/A0A1U8BI50	Ywhae	Cytoplasm
homeobox protein Hox-C6	2	8.3749	0.458771	A0A1U7QJI8	Custom	http://www.uniprot.org/uniprot/A0A1U7QJI8	Hoxc6	Nucleus
Citrate hydro-lyase	2	1.06578	0.459552	A0A1U7QQT0	Custom	http://www.uniprot.org/uniprot/A0A1U7QQT0	Aco1	Cytoplasm	Catalyzes the isomerization of citrate to isocitrate via cis-aconitate.
actin, cytoplasmic 2	5	1.34152	0.46118	A0A1U8BMV0	Custom	http://www.uniprot.org/uniprot/A0A1U8BMV0	Actg1
complement factor H-like	5	9.38618	0.461346	A0A3Q0CX72	Custom	http://www.uniprot.org/uniprot/A0A3Q0CX72	LOC110341505
very long-chain specific acyl-CoA dehydrogenase, mitochondrial	4	7.01996	0.462852	A0A1U7QA30	Custom	http://www.uniprot.org/uniprot/A0A1U7QA30	Acadvl
LIM and calponin homology domains-containing protein 1 isoform X10	2	5.94076	0.468534	A0A1U8C877	Custom	http://www.uniprot.org/uniprot/A0A1U8C877	Limch1
tropomyosin alpha-1 chain isoform X14	9	1.34028	0.471214	A0A1U7QMX2	Custom	http://www.uniprot.org/uniprot/A0A1U7QMX2	Tpm1	Cytoplasm
ras-interacting protein 1	1	1.0213	0.472734	A0A3Q0DEJ5	Custom	http://www.uniprot.org/uniprot/A0A3Q0DEJ5	Rasip1
6-phosphogluconolactonase	3	2.028	0.473193	A0A1U7RCY5	Custom	http://www.uniprot.org/uniprot/A0A1U7RCY5	Pgls		Hydrolysis of 6-phosphogluconolactone to 6-phosphogluconate.
Tripeptidyl-peptidase 2	2	0.524387	0.473836	A0A1U7Q9X0	Custom	http://www.uniprot.org/uniprot/A0A1U7Q9X0	Tpp2
60S ribosomal protein L12	4	5.4909	0.477123	A0A1U7QWV4	Custom	http://www.uniprot.org/uniprot/A0A1U7QWV4	Rpl12		Binds directly to 26S ribosomal RNA.
thrombospondin-1 isoform X2	7	0.692109	0.478421	A0A1U8CQW7	Custom	http://www.uniprot.org/uniprot/A0A1U8CQW7	Thbs1
40S ribosomal protein S18	2	4.58422	0.479511	A0A1U7R3B8	Custom	http://www.uniprot.org/uniprot/A0A1U7R3B8	Rps18		Located at the top of the head of the 40S subunit, it contacts several helices of the 18S rRNA.
Peptidylprolyl isomerase	2	1.30636	0.480041	A0A1U7R9P2	Custom	http://www.uniprot.org/uniprot/A0A1U7R9P2	Fkbp4	Cytoplasm
aldose reductase	8	0.819874	0.481291	A0A1U7R9F1	Custom	http://www.uniprot.org/uniprot/A0A1U7R9F1	Akr1b1
60S ribosomal protein L3	2	1.34946	0.4813	A0A1U8BTJ2	Custom	http://www.uniprot.org/uniprot/A0A1U8BTJ2	Rpl3
Serine/threonine-protein phosphatase	3	1.34201	0.482197	A0A1U7QYU2	Custom	http://www.uniprot.org/uniprot/A0A1U7QYU2	Ppp3ca
endothelial cell-selective adhesion molecule	2	0.233185	0.483691	A0A1U7Q547	Custom	http://www.uniprot.org/uniprot/A0A1U7Q547	Esam
Collectin-12	1	0.247726	0.483804	A0A3Q0DBX8	Custom	http://www.uniprot.org/uniprot/A0A3Q0DBX8	Colec12
Proteasome subunit alpha type	4	0.471228	0.483882	A0A1U7RIX6	Custom	http://www.uniprot.org/uniprot/A0A1U7RIX6	LOC101822549	Cytoplasm	Component of the 20S core proteasome complex involved in the proteolytic degradation of most intracellular proteins. This complex plays numerous essential roles within the cell by associating with different regulatory particles. Associated with two 19S regulatory particles, forms the 26S proteasome and thus participates in the ATP-dependent degradation of ubiquitinated proteins. The 26S proteasom…
alpha-1-antitrypsin isoform X1	10	1.28773	0.483909	A0A1U8BK25	Custom	http://www.uniprot.org/uniprot/A0A1U8BK25	Serpina1
GST class-pi	13	2.02329	0.486192	A0A1U7Q833	Custom	http://www.uniprot.org/uniprot/A0A1U7Q833	Gstp1	Cytoplasm
cardiomyopathy-associated protein 5	2	0.772801	0.48881	A0A3Q0CEN4	Custom	http://www.uniprot.org/uniprot/A0A3Q0CEN4	Cmya5
serum albumin precursor	115	1.19897	0.489391	A0A1U7Q2I1	Custom	http://www.uniprot.org/uniprot/A0A1U7Q2I1	Alb	Secreted
apoptosis-inducing factor 1, mitochondrial isoform X2	2	3.63628	0.489827	A0A1U7QXN0	Custom	http://www.uniprot.org/uniprot/A0A1U7QXN0	Aifm1
Profilin	7	0.850228	0.48997	A0A1U7QJS1	Custom	http://www.uniprot.org/uniprot/A0A1U7QJS1	Pfn1
dynactin subunit 2 isoform X4	2	0.925227	0.494604	A0A3Q0D689	Custom	http://www.uniprot.org/uniprot/A0A3Q0D689	Dctn2
Glucosidase 2 subunit beta	6	1.2649	0.495456	A0A1U8C607	Custom	http://www.uniprot.org/uniprot/A0A1U8C607	Prkcsh
cytoplasmic dynein 1 intermediate chain 2	1	0.32974	0.498922	A0A3Q0D729	Custom	http://www.uniprot.org/uniprot/A0A3Q0D729	Dync1i2
Acyl-coenzyme A oxidase	2	3.25622	0.499984	A0A1U8C1T5	Custom	http://www.uniprot.org/uniprot/A0A1U8C1T5	Acox2	Peroxisome
Vacuolar protein sorting-associated protein 35	2	0.342799	0.501673	A0A1U7R5B8	Custom	http://www.uniprot.org/uniprot/A0A1U7R5B8	Vps35		Plays a role in vesicular protein sorting.
myosin light chain kinase, smooth muscle isoform X3	2	0.330264	0.502174	A0A3Q0CU87	Custom	http://www.uniprot.org/uniprot/A0A3Q0CU87	Mylk
Creatine kinase	12	13.2246	0.502277	A0A1U7R5G9	Custom	http://www.uniprot.org/uniprot/A0A1U7R5G9	Ckm
unconventional myosin-Ic	8	0.916171	0.502478	A0A3Q0CKS1	Custom	http://www.uniprot.org/uniprot/A0A3Q0CKS1	Myo1c
Coronin	6	0.726374	0.508726	A0A1U8CHN2	Custom	http://www.uniprot.org/uniprot/A0A1U8CHN2	Coro1c
heat shock 70 kDa protein 1-like	2	0.292841	0.509142	A0A1U7R665	Custom	http://www.uniprot.org/uniprot/A0A1U7R665	Hspa1l
Dimethylaniline monooxygenase [N-oxide-forming]	1	0.396945	0.510134	A0A1U7QRB7	Custom	http://www.uniprot.org/uniprot/A0A1U7QRB7	Fmo1	Endoplasmic reticulum membrane
ATP-dependent 6-phosphofructokinase	2	1.317	0.510203	A0A3Q0CR43	Custom	http://www.uniprot.org/uniprot/A0A3Q0CR43	Pfkl	Cytoplasm	Catalyzes the phosphorylation of D-fructose 6-phosphate to fructose 1,6-bisphosphate by ATP, the first committing step of glycolysis.
Desmin	7	1.69222	0.510209	Q54A94	Custom	http://www.uniprot.org/uniprot/Q54A94	Des
myosin-9	54	0.632446	0.511072	A0A1U7Q3X8	Custom	http://www.uniprot.org/uniprot/A0A1U7Q3X8	Myh9
60S ribosomal protein L6	4	0.419992	0.511072	A0A3Q0D882	Custom	http://www.uniprot.org/uniprot/A0A3Q0D882	Rpl6		Component of the large ribosomal subunit.
Superoxide dismutase [Cu-Zn]	9	1.37256	0.513051	A0A1U7QH68	Custom	http://www.uniprot.org/uniprot/A0A1U7QH68	Sod1		Destroys radicals which are normally produced within the cells and which are toxic to biological systems.
transcriptional activator protein Pur-beta	2	2.26792	0.514576	A0A1U8CZB0	Custom	http://www.uniprot.org/uniprot/A0A1U8CZB0	Purb	Nucleus
C-1-tetrahydrofolate synthase, cytoplasmic	1	2.28205	0.515084	A0A3Q0CUU0	Custom	http://www.uniprot.org/uniprot/A0A3Q0CUU0	Mthfd1
histone H1.0	2	0.407919	0.516213	A0A1U8BG52	Custom	http://www.uniprot.org/uniprot/A0A1U8BG52	LOC101827473	Nucleus
BTB/POZ domain-containing protein KCTD12	2	1.481	0.517088	A0A1U7QBJ7	Custom	http://www.uniprot.org/uniprot/A0A1U7QBJ7	Kctd12
nascent polypeptide-associated complex subunit alpha	2	0.391522	0.517974	A0A1U8CBH0	Custom	http://www.uniprot.org/uniprot/A0A1U8CBH0	LOC101829818
von Willebrand factor	2	0.954664	0.52343	A0A3Q0DDS2	Custom	http://www.uniprot.org/uniprot/A0A3Q0DDS2	Vwf	Secreted
Arginase	2	2.20882	0.524688	E7CXR7	Custom	http://www.uniprot.org/uniprot/E7CXR7	Arg1
3-hydroxyisobutyrate dehydrogenase	2	1.72599	0.527645	A0A1U7R4T2	Custom	http://www.uniprot.org/uniprot/A0A1U7R4T2	Hibadh
Annexin	17	0.816099	0.528275	A0A1U7Q618	Custom	http://www.uniprot.org/uniprot/A0A1U7Q618	Anxa1	Apical cell membrane
tight junction protein ZO-1 isoform X9	7	0.882033	0.530135	A0A1U8CLF6	Custom	http://www.uniprot.org/uniprot/A0A1U8CLF6	Tjp1	Cell junction
T-cell-specific guanine nucleotide triphosphate-binding protein 1-like	1	0.569222	0.531585	A0A1U8C334	Custom	http://www.uniprot.org/uniprot/A0A1U8C334	LOC101836886
heterogeneous nuclear ribonucleoprotein U-like protein 1 isoform X2	2	0.233839	0.533656	A0A1U8CNN7	Custom	http://www.uniprot.org/uniprot/A0A1U8CNN7	Hnrnpul1
Serine protease	1	1.84385	0.536549	A9XDF3	Custom	http://www.uniprot.org/uniprot/A9XDF3	HtrA1
Annexin	18	0.858579	0.536875	A0A1U7Q8Y5	Custom	http://www.uniprot.org/uniprot/A0A1U7Q8Y5	Anxa3
guanine nucleotide-binding protein G(I) subunit alpha-1	1	1.41528	0.537507	A0A1U7R767	Custom	http://www.uniprot.org/uniprot/A0A1U7R767	Gnai1
myoferlin isoform X5	4	0.637623	0.53828	A0A3Q0CI93	Custom	http://www.uniprot.org/uniprot/A0A3Q0CI93	Myof	Cytoplasmic vesicle membrane
collagen alpha-1(I) chain isoform X2	7	3.16822	0.541004	A0A1U8C400	Custom	http://www.uniprot.org/uniprot/A0A1U8C400	Col1a1
collagen alpha-1(XIV) chain	2	2.58607	0.542805	A0A3Q0DBF0	Custom	http://www.uniprot.org/uniprot/A0A3Q0DBF0	Col14a1
Palmitoyltransferase	1	3.70962	0.544843	A0A1U8CPH6	Custom	http://www.uniprot.org/uniprot/A0A1U8CPH6	Zdhhc5	Membrane
Chloride intracellular channel protein	3	1.16381	0.546434	A0A1U7QIG5	Custom	http://www.uniprot.org/uniprot/A0A1U7QIG5	Clic4	Cell membrane
Actin-related protein 2/3 complex subunit	2	0.859398	0.547195	A0A1U7R2Z3	Custom	http://www.uniprot.org/uniprot/A0A1U7R2Z3	Arpc1b	Cytoplasm	Functions as component of the Arp2/3 complex which is involved in regulation of actin polymerization and together with an activating nucleation-promoting factor (NPF) mediates the formation of branched actin networks.
Flotillin	2	1.78323	0.549126	A0A1U7QX06	Custom	http://www.uniprot.org/uniprot/A0A1U7QX06	Flot1	Endosome
laminin subunit alpha-3	2	1.13336	0.550695	A0A3Q0D8P8	Custom	http://www.uniprot.org/uniprot/A0A3Q0D8P8	Lama3	Membrane
keratin, type I cytoskeletal 18	4	0.822764	0.551656	A0A1U7QJF8	Custom	http://www.uniprot.org/uniprot/A0A1U7QJF8	Krt18
serotransferrin	86	1.39593	0.552625	A0A1U8BSW4	Custom	http://www.uniprot.org/uniprot/A0A1U8BSW4	LOC101828182
Proteasome subunit beta	2	0.987409	0.554028	A0A1U7RCL6	Custom	http://www.uniprot.org/uniprot/A0A1U7RCL6	Psmb4	Cytoplasm	Non-catalytic component of the proteasome.
histone H1.2	12	1.12243	0.55483	A0A1U7Q3S0	Custom	http://www.uniprot.org/uniprot/A0A1U7Q3S0	LOC101826763	Nucleus
Dolichyl-diphosphooligosaccharide--protein glycosyltransferase subunit 1	7	2.30813	0.55539	A0A1U7QR04	Custom	http://www.uniprot.org/uniprot/A0A1U7QR04	Rpn1	Endoplasmic reticulum membrane	Subunit of the oligosaccharyl transferase (OST) complex that catalyzes the initial transfer of a defined glycan (Glc(3)Man(9)GlcNAc(2) in eukaryotes) from the lipid carrier dolichol-pyrophosphate to an asparagine residue within an Asn-X-Ser/Thr consensus motif in nascent polypeptide chains, the first step in protein N-glycosylation. N-glycosylation occurs cotranslationally and the complex associa…
Butyryl-CoA dehydrogenase	2	0.952348	0.556588	A0A3Q0D152	Custom	http://www.uniprot.org/uniprot/A0A3Q0D152	Ivd
basement membrane-specific heparan sulfate proteoglycan core protein	43	0.61641	0.55908	A0A3Q0D8D0	Custom	http://www.uniprot.org/uniprot/A0A3Q0D8D0	Hspg2	Membrane
eukaryotic translation initiation factor 4B	3	1.34058	0.564133	A0A3Q0CFL5	Custom	http://www.uniprot.org/uniprot/A0A3Q0CFL5	Eif4b
collagen alpha-1(I) chain isoform X1	6	3.31963	0.564619	A0A1U7QKK9	Custom	http://www.uniprot.org/uniprot/A0A1U7QKK9	Col1a1
Electron transfer flavoprotein subunit alpha	5	2.38764	0.565287	A0A3Q0CIQ8	Custom	http://www.uniprot.org/uniprot/A0A3Q0CIQ8	Etfa	Mitochondrion matrix	The electron transfer flavoprotein serves as a specific electron acceptor for several dehydrogenases, including five acyl-CoA dehydrogenases, glutaryl-CoA and sarcosine dehydrogenase. It transfers the electrons to the main mitochondrial respiratory chain via ETF-ubiquinone oxidoreductase (ETF dehydrogenase).
Elongation factor 1-alpha	3	1.40004	0.568444	A0A1U8C8L7	Custom	http://www.uniprot.org/uniprot/A0A1U8C8L7	Eef1a2		This protein promotes the GTP-dependent binding of aminoacyl-tRNA to the A-site of ribosomes during protein biosynthesis.
band 4.1-like protein 2 isoform X12	2	0.904963	0.570509	A0A3Q0CG78	Custom	http://www.uniprot.org/uniprot/A0A3Q0CG78	Epb41l2
laminin subunit alpha-5	15	0.794863	0.572741	A0A1U7QLD6	Custom	http://www.uniprot.org/uniprot/A0A1U7QLD6	Lama5	Membrane
Histone H2B	7	0.288799	0.574059	A0A1U7Q7A0	Custom	http://www.uniprot.org/uniprot/A0A1U7Q7A0	LOC101827298	Nucleus
fibrillin-1 isoform X2	3	0.933901	0.577766	A0A1U8BW98	Custom	http://www.uniprot.org/uniprot/A0A1U8BW98	Fbn1	Secreted
Collagen type VI alpha 2 subunit	20	1.09982	0.57847	D0G6X2	Custom	http://www.uniprot.org/uniprot/D0G6X2	COL6A2
IDP (Fragment)	14	0.697376	0.583601	Q0QER7	Custom	http://www.uniprot.org/uniprot/Q0QER7	IDH1
Hexokinase	3	0.412898	0.584078	A0A3Q0CRR0	Custom	http://www.uniprot.org/uniprot/A0A3Q0CRR0	Hk1
inter-alpha-trypsin inhibitor heavy chain H2 precursor	6	0.901305	0.587553	A0A1U7Q2C1	Custom	http://www.uniprot.org/uniprot/A0A1U7Q2C1	Itih2	Secreted
breast carcinoma-amplified sequence 1	3	2.94698	0.589039	A0A3Q0CXJ1	Custom	http://www.uniprot.org/uniprot/A0A3Q0CXJ1	Bcas1
Plasminogen	22	1.52515	0.591406	A0A3Q0CDV3	Custom	http://www.uniprot.org/uniprot/A0A3Q0CDV3	Plg	Secreted	Plasmin dissolves the fibrin of blood clots and acts as a proteolytic factor in a variety of other processes including embryonic development, tissue remodeling, tumor invasion, and inflammation. In ovulation, weakens the walls of the Graafian follicle. It activates the urokinase-type plasminogen activator, collagenases and several complement zymogens, such as C1 and C5. Cleavage of fibronectin an…
Histone H2A	4	2.08283	0.59316	A0A1U7Q479	Custom	http://www.uniprot.org/uniprot/A0A1U7Q479	LOC101828968	Chromosome
serum deprivation-response protein	7	1.05248	0.595638	A0A1U7QX40	Custom	http://www.uniprot.org/uniprot/A0A1U7QX40	Cavin2	Membrane
40S ribosomal protein S14	2	0.681056	0.597584	A0A3Q0CYZ2	Custom	http://www.uniprot.org/uniprot/A0A3Q0CYZ2	Rps14
LIM and senescent cell antigen-like-containing domain protein	2	1.74165	0.598511	A0A1U8BPX1	Custom	http://www.uniprot.org/uniprot/A0A1U8BPX1	Lims1	Cell junction	Adapter protein in a cytoplasmic complex linking beta-integrins to the actin cytoskeleton, bridges the complex to cell surface receptor tyrosine kinases and growth factor receptors.
periostin isoform X2	3	2.66721	0.599619	A0A1U7QYR1	Custom	http://www.uniprot.org/uniprot/A0A1U7QYR1	Postn	Secreted
prostaglandin-E(2) 9-reductase-like isoform X2	5	0.997525	0.607349	A0A1U7QPC1	Custom	http://www.uniprot.org/uniprot/A0A1U7QPC1	LOC101841267
inaD-like protein	2	0.343235	0.611535	A0A1U7QKV9	Custom	http://www.uniprot.org/uniprot/A0A1U7QKV9	Patj	Cell junction
Microtubule-associated protein	3	1.09783	0.612167	A0A1U8C9I0	Custom	http://www.uniprot.org/uniprot/A0A1U8C9I0	Map4	Cytoplasm
Eukaryotic translation elongation factor 1 alpha (Fragment)	3	1.12499	0.614478	E2GMU8	Custom	http://www.uniprot.org/uniprot/E2GMU8
AP-2 complex subunit alpha	3	0.642986	0.616699	A0A1U7Q6J0	Custom	http://www.uniprot.org/uniprot/A0A1U7Q6J0	Ap2a2	Membrane	Component of the adaptor protein complex 2 (AP-2). Adaptor protein complexes function in protein transport via transport vesicles in different membrane traffic pathways. Adaptor protein complexes are vesicle coat components and appear to be involved in cargo selection and vesicle formation. AP-2 is involved in clathrin-dependent endocytosis in which cargo proteins are incorporated into vesicles s…
Anion exchange protein	7	0.619702	0.619975	A0A1U7QDP3	Custom	http://www.uniprot.org/uniprot/A0A1U7QDP3	Slc4a1	Cell membrane	Functions both as a transporter that mediates electroneutral anion exchange across the cell membrane and as a structural protein. Major integral membrane glycoprotein of the erythrocyte membrane; required for normal flexibility and stability of the erythrocyte membrane and for normal erythrocyte shape via the interactions of its cytoplasmic domain with cytoskeletal proteins, glycolytic enzymes, a…
Calpain inhibitor	4	2.61578	0.623684	A0A3Q0CFQ5	Custom	http://www.uniprot.org/uniprot/A0A3Q0CFQ5	Cast		Specific inhibition of calpain (calcium-dependent cysteine protease). Plays a key role in postmortem tenderization of meat and have been proposed to be involved in muscle protein degradation in living tissue.
Aconitate hydratase, mitochondrial	20	1.5624	0.625586	A0A1U8BGS0	Custom	http://www.uniprot.org/uniprot/A0A1U8BGS0	Aco2	Mitochondrion	Catalyzes the isomerization of citrate to isocitrate via cis-aconitate.
serine protease inhibitor A3N-like isoform X1	7	0.69953	0.631	A0A1U8BVP4	Custom	http://www.uniprot.org/uniprot/A0A1U8BVP4	LOC101835835
LIM domain only protein 7 isoform X3	9	0.820576	0.634491	A0A3Q0CS98	Custom	http://www.uniprot.org/uniprot/A0A3Q0CS98	Lmo7
guanine nucleotide-binding protein G(I)/G(S)/G(T) subunit beta-1	3	1.12942	0.636645	A0A3Q0D1E3	Custom	http://www.uniprot.org/uniprot/A0A3Q0D1E3	Gnb1
serine/threonine-protein phosphatase 2A 65 kDa regulatory subunit A alpha isoform	4	1.07949	0.642505	A0A1U7R3I2	Custom	http://www.uniprot.org/uniprot/A0A1U7R3I2	Ppp2r1a
Transaldolase	10	0.927002	0.646074	A0A3Q0CLE6	Custom	http://www.uniprot.org/uniprot/A0A3Q0CLE6	Taldo1		Transaldolase is important for the balance of metabolites in the pentose-phosphate pathway.
60S ribosomal protein L23	2	0.772231	0.650711	A0A1U7QW59	Custom	http://www.uniprot.org/uniprot/A0A1U7QW59	Rpl23
Collagen type VI alpha 1 subunit	27	0.777378	0.651657	D0G6X1	Custom	http://www.uniprot.org/uniprot/D0G6X1	COL6A1
L-xylulose reductase isoform X1	2	0.220648	0.652071	A0A1U8BMH8	Custom	http://www.uniprot.org/uniprot/A0A1U8BMH8	Dcxr
plectin isoform X2	3	11.949	0.659483	A0A3Q0CCT3	Custom	http://www.uniprot.org/uniprot/A0A3Q0CCT3	LOC101836251	Cytoplasm
Transthyretin	9	1.11353	0.661122	A0A1U7Q643	Custom	http://www.uniprot.org/uniprot/A0A1U7Q643	Ttr	Secreted	Thyroid hormone-binding protein.
Histone H4	7	0.706378	0.661169	A0A1U7QTV0	Custom	http://www.uniprot.org/uniprot/A0A1U7QTV0	LOC101825928	Chromosome	Core component of nucleosome. Nucleosomes wrap and compact DNA into chromatin, limiting DNA accessibility to the cellular machineries which require DNA as a template. Histones thereby play a central role in transcription regulation, DNA repair, DNA replication and chromosomal stability. DNA accessibility is regulated via a complex set of post-translational modifications of histones, also called h…
Glyoxalase domain-containing protein 4	5	1.66276	0.662334	A0A1U7Q435	Custom	http://www.uniprot.org/uniprot/A0A1U7Q435	Glod4
F-actin-capping protein subunit alpha	3	1.04126	0.666357	A0A1U7QD74	Custom	http://www.uniprot.org/uniprot/A0A1U7QD74	Capza1		F-actin-capping proteins bind in a Ca(2+)-independent manner to the fast growing ends of actin filaments (barbed end) thereby blocking the exchange of subunits at these ends. Unlike other capping proteins (such as gelsolin and severin), these proteins do not sever actin filaments.
enoyl-CoA hydratase, mitochondrial	4	1.27192	0.669977	A0A1U7QE79	Custom	http://www.uniprot.org/uniprot/A0A1U7QE79	Echs1
fragile X mental retardation syndrome-related protein 2	2	0.184314	0.677186	A0A1U7QA41	Custom	http://www.uniprot.org/uniprot/A0A1U7QA41	Fxr2
collagen alpha-2(I) chain	11	4.33624	0.677317	A0A1U7R801	Custom	http://www.uniprot.org/uniprot/A0A1U7R801	Col1a2
ras-related protein Rab-7a	4	1.23927	0.67996	A0A1U7R965	Custom	http://www.uniprot.org/uniprot/A0A1U7R965	LOC101839102
ras-related protein Rap-1b	6	0.7006	0.683566	A0A1U7R5R8	Custom	http://www.uniprot.org/uniprot/A0A1U7R5R8	Rap1b
Annexin	24	0.884636	0.685207	A0A1U7QJZ2	Custom	http://www.uniprot.org/uniprot/A0A1U7QJZ2	Anxa2	Membrane
Chloride intracellular channel protein	6	0.515624	0.694767	A0A1U8CRR4	Custom	http://www.uniprot.org/uniprot/A0A1U8CRR4	Clic1	Cell membrane
2-phospho-D-glycerate hydro-lyase	4	1.2286	0.697657	A0A1U7QHC6	Custom	http://www.uniprot.org/uniprot/A0A1U7QHC6	Eno3
solute carrier family 26 member 10	2	1.37203	0.703333	A0A1U7R5K1	Custom	http://www.uniprot.org/uniprot/A0A1U7R5K1	Slc26a10	Membrane
T-complex protein 1 subunit delta	4	1.063	0.703443	A0A1U7Q620	Custom	http://www.uniprot.org/uniprot/A0A1U7Q620	Cct4	Cytoplasm
phosphoglucomutase-1 isoform X2	12	0.989204	0.708277	A0A1U7QA35	Custom	http://www.uniprot.org/uniprot/A0A1U7QA35	Pgm1
60S ribosomal protein L34	5	1.06123	0.711891	A0A1U7RA38	Custom	http://www.uniprot.org/uniprot/A0A1U7RA38	Rpl34
Hypoxanthine phosphoribosyltransferase	3	0.952129	0.716555	A0A1U7QTB7	Custom	http://www.uniprot.org/uniprot/A0A1U7QTB7	Hprt1	Cytoplasm	Converts guanine to guanosine monophosphate, and hypoxanthine to inosine monophosphate. Transfers the 5-phosphoribosyl group from 5-phosphoribosylpyrophosphate onto the purine. Plays a central role in the generation of purine nucleotides through the purine salvage pathway.
ES1 protein homolog, mitochondrial	4	1.72118	0.716804	A0A3Q0CSY2	Custom	http://www.uniprot.org/uniprot/A0A3Q0CSY2	CUNH21orf33
Acyl-peptide hydrolase	10	0.851057	0.725682	A0A1U7QAU3	Custom	http://www.uniprot.org/uniprot/A0A1U7QAU3	Apeh
peroxiredoxin-6	14	1.32828	0.738792	A0A1U7Q712	Custom	http://www.uniprot.org/uniprot/A0A1U7Q712	Prdx6	Cytoplasm	Thiol-specific peroxidase that catalyzes the reduction of hydrogen peroxide and organic hydroperoxides to water and alcohols, respectively.
calreticulin	9	0.884628	0.755632	A0A1U8CQ22	Custom	http://www.uniprot.org/uniprot/A0A1U8CQ22	Calr
Rab GDP dissociation inhibitor	6	1.60039	0.759087	A0A1U7R6A7	Custom	http://www.uniprot.org/uniprot/A0A1U7R6A7	Gdi1	Cytoplasm	Regulates the GDP/GTP exchange reaction of most RAB proteins by inhibiting the dissociation of GDP from them, and the subsequent binding of GTP.
complement C5-like	4	3.06769	0.761069	A0A1U8D3A6	Custom	http://www.uniprot.org/uniprot/A0A1U8D3A6	LOC106022763
basement membrane-specific heparan sulfate proteoglycan core protein-like	5	0.765401	0.765827	A0A1U7RGT0	Custom	http://www.uniprot.org/uniprot/A0A1U7RGT0	LOC101823263
dihydropyrimidinase-related protein 3	4	0.927342	0.768863	A0A3Q0CQL3	Custom	http://www.uniprot.org/uniprot/A0A3Q0CQL3	Dpysl3	Cell projection
ankyrin repeat domain-containing protein 30A isoform X5	2	1.34525	0.772863	A0A1U8BEI7	Custom	http://www.uniprot.org/uniprot/A0A1U8BEI7	Ankrd30a
Pyruvate carboxylase	1	0.952553	0.77751	A0A1U8BPF1	Custom	http://www.uniprot.org/uniprot/A0A1U8BPF1	Pc		Catalyzes a 2-step reaction, involving the ATP-dependent carboxylation of the covalently attached biotin in the first step and the transfer of the carboxyl group to pyruvate in the second.
Tubulin alpha chain	8	0.617691	0.781427	A0A1U7Q653	Custom	http://www.uniprot.org/uniprot/A0A1U7Q653	Tuba4a	Cytoplasm	Tubulin is the major constituent of microtubules. It binds two moles of GTP, one at an exchangeable site on the beta chain and one at a non-exchangeable site on the alpha chain.
14-3-3 protein gamma	6	0.954492	0.787536	A0A1U7R3S5	Custom	http://www.uniprot.org/uniprot/A0A1U7R3S5	Ywhag	Cytoplasm
laminin subunit beta-2 isoform X3	30	0.911569	0.789122	A0A1U8BYW4	Custom	http://www.uniprot.org/uniprot/A0A1U8BYW4	Lamb2	Membrane
Protein disulfide-isomerase	13	0.894987	0.79091	A0A3Q0CPL0	Custom	http://www.uniprot.org/uniprot/A0A3Q0CPL0	Pdia3	Endoplasmic reticulum
ezrin	7	0.680151	0.807799	A0A3Q0CIH4	Custom	http://www.uniprot.org/uniprot/A0A3Q0CIH4	Ezr	Cell membrane
Carbonic anhydrase	14	0.838534	0.808945	A0A1U7QIM1	Custom	http://www.uniprot.org/uniprot/A0A1U7QIM1	Ca1	Cytoplasm	Reversible hydration of carbon dioxide.
basal cell adhesion molecule	14	1.0535	0.810603	A0A1U8CNB5	Custom	http://www.uniprot.org/uniprot/A0A1U8CNB5	Bcam
Malate dehydrogenase	11	0.996746	0.8109	A0A1U7Q626	Custom	http://www.uniprot.org/uniprot/A0A1U7Q626	Mdh1
40S ribosomal protein S25	3	0.432638	0.817807	A0A1U7QCJ6	Custom	http://www.uniprot.org/uniprot/A0A1U7QCJ6	Rps25
cytoplasmic dynein 1 heavy chain 1	12	0.637782	0.818189	A0A3Q0CM76	Custom	http://www.uniprot.org/uniprot/A0A3Q0CM76	Dync1h1
Agrin	7	0.756033	0.820768	A0A1U8C7M5	Custom	http://www.uniprot.org/uniprot/A0A1U8C7M5	Agrn
KN motif and ankyrin repeat domain-containing protein 3 isoform X3	4	0.934369	0.827147	A0A1U8CBY1	Custom	http://www.uniprot.org/uniprot/A0A1U8CBY1	Kank3
ras-related C3 botulinum toxin substrate 1 isoform X2	6	0.977088	0.844186	A0A1U7QVJ3	Custom	http://www.uniprot.org/uniprot/A0A1U7QVJ3	Rac1
Apolipoprotein H	6	1.80638	0.84719	A0A1U7QB41	Custom	http://www.uniprot.org/uniprot/A0A1U7QB41	Apoh	Secreted	Binds to various kinds of negatively charged substances such as heparin, phospholipids, and dextran sulfate. May prevent activation of the intrinsic blood coagulation cascade by binding to phospholipids on the surface of damaged cells.
Cadherin-13	2	0.0602278	0.848373	A0A3Q0CVH1	Custom	http://www.uniprot.org/uniprot/A0A3Q0CVH1	Cdh13	Cell membrane
Septin	1	0.235904	0.852448	A0A1U7QKR5	Custom	http://www.uniprot.org/uniprot/A0A1U7QKR5	44450		Filament-forming cytoskeletal GTPase.
heat shock cognate 71 kDa protein	27	0.997834	0.857084	A0A1U8BQW6	Custom	http://www.uniprot.org/uniprot/A0A1U8BQW6	Hspa8
Serine/threonine-protein phosphatase	2	4.8476	0.857685	A0A1U7Q2V8	Custom	http://www.uniprot.org/uniprot/A0A1U7Q2V8	Ppp1ca	Nucleus
Collagen type VI alpha 3 subunit	71	0.838961	0.858447	D0G7D9	Custom	http://www.uniprot.org/uniprot/D0G7D9	COL6A3
Electron transfer flavoprotein subunit beta	7	5.94599	0.862753	A0A1U7QS16	Custom	http://www.uniprot.org/uniprot/A0A1U7QS16	Etfb	Mitochondrion matrix	The electron transfer flavoprotein serves as a specific electron acceptor for several dehydrogenases, including five acyl-CoA dehydrogenases, glutaryl-CoA and sarcosine dehydrogenase. It transfers the electrons to the main mitochondrial respiratory chain via ETF-ubiquinone oxidoreductase (ETF dehydrogenase).
Integrin beta	9	0.897405	0.868728	A0A3Q0DCP7	Custom	http://www.uniprot.org/uniprot/A0A3Q0DCP7	Itgb1	Cell junction
GTP-binding nuclear protein Ran	3	1.16928	0.869097	A0A1U8D1I2	Custom	http://www.uniprot.org/uniprot/A0A1U8D1I2	LOC101829765	Nucleus	GTP-binding protein involved in nucleocytoplasmic transport. Required for the import of protein into the nucleus and also for RNA export. Involved in chromatin condensation and control of cell cycle.
Beta-globin (Fragment)	24	1.41718	0.871857	K7WL83	Custom	http://www.uniprot.org/uniprot/K7WL83
septin-9 isoform X5	2	1.44167	0.871994	A0A1U8BNC4	Custom	http://www.uniprot.org/uniprot/A0A1U8BNC4	44448
actin, aortic smooth muscle	6	0.748256	0.872572	A0A1U7Q4N7	Custom	http://www.uniprot.org/uniprot/A0A1U7Q4N7	Acta2
60 kDa chaperonin	9	1.04292	0.873691	A0A3Q0D978	Custom	http://www.uniprot.org/uniprot/A0A3Q0D978	Hspd1
Polypyrimidine tract-binding protein 1	2	1.1581	0.875156	A0A1U7R8K7	Custom	http://www.uniprot.org/uniprot/A0A1U7R8K7	Ptbp1	Nucleus
NADH-ubiquinone oxidoreductase 75 kDa subunit, mitochondrial	5	1.01986	0.875239	A0A1U7QPW6	Custom	http://www.uniprot.org/uniprot/A0A1U7QPW6	Ndufs1	Mitochondrion inner membrane
synemin isoform X2	4	4.69856	0.878199	A0A1U7R1X8	Custom	http://www.uniprot.org/uniprot/A0A1U7R1X8	Synm
plasminogen activator inhibitor 1 RNA-binding protein	2	1.01905	0.893175	A0A1U7QKY4	Custom	http://www.uniprot.org/uniprot/A0A1U7QKY4	Serbp1	Cytoplasm
ras GTPase-activating-like protein IQGAP1	11	0.857431	0.896271	A0A1U7QNY2	Custom	http://www.uniprot.org/uniprot/A0A1U7QNY2	Iqgap1
plasmalemma vesicle-associated protein	6	1.02563	0.898627	A0A1U8CU45	Custom	http://www.uniprot.org/uniprot/A0A1U8CU45	Plvap
tropomyosin alpha-4 chain isoform X2	22	0.948004	0.899552	A0A3Q0CFI9	Custom	http://www.uniprot.org/uniprot/A0A3Q0CFI9	Tpm4	Cytoplasm
Proteasome subunit alpha type	2	9.01182	0.899866	A0A1U7QLW1	Custom	http://www.uniprot.org/uniprot/A0A1U7QLW1	Psma5	Cytoplasm
collagen alpha-1(XXII) chain	2	3.20993	0.901458	A0A3Q0D9A1	Custom	http://www.uniprot.org/uniprot/A0A3Q0D9A1	Col22a1
calnexin isoform X1	2	0.303452	0.9025	A0A1U8C3K2	Custom	http://www.uniprot.org/uniprot/A0A1U8C3K2	Canx
A-kinase anchor protein 2 isoform X6	11	1.06572	0.902832	A0A1U8CKB4	Custom	http://www.uniprot.org/uniprot/A0A1U8CKB4	Akap2
Fructose-bisphosphate aldolase	26	0.990375	0.909237	A0A1U7QC12	Custom	http://www.uniprot.org/uniprot/A0A1U7QC12	Aldoa
Isocitrate dehydrogenase [NADP]	5	0.768135	0.909869	A0A1U7QNX2	Custom	http://www.uniprot.org/uniprot/A0A1U7QNX2	Idh2
14-3-3 protein eta	4	2.39922	0.910779	A0A1U7R6Z8	Custom	http://www.uniprot.org/uniprot/A0A1U7R6Z8	Ywhah	Cytoplasm
ATP synthase subunit gamma	3	0.383846	0.915808	A0A1U8C2X1	Custom	http://www.uniprot.org/uniprot/A0A1U8C2X1	Atp5c1		Mitochondrial membrane ATP synthase (F(1)F(0) ATP synthase or Complex V) produces ATP from ADP in the presence of a proton gradient across the membrane which is generated by electron transport complexes of the respiratory chain. F-type ATPases consist of two structural domains, F(1) - containing the extramembraneous catalytic core, and F(0) - containing the membrane proton channel, linked togethe…
Cofilin, non-muscle isoform	7	0.728341	0.916467	A0A1U7QYH2	Custom	http://www.uniprot.org/uniprot/A0A1U7QYH2	Cfl1	Cell projection
ras-related protein Rab-11A	2	1.11777	0.918161	A0A1U7QY95	Custom	http://www.uniprot.org/uniprot/A0A1U7QY95	Rab11a
Beta-actin (Fragment)	2	0.106534	0.924348	Q0QWA2	Custom	http://www.uniprot.org/uniprot/Q0QWA2
ras-related protein Rab-5C	2	1.14244	0.927755	A0A1U7R754	Custom	http://www.uniprot.org/uniprot/A0A1U7R754	Rab5c
laminin subunit beta-3 isoform X2	6	0.370695	0.929406	A0A1U8CQP3	Custom	http://www.uniprot.org/uniprot/A0A1U8CQP3	Lamb3
S-adenosylmethionine synthase	2	0.448249	0.932656	A0A1U7QL04	Custom	http://www.uniprot.org/uniprot/A0A1U7QL04	Mat2a		Catalyzes the formation of S-adenosylmethionine from methionine and ATP.
transketolase	15	1.01134	0.934092	A0A1U7RDZ8	Custom	http://www.uniprot.org/uniprot/A0A1U7RDZ8	Tkt
Caveolin	7	0.474817	0.935466	A0A1U7R4Q2	Custom	http://www.uniprot.org/uniprot/A0A1U7R4Q2	Cav1	Cell membrane	May act as a scaffolding protein within caveolar membranes. Interacts directly with G-protein alpha subunits and can functionally regulate their activity.
tumor protein D52 isoform X5	2	1.79051	0.936282	A0A1U8BGR7	Custom	http://www.uniprot.org/uniprot/A0A1U8BGR7	Tpd52
Glutathione S-transferase	2	1.13662	0.937115	P70686	Custom	http://www.uniprot.org/uniprot/P70686	GSTYc	Cytoplasm
Ribosomal protein L15	2	0.756925	0.938124	A0A1U8BZY7	Custom	http://www.uniprot.org/uniprot/A0A1U8BZY7	LOC101838491
Tubulin beta chain	3	0.785865	0.939351	A0A1U7R1I6	Custom	http://www.uniprot.org/uniprot/A0A1U7R1I6	Tubb4b	Cytoplasm	Tubulin is the major constituent of microtubules. It binds two moles of GTP, one at an exchangeable site on the beta chain and one at a non-exchangeable site on the alpha chain.
5-aminoimidazole-4-carboxamide ribonucleotide formyltransferase	7	0.74032	0.939691	A0A1U7Q676	Custom	http://www.uniprot.org/uniprot/A0A1U7Q676	Atic
60S ribosomal protein L36a	3	0.852855	0.940815	A0A1U7QF08	Custom	http://www.uniprot.org/uniprot/A0A1U7QF08	LOC101840367
LIM and cysteine-rich domains protein 1	3	0.508834	0.940916	A0A1U7Q3M9	Custom	http://www.uniprot.org/uniprot/A0A1U7Q3M9	Lmcd1
Dihydrolipoyl dehydrogenase	6	1.18324	0.946861	A0A1U7QP50	Custom	http://www.uniprot.org/uniprot/A0A1U7QP50	Dld	Cell projection
collagen alpha-1(IV) chain	9	1.35158	0.94856	A0A3Q0CXU9	Custom	http://www.uniprot.org/uniprot/A0A3Q0CXU9	Col4a1	Membrane	Type IV collagen is the major structural component of glomerular basement membranes (GBM), forming a 'chicken-wire' meshwork together with laminins, proteoglycans and entactin/nidogen.
Splicing factor 1	1	0.856437	0.949819	A0A1U7QBB0	Custom	http://www.uniprot.org/uniprot/A0A1U7QBB0	Sf1	Nucleus	Necessary for the splicing of pre-mRNA. Has a role in the recognition of the branch site (5'-UACUAAC-3'), the pyrimidine tract and the 3'-splice site at the 3'-end of introns.
Protein disulfide-isomerase A4	3	0.723126	0.951059	A0A1U7RH50	Custom	http://www.uniprot.org/uniprot/A0A1U7RH50	Pdia4	Endoplasmic reticulum lumen
Oxoglutarate dehydrogenase (succinyl-transferring)	9	1.0106	0.953285	A0A1U7RGH4	Custom	http://www.uniprot.org/uniprot/A0A1U7RGH4	Ogdh
retinal dehydrogenase 2	2	0.358853	0.95349	A0A1U7QVC8	Custom	http://www.uniprot.org/uniprot/A0A1U7QVC8	Aldh1a2
NADPH--cytochrome P450 reductase	2	0.501585	0.955127	A0A1U7R3R8	Custom	http://www.uniprot.org/uniprot/A0A1U7R3R8	LOC101843888	Endoplasmic reticulum membrane	This enzyme is required for electron transfer from NADP to cytochrome P450.
centrosome-associated protein CEP250	1	0.308941	0.955429	A0A3Q0DE32	Custom	http://www.uniprot.org/uniprot/A0A3Q0DE32	Cep250
chondroitin sulfate proteoglycan 4	1	0.337818	0.957137	A0A1U7Q5B4	Custom	http://www.uniprot.org/uniprot/A0A1U7Q5B4	Cspg4
Sodium/potassium-transporting ATPase subunit alpha	1	1.48768	0.958211	A0A3Q0D8W6	Custom	http://www.uniprot.org/uniprot/A0A3Q0D8W6	Atp4a	Cell membrane	Catalyzes the hydrolysis of ATP coupled with the exchange of H(+) and K(+) ions across the plasma membrane. Responsible for acid production in the stomach.
hsc70-interacting protein	2	0.38924	0.958546	A0A3Q0CJY5	Custom	http://www.uniprot.org/uniprot/A0A3Q0CJY5	St13
regulator of G-protein signaling 9-binding protein	3	0.377132	0.959564	A0A1U8CP57	Custom	http://www.uniprot.org/uniprot/A0A1U8CP57	LOC101824292
PDZ domain-containing protein 2 isoform X5	2	0.567757	0.959956	A0A1U8C7X2	Custom	http://www.uniprot.org/uniprot/A0A1U8C7X2	Pdzd2
Proteasome subunit beta	3	0.411519	0.961768	A0A1U7R248	Custom	http://www.uniprot.org/uniprot/A0A1U7R248	Psmb2	Cytoplasm	Component of the proteasome, a multicatalytic proteinase complex which is characterized by its ability to cleave peptides with Arg, Phe, Tyr, Leu, and Glu adjacent to the leaving group at neutral or slightly basic pH. The proteasome has an ATP-dependent proteolytic activity.
Spectrin beta chain	5	1.09627	0.966149	A0A1U7QBK2	Custom	http://www.uniprot.org/uniprot/A0A1U7QBK2	Sptbn1
actin, alpha skeletal muscle	2	2.24529	0.968636	A0A1U7QEW4	Custom	http://www.uniprot.org/uniprot/A0A1U7QEW4	Acta1
periaxin	18	1.22059	0.969229	A0A1U7QV17	Custom	http://www.uniprot.org/uniprot/A0A1U7QV17	Prx
thimet oligopeptidase	3	1.80123	0.972115	A0A1U7QXU2	Custom	http://www.uniprot.org/uniprot/A0A1U7QXU2	Thop1
GTP-binding nuclear protein Ran	1	0.522338	0.973812	A0A1U7QIW2	Custom	http://www.uniprot.org/uniprot/A0A1U7QIW2	LOC101837891	Nucleus	GTP-binding protein involved in nucleocytoplasmic transport. Required for the import of protein into the nucleus and also for RNA export. Involved in chromatin condensation and control of cell cycle.
pulmonary surfactant-associated protein D isoform X3	4	1.01852	0.973958	A0A1U8CAZ6	Custom	http://www.uniprot.org/uniprot/A0A1U8CAZ6	Sftpd
Adenosine aminohydrolase	4	0.808258	0.977149	A0A3Q0DEW2	Custom	http://www.uniprot.org/uniprot/A0A3Q0DEW2	Ada	Cell junction
complement component receptor 1-like protein	5	0.854108	0.980409	A0A3Q0DAS2	Custom	http://www.uniprot.org/uniprot/A0A3Q0DAS2	Cr1l
voltage-dependent calcium channel subunit alpha-2/delta-1	5	0.658361	0.981733	A0A3Q0D849	Custom	http://www.uniprot.org/uniprot/A0A3Q0D849	Cacna2d1
catenin delta-1 isoform X17	1	1.39968	0.982878	A0A3Q0D3Q6	Custom	http://www.uniprot.org/uniprot/A0A3Q0D3Q6	Ctnnd1
Histone H2A	2	1.2545	0.98871	A0A1U7QIH1	Custom	http://www.uniprot.org/uniprot/A0A1U7QIH1	LOC101826184	Chromosome
Actin-related protein 2/3 complex subunit 3	1	1.24049	0.988883	A0A3Q0D826	Custom	http://www.uniprot.org/uniprot/A0A3Q0D826	Arpc3	Cytoplasm	Functions as component of the Arp2/3 complex which is involved in regulation of actin polymerization and together with an activating nucleation-promoting factor (NPF) mediates the formation of branched actin networks.
collagen alpha-5(IV) chain isoform X3	6	0.875531	0.989692	A0A1U8CPV2	Custom	http://www.uniprot.org/uniprot/A0A1U8CPV2	Col4a5	Membrane	Type IV collagen is the major structural component of glomerular basement membranes (GBM), forming a 'chicken-wire' meshwork together with laminins, proteoglycans and entactin/nidogen.
microtubule-associated protein 6	2	0.746487	0.989895	A0A3Q0CY40	Custom	http://www.uniprot.org/uniprot/A0A3Q0CY40	Map6	Cytoplasm
Angiotensin-converting enzyme	1	0.773643	0.990356	A0A3Q0CPJ2	Custom	http://www.uniprot.org/uniprot/A0A3Q0CPJ2	LOC101824864
Phosphate carrier protein, mitochondrial	3	1.03534	0.991216	A0A3Q0CLN3	Custom	http://www.uniprot.org/uniprot/A0A3Q0CLN3	Slc25a3	Membrane
latexin	3	0.820952	0.991447	A0A1U7QP62	Custom	http://www.uniprot.org/uniprot/A0A1U7QP62	Lxn
Succinyl-CoA:3-ketoacid-coenzyme A transferase	2	0.707125	0.99438	A0A3Q0CA08	Custom	http://www.uniprot.org/uniprot/A0A3Q0CA08	Oxct1		Key enzyme for ketone body catabolism. Transfers the CoA moiety from succinate to acetoacetate. Formation of the enzyme-CoA intermediate proceeds via an unstable anhydride species formed between the carboxylate groups of the enzyme and substrate.
cysteine-rich protein 2 isoform X3	3	1.35411	0.994458	A0A1U7QKZ6	Custom	http://www.uniprot.org/uniprot/A0A1U7QKZ6	Crip2
Medium-chain specific acyl-CoA dehydrogenase, mitochondrial	3	0.94163	0.995208	A0A1U8CGI4	Custom	http://www.uniprot.org/uniprot/A0A1U8CGI4	Acadm	Mitochondrion matrix
A-kinase anchor protein 12 isoform X2	9	1.13956	0.996004	A0A1U8BDX2	Custom	http://www.uniprot.org/uniprot/A0A1U8BDX2	Akap12	Membrane
Macrophage-capping protein	2	1.02875	0.997434	A0A1U7QSM1	Custom	http://www.uniprot.org/uniprot/A0A1U7QSM1	Capg	Cell projection	Calcium-sensitive protein which reversibly blocks the barbed ends of actin filaments but does not sever preformed actin filaments. May play an important role in macrophage function. May play a role in regulating cytoplasmic and/or nuclear structures through potential interactions with actin. May bind DNA.
Coronin	2	0.946277	0.997469	A0A1U8CAN2	Custom	http://www.uniprot.org/uniprot/A0A1U8CAN2	Coro1b	Cytoplasm	Regulates leading edge dynamics and cell motility in fibroblasts. May be involved in cytokinesis and signal transduction.
L-xylulose reductase-like isoform X1	1	0.946943	0.999023	A0A3Q0CRI4	Custom	http://www.uniprot.org/uniprot/A0A3Q0CRI4	LOC106021445
