# Supplementary material for: HIF-1α-Dependent Metabolic Reprogramming, Oxidative Stress, and Bioenergetic Dysfunction in SARS-CoV-2-Infected Hamsters
Source: Int J Mol Sci. 2022 Dec 29;24(1):558. doi: 10.3390/ijms24010558 (PMC9820273; doi:10.3390/ijms24010558)
Supplement: Supplementary file 1 [file ijms-24-00558-s001.zip › Supplemental Table 2.xlsx]

## Sheet: Sheet1
red cells are where ratio trends did not agree	Protein	Current study # Peptides Quantified	Current study Avg Ratio (infected/control)	Current study P-value	Abundance ratio Suresh COVID infected 4dpi/4 dpi mock infected	Accession	Species	Hyperlink	Gene	Subcellular Location	Function	Comments
	Myxovirus resistance protein 2	12	#DIV/0!	0.00114406	4.218	B2Z890	Custom	http://www.uniprot.org/uniprot/B2Z890	Mx2
	Superoxide dismutase	4	#DIV/0!	0.00197689	5.493	A0A1U7QH60	Custom	http://www.uniprot.org/uniprot/A0A1U7QH60	Sod2	Mitochondrion matrix	Destroys radicals which are normally produced within the cells and which are toxic to biological systems.
	Myoglobin	6	#DIV/0!	0.00601847	3.471	A0A1U7QU54	Custom	http://www.uniprot.org/uniprot/A0A1U7QU54	Mb		Serves as a reserve supply of oxygen and facilitates the movement of oxygen within muscles.
	four and a half LIM domains protein 1 isoform X4	9	0.203464	0.01055	0.799	A0A1U7R2T5	Custom	http://www.uniprot.org/uniprot/A0A1U7R2T5	Fhl1
	Fibrinogen alpha chain	7	5.7917	0.0107337	2.944	A0A1U7QP17	Custom	http://www.uniprot.org/uniprot/A0A1U7QP17	Fga	Secreted
	retinal dehydrogenase 1	33	0.342171	0.0108028	0.701	A0A1U7QDB4	Custom	http://www.uniprot.org/uniprot/A0A1U7QDB4	LOC101822890
	fibrinogen gamma chain isoform X2	12	5.03152	0.0122371	3.765	A0A1U7QZA0	Custom	http://www.uniprot.org/uniprot/A0A1U7QZA0	Fgg	Secreted
	Xanthine dehydrogenase	9	3.11163	0.0398969	1.46	A0A1U7QV01	Custom	http://www.uniprot.org/uniprot/A0A1U7QV01	Xdh	Cytoplasm
	rano class II histocompatibility antigen, A beta chain-like	3	15.351	0.0437152	1.375	A0A1U7RGM3	Custom	http://www.uniprot.org/uniprot/A0A1U7RGM3	LOC101834868	Membrane
	Haptoglobin	17	7.84794	0.0538832	4.575	A0A1U7Q238	Custom	http://www.uniprot.org/uniprot/A0A1U7Q238	Hp		As a result of hemolysis, hemoglobin is found to accumulate in the kidney and is secreted in the urine. Haptoglobin captures, and combines with free plasma hemoglobin to allow hepatic recycling of heme iron and to prevent kidney damage. Haptoglobin also acts as an antioxidant, has antibacterial activity and plays a role in modulating many aspects of the acute phase response. Hemoglobin/haptoglobi…
	selenium-binding protein 1	34	0.393669	0.0546534	0.749	A0A1U8CT86	Custom	http://www.uniprot.org/uniprot/A0A1U8CT86	LOC106023276
	aldehyde dehydrogenase, mitochondrial	17	0.172895	0.0670542	0.733	A0A1U7QWP4	Custom	http://www.uniprot.org/uniprot/A0A1U7QWP4	Aldh2
	retinoic acid-induced protein 3	6	0.358588	0.070516	0.616	A0A1U7Q8K6	Custom	http://www.uniprot.org/uniprot/A0A1U7Q8K6	Gprc5a	Cell membrane
	C3/C5 convertase	18	4.20427	0.0725804	1.756	A0A1U7RGK9	Custom	http://www.uniprot.org/uniprot/A0A1U7RGK9	Cfb	Secreted
	Gc-globulin	24	2.46938	0.0745273	1.905	A0A1U8BMS0	Custom	http://www.uniprot.org/uniprot/A0A1U8BMS0	Gc	Secreted	Involved in vitamin D transport and storage, scavenging of extracellular G-actin, enhancement of the chemotactic activity of C5 alpha for neutrophils in inflammation and macrophage activation.
	Transgelin	5	2.12634	0.088017	0.702	A0A1U8BXX5	Custom	http://www.uniprot.org/uniprot/A0A1U8BXX5	Tagln
	Fibrinogen beta chain	14	3.64463	0.0941839	3.217	A0A1U7QCL5	Custom	http://www.uniprot.org/uniprot/A0A1U7QCL5	Fgb	Secreted
	histidine-rich glycoprotein	3	62.8862	0.0972218	1.231	A0A1U7QP95	Custom	http://www.uniprot.org/uniprot/A0A1U7QP95	Hrg
	Decorin	2	42.8506	0.102817	0.781	A0A1U8BM80	Custom	http://www.uniprot.org/uniprot/A0A1U8BM80	Dcn	Secreted	May affect the rate of fibrils formation.
	fetuin-B	13	3.19541	0.103633	1.812	A0A1U7QP51	Custom	http://www.uniprot.org/uniprot/A0A1U7QP51	Fetub	Secreted
	caldesmon	2	0.0317186	0.109326	0.757	A0A3Q0D9S4	Custom	http://www.uniprot.org/uniprot/A0A3Q0D9S4	Cald1
	Glutathione transferase	4	46.7125	0.110397	0.67	A0A1U7R5S8	Custom	http://www.uniprot.org/uniprot/A0A1U7R5S8	LOC101822730	Cytoplasm
	Galectin	3	55.6785	0.119878	1.312	A0A1U7R1X7	Custom	http://www.uniprot.org/uniprot/A0A1U7R1X7	Lgals3	Cytoplasm
	Ferritin	3	43.4934	0.12369	2.426	A0A1U7QB70	Custom	http://www.uniprot.org/uniprot/A0A1U7QB70	Fth1		Stores iron in a soluble, non-toxic, readily available form. Important for iron homeostasis. Iron is taken up in the ferrous form and deposited as ferric hydroxides after oxidation.
	15S Mg(2+)-ATPase p97 subunit	20	0.426079	0.124736	0.827	A0A1U7QTL0	Custom	http://www.uniprot.org/uniprot/A0A1U7QTL0	Vcp	Cytoplasm
	polymerase I and transcript release factor	9	0.333617	0.136664	0.689	A0A1U7QP67	Custom	http://www.uniprot.org/uniprot/A0A1U7QP67	Cavin1	Membrane
	C3-beta-c	84	2.28825	0.146291	1.808	A0A3Q0D994	Custom	http://www.uniprot.org/uniprot/A0A3Q0D994	C3	Secreted	Acts as a chemoattractant for neutrophils in chronic inflammation.
	Maillard deglycase	3	0.00788698	0.147622	0.715	A0A1U8C7F2	Custom	http://www.uniprot.org/uniprot/A0A1U8C7F2	Park7	Cell membrane
	pregnancy zone protein-like	80	2.16284	0.148571	1.505	A0A1U8CUG0	Custom	http://www.uniprot.org/uniprot/A0A1U8CUG0	LOC101844701	Secreted
	protein S100-A9	5	15.5239	0.150855	1.704	A0A1U7QW31	Custom	http://www.uniprot.org/uniprot/A0A1U7QW31	LOC101830989
	T1-TrpRS	5	9.29531	0.155933	1.994	A0A1U7Q957	Custom	http://www.uniprot.org/uniprot/A0A1U7Q957	Wars
	Adenine phosphoribosyltransferase	5	6.65031	0.16032	1.205	A0A3Q0CVK0	Custom	http://www.uniprot.org/uniprot/A0A3Q0CVK0	Aprt	Cytoplasm	Catalyzes a salvage reaction resulting in the formation of AMP, that is energically less costly than de novo synthesis.
	flavin reductase (NADPH)	7	2.98199	0.160886	0.75	A0A1U7RG83	Custom	http://www.uniprot.org/uniprot/A0A1U7RG83	Blvrb
	Annexin	8	0.612794	0.165988	0.835	A0A1U8BR52	Custom	http://www.uniprot.org/uniprot/A0A1U8BR52	Anxa5		This protein is an anticoagulant protein that acts as an indirect inhibitor of the thromboplastin-specific complex, which is involved in the blood coagulation cascade.
	hemoglobin subunit beta	20	0.517521	0.166961	0.846	A0A3Q0CX13	Custom	http://www.uniprot.org/uniprot/A0A3Q0CX13	LOC101833678
	Glutathione S-transferase	3	#DIV/0!	0.183992	0.745	A0A1U7Q2C9	Custom	http://www.uniprot.org/uniprot/A0A1U7Q2C9	LOC101829268	Cytoplasm
	keratin, type II cytoskeletal 8	6	0.32335	0.185101	0.778	A0A1U7QH04	Custom	http://www.uniprot.org/uniprot/A0A1U7QH04	Krt8
	peptidyl-prolyl cis-trans isomerase A	2	#DIV/0!	0.185315	0.794	A0A1U7RE28	Custom	http://www.uniprot.org/uniprot/A0A1U7RE28	Ppia
	Tubulin polymerization-promoting protein family member 3	3	#DIV/0!	0.190026	0.567	A0A1U7QZG6	Custom	http://www.uniprot.org/uniprot/A0A1U7QZG6	Tppp3	Cytoplasm
	2-phospho-D-glycerate hydro-lyase	19	0.632783	0.193084	1.135	A0A3Q0D5K3	Custom	http://www.uniprot.org/uniprot/A0A3Q0D5K3	Eno1
	apolipoprotein A-I precursor	13	5.30327	0.198078	2.056	A0A1U7Q2B6	Custom	http://www.uniprot.org/uniprot/A0A1U7Q2B6	Apoa1	Secreted
	laminin subunit gamma-1	23	0.330252	0.257952	0.71	A0A1U7QD11	Custom	http://www.uniprot.org/uniprot/A0A1U7QD11	Lamc1	Membrane
	Galectin-3-binding protein	8	14.1005	0.261917	2.071	A0A1U7Q3N9	Custom	http://www.uniprot.org/uniprot/A0A1U7Q3N9	Lgals3bp	Secreted
	talin-1	67	0.457222	0.263662	0.83	A0A1U7R141	Custom	http://www.uniprot.org/uniprot/A0A1U7R141	Tln1	Cytoplasm
	spectrin alpha chain, erythrocytic 1	10	0.32395	0.265179	0.809	A0A1U7R2R1	Custom	http://www.uniprot.org/uniprot/A0A1U7R2R1	Spta1
	advanced glycosylation end product-specific receptor	14	0.653347	0.286865	0.737	A0A1U8CP48	Custom	http://www.uniprot.org/uniprot/A0A1U8CP48	Ager
	immunoglobulin lambda-1 light chain-like isoform X4	2	8.83121	0.293703	1.284	A0A3Q0D3A4	Custom	http://www.uniprot.org/uniprot/A0A3Q0D3A4	LOC101841371
	Clathrin heavy chain	23	0.414308	0.310047	0.919	A0A1U7QDR7	Custom	http://www.uniprot.org/uniprot/A0A1U7QDR7	Cltc	Cytoplasmic vesicle membrane	Clathrin is the major protein of the polyhedral coat of coated pits and vesicles.
	LOW QUALITY PROTEIN: myosin-14	35	0.416958	0.314197	0.713	A0A3Q0DF64	Custom	http://www.uniprot.org/uniprot/A0A3Q0DF64	Myh14
	Vimentin	41	0.584768	0.31753	0.904	A0A1U7QL88	Custom	http://www.uniprot.org/uniprot/A0A1U7QL88	Vim	Cell membrane	Involved with LARP6 in the stabilization of type I collagen mRNAs for CO1A1 and CO1A2.
	myosin-11	4	0.28329	0.31895	0.672	A0A3Q0D2E6	Custom	http://www.uniprot.org/uniprot/A0A3Q0D2E6	Myh11
	myosin-10	18	0.143217	0.326189	0.712	A0A1U7QA56	Custom	http://www.uniprot.org/uniprot/A0A1U7QA56	Myh10
	thioredoxin-dependent peroxide reductase, mitochondrial	3	4.96013	0.342503	0.64	A0A1U7RE88	Custom	http://www.uniprot.org/uniprot/A0A1U7RE88	Prdx3	Cytoplasm
	hydroxyacyl-coenzyme A dehydrogenase, mitochondrial	2	3.49762	0.354367	0.66	A0A3Q0DC82	Custom	http://www.uniprot.org/uniprot/A0A3Q0DC82	Hadh
	Cell division control protein 42 homolog	6	1.66216	0.397392	0.855	A0A1U7QUA0	Custom	http://www.uniprot.org/uniprot/A0A1U7QUA0	Cdc42	Cell membrane	Plasma membrane-associated small GTPase which cycles between an active GTP-bound and an inactive GDP-bound state.
	lipoma-preferred partner homolog	3	0.032373	0.403057	0.603	A0A1U7Q7E8	Custom	http://www.uniprot.org/uniprot/A0A1U7Q7E8	LOC101828273
	Chloride intracellular channel protein	6	1.42382	0.404051	0.63	A0A3Q0CNL7	Custom	http://www.uniprot.org/uniprot/A0A3Q0CNL7	Clic5	Membrane
	interferon-inducible GTPase 1-like	2	#DIV/0!	0.42265	2.074	A0A1U7RG56	Custom	http://www.uniprot.org/uniprot/A0A1U7RG56	LOC101838193
	keratin, type II cytoskeletal 7	9	0.676337	0.429727	0.793	A0A1U7Q9T5	Custom	http://www.uniprot.org/uniprot/A0A1U7Q9T5	LOC101833224
	Glycoprotein IIIb	4	1.3161	0.452307	0.882	A0A1U8CM00	Custom	http://www.uniprot.org/uniprot/A0A1U8CM00	Cd36	Apical cell membrane
	aldose reductase	8	0.819874	0.481291	0.749	A0A1U7R9F1	Custom	http://www.uniprot.org/uniprot/A0A1U7R9F1	Akr1b1
	serum albumin precursor	115	1.19897	0.489391	1.986	A0A1U7Q2I1	Custom	http://www.uniprot.org/uniprot/A0A1U7Q2I1	Alb	Secreted
	unconventional myosin-Ic	8	0.916171	0.502478	0.806	A0A3Q0CKS1	Custom	http://www.uniprot.org/uniprot/A0A3Q0CKS1	Myo1c
	histone H1.0	2	0.407919	0.516213	0.713	A0A1U8BG52	Custom	http://www.uniprot.org/uniprot/A0A1U8BG52	LOC101827473	Nucleus
	serotransferrin	86	1.39593	0.552625	2.179	A0A1U8BSW4	Custom	http://www.uniprot.org/uniprot/A0A1U8BSW4	LOC101828182
	basement membrane-specific heparan sulfate proteoglycan core protein	43	0.61641	0.55908	0.96	A0A3Q0D8D0	Custom	http://www.uniprot.org/uniprot/A0A3Q0D8D0	Hspg2	Membrane
	laminin subunit alpha-5	15	0.794863	0.572741	0.726	A0A1U7QLD6	Custom	http://www.uniprot.org/uniprot/A0A1U7QLD6	Lama5	Membrane
	Collagen type VI alpha 1 subunit	27	0.777378	0.651657	0.843	D0G6X1	Custom	http://www.uniprot.org/uniprot/D0G6X1	COL6A1
	Histone H4	7	0.706378	0.661169	1.355	A0A1U7QTV0	Custom	http://www.uniprot.org/uniprot/A0A1U7QTV0	LOC101825928	Chromosome	Core component of nucleosome. Nucleosomes wrap and compact DNA into chromatin, limiting DNA accessibility to the cellular machineries which require DNA as a template. Histones thereby play a central role in transcription regulation, DNA repair, DNA replication and chromosomal stability. DNA accessibility is regulated via a complex set of post-translational modifications of histones, also called h…
	collagen alpha-2(I) chain	11	4.33624	0.677317	0.533	A0A1U7R801	Custom	http://www.uniprot.org/uniprot/A0A1U7R801	Col1a2
	laminin subunit beta-2 isoform X3	30	0.911569	0.789122	0.706	A0A1U8BYW4	Custom	http://www.uniprot.org/uniprot/A0A1U8BYW4	Lamb2	Membrane
	cytoplasmic dynein 1 heavy chain 1	12	0.637782	0.818189	0.856	A0A3Q0CM76	Custom	http://www.uniprot.org/uniprot/A0A3Q0CM76	Dync1h1
	heat shock cognate 71 kDa protein	27	0.997834	0.857084	1.111	A0A1U8BQW6	Custom	http://www.uniprot.org/uniprot/A0A1U8BQW6	Hspa8
	Collagen type VI alpha 3 subunit	71	0.838961	0.858447	0.793	D0G7D9	Custom	http://www.uniprot.org/uniprot/D0G7D9	COL6A3
	Caveolin	7	0.474817	0.935466	0.707	A0A1U7R4Q2	Custom	http://www.uniprot.org/uniprot/A0A1U7R4Q2	Cav1	Cell membrane	May act as a scaffolding protein within caveolar membranes. Interacts directly with G-protein alpha subunits and can functionally regulate their activity.
	Spectrin beta chain	5	1.09627	0.966149	0.847	A0A1U7QBK2	Custom	http://www.uniprot.org/uniprot/A0A1U7QBK2	Sptbn1
	pulmonary surfactant-associated protein D isoform X3	4	1.01852	0.973958	0.675	A0A1U8CAZ6	Custom	http://www.uniprot.org/uniprot/A0A1U8CAZ6	Sftpd
	Medium-chain specific acyl-CoA dehydrogenase, mitochondrial	3	0.94163	0.995208	0.765	A0A1U8CGI4	Custom	http://www.uniprot.org/uniprot/A0A1U8CGI4	Acadm	Mitochondrion matrix
