# Supplementary material for: HIF-1α-Dependent Metabolic Reprogramming, Oxidative Stress, and Bioenergetic Dysfunction in SARS-CoV-2-Infected Hamsters
Source: Int J Mol Sci. 2022 Dec 29;24(1):558. doi: 10.3390/ijms24010558 (PMC9820273; doi:10.3390/ijms24010558)
Supplement: Supplementary file 1 [file ijms-24-00558-s001.zip › Supplemental Table 3.xlsx]

## Sheet: Sheet1
red cells are where ratio trends did not agree	Protein	Current study # Peptides Quantified	Current study Avg Ratio (infected/control)	Current study P-value	Abundance ratio Suresh COVID infected 4dpi/4 dpi mock infected	Accession	Species	Hyperlink	Gene	Subcellular Location	Function	Comments
	Septin	3	0	2.1523e-05	0.898	A0A1U8C353	Custom	http://www.uniprot.org/uniprot/A0A1U8C353	44441	Cell projection	Filament-forming cytoskeletal GTPase.
	Glutathione transferase (Fragment)	2	0	6.29997e-05	not quantified	E2GMU9	Custom	http://www.uniprot.org/uniprot/E2GMU9
	collagen alpha-1(X) chain	2	#DIV/0!	0.000266615	not quantified	A0A1U8C6Q8	Custom	http://www.uniprot.org/uniprot/A0A1U8C6Q8	Col10a1
	RNA-binding protein 33 isoform X4	2	0	0.000302587	not quantified	A0A1U8CUS8	Custom	http://www.uniprot.org/uniprot/A0A1U8CUS8	Rbm33
	Proteasome subunit alpha type	2	0	0.000507761	0.834	A0A1U7QGL6	Custom	http://www.uniprot.org/uniprot/A0A1U7QGL6	Psma2	Cytoplasm
	band 4.1-like protein 2 isoform X18	1	0	0.000590306	not quantified	A0A3Q0CG92	Custom	http://www.uniprot.org/uniprot/A0A3Q0CG92	Epb41l2
	inter-alpha-trypsin inhibitor heavy chain H1-like	5	#DIV/0!	0.000810411	not quantified	A0A3Q0DHA7	Custom	http://www.uniprot.org/uniprot/A0A3Q0DHA7	LOC106022424
	Glutathione S-transferase	2	#DIV/0!	0.000880459	0.641	A0A1U7QZZ0	Custom	http://www.uniprot.org/uniprot/A0A1U7QZZ0	Gstm3	Cytoplasm
	apolipoprotein E	2	#DIV/0!	0.000903634	0.744	A0A1U7QUL7	Custom	http://www.uniprot.org/uniprot/A0A1U7QUL7	Apoe	Secreted
	RNA helicase	3	#DIV/0!	0.0010503	1.049	A0A1U8BV28	Custom	http://www.uniprot.org/uniprot/A0A1U8BV28	Eif4a1
	ADP/ATP translocase	3	0	0.00108522	not quantified	A0A1U7QFU8	Custom	http://www.uniprot.org/uniprot/A0A1U7QFU8	Slc25a4	Membrane	Catalyzes the exchange of ADP and ATP across the membrane.
	Sorting nexin	2	0	0.00108983	1.023	A0A3Q0CPZ2	Custom	http://www.uniprot.org/uniprot/A0A3Q0CPZ2	Snx5		Involved in several stages of intracellular trafficking.
	Myxovirus resistance protein 2	12	#DIV/0!	0.00114406	4.218	B2Z890	Custom	http://www.uniprot.org/uniprot/B2Z890	Mx2
	15-hydroxyprostaglandin dehydrogenase [NAD(+)]	2	#DIV/0!	0.00114943	0.872	A0A3Q0CYX1	Custom	http://www.uniprot.org/uniprot/A0A3Q0CYX1	Hpgd
	Amine oxidase	7	0.195615	0.00169277	not quantified	A0A1U8BZE7	Custom	http://www.uniprot.org/uniprot/A0A1U8BZE7	LOC101827582
	phosphoglucomutase-like protein 5	4	0	0.00188618	0.814	A0A1U7QB05	Custom	http://www.uniprot.org/uniprot/A0A1U7QB05	Pgm5
	Formylglycinamide ribonucleotide amidotransferase	3	0	0.00192989	not quantified	A0A1U7Q494	Custom	http://www.uniprot.org/uniprot/A0A1U7Q494	Pfas
	Superoxide dismutase	4	#DIV/0!	0.00197689	5.493	A0A1U7QH60	Custom	http://www.uniprot.org/uniprot/A0A1U7QH60	Sod2	Mitochondrion matrix	Destroys radicals which are normally produced within the cells and which are toxic to biological systems.
	Podocalyxin	2	0	0.00232817	0.713	A0A1U8CYQ4	Custom	http://www.uniprot.org/uniprot/A0A1U8CYQ4	Podxl	Apical cell membrane	Involved in the regulation of both adhesion and cell morphology and cancer progression. Functions as an anti-adhesive molecule that maintains an open filtration pathway between neighboring foot processes in the podocyte by charge repulsion. Acts as a pro-adhesive molecule, enhancing the adherence of cells to immobilized ligands, increasing the rate of migration and cell-cell contacts in an integr…
	Inositol-1-monophosphatase	2	#DIV/0!	0.00251391	0.965	A0A1U7QIL1	Custom	http://www.uniprot.org/uniprot/A0A1U7QIL1	Impa1
	sickle tail protein homolog isoform X16	2	0	0.00297572	not quantified	A0A1U8CEZ0	Custom	http://www.uniprot.org/uniprot/A0A1U8CEZ0	Kiaa1217
	myosin light polypeptide 6 isoform X2	4	#DIV/0!	0.00315033	not quantified	A0A1U7QV29	Custom	http://www.uniprot.org/uniprot/A0A1U7QV29	Myl6
	keratin, type I cytoskeletal 19 isoform X2	1	#DIV/0!	0.00359292	not quantified	A0A3Q0CFZ2	Custom	http://www.uniprot.org/uniprot/A0A3Q0CFZ2	Krt19
	transmembrane protein 132A isoform X2	1	#DIV/0!	0.00371932	not quantified	A0A1U7Q4S7	Custom	http://www.uniprot.org/uniprot/A0A1U7Q4S7	Tmem132a	Membrane
	Protein S100	2	3.48493	0.00400643	1.322	A0A1U7R695	Custom	http://www.uniprot.org/uniprot/A0A1U7R695	S100a11		Facilitates the differentiation and the cornification of keratinocytes.
	Reticulon	3	0	0.00408839	0.762	A0A1U7QE52	Custom	http://www.uniprot.org/uniprot/A0A1U7QE52	Rtn4	Endoplasmic reticulum membrane
	Rab GDP dissociation inhibitor	2	0.070222	0.00480275	0.895	A0A1U7QDS7	Custom	http://www.uniprot.org/uniprot/A0A1U7QDS7	Gdi2	Cytoplasm	Regulates the GDP/GTP exchange reaction of most RAB proteins by inhibiting the dissociation of GDP from them, and the subsequent binding of GTP.
	guanylate-binding protein 5	2	#DIV/0!	0.00498008	not quantified	A0A1U8CCZ4	Custom	http://www.uniprot.org/uniprot/A0A1U8CCZ4	LOC106022099
	Fatty acid binding protein 4 (Fragment)	4	#DIV/0!	0.00580766	not quantified	Q5UCA1	Custom	http://www.uniprot.org/uniprot/Q5UCA1	FABP4
	Myoglobin	6	#DIV/0!	0.00601847	3.471	A0A1U7QU54	Custom	http://www.uniprot.org/uniprot/A0A1U7QU54	Mb		Serves as a reserve supply of oxygen and facilitates the movement of oxygen within muscles.
	Glyceraldehyde-3-phosphate dehydrogenase (Fragment)	11	0.357973	0.00632279	not quantified	Q0QET9	Custom	http://www.uniprot.org/uniprot/Q0QET9	GAPDH
	WD repeat-containing protein 1	11	0.225529	0.00717033	0.953	A0A1U7QJG0	Custom	http://www.uniprot.org/uniprot/A0A1U7QJG0	Wdr1
	protein SET	2	#DIV/0!	0.00727841	0.999	A0A1U7R6E4	Custom	http://www.uniprot.org/uniprot/A0A1U7R6E4	LOC101831694
	guanine nucleotide-binding protein G(I) subunit alpha-2	4	#DIV/0!	0.00820876	1.056	A0A1U7QAT2	Custom	http://www.uniprot.org/uniprot/A0A1U7QAT2	Gnai2
	78 kDa glucose-regulated protein	20	0.300026	0.0100003	1.044	A0A1U8CDJ8	Custom	http://www.uniprot.org/uniprot/A0A1U8CDJ8	Hspa5	Endoplasmic reticulum lumen
	Adenosylhomocysteinase	10	0.0215711	0.0104422	0.75	A0A1U7RAJ1	Custom	http://www.uniprot.org/uniprot/A0A1U7RAJ1	Ahcy
	four and a half LIM domains protein 1 isoform X4	9	0.203464	0.01055	0.799	A0A1U7R2T5	Custom	http://www.uniprot.org/uniprot/A0A1U7R2T5	Fhl1
	Fibrinogen alpha chain	7	5.7917	0.0107337	2.944	A0A1U7QP17	Custom	http://www.uniprot.org/uniprot/A0A1U7QP17	Fga	Secreted
	retinal dehydrogenase 1	33	0.342171	0.0108028	0.701	A0A1U7QDB4	Custom	http://www.uniprot.org/uniprot/A0A1U7QDB4	LOC101822890
	C4a anaphylatoxin	33	2.74568	0.0115877	not quantified	A0A1U7RGL4	Custom	http://www.uniprot.org/uniprot/A0A1U7RGL4	LOC101830930	Cell junction
	fibrinogen gamma chain isoform X2	12	5.03152	0.0122371	3.765	A0A1U7QZA0	Custom	http://www.uniprot.org/uniprot/A0A1U7QZA0	Fgg	Secreted
	ATP synthase subunit alpha	21	0.228254	0.0138473	0.969	F1T2M2	Custom	http://www.uniprot.org/uniprot/F1T2M2	atp5a1	Cell membrane	Produces ATP from ADP in the presence of a proton gradient across the membrane.
	Hemopexin	18	5.69003	0.0143864	3.096	A0A1U7RF88	Custom	http://www.uniprot.org/uniprot/A0A1U7RF88	Hpx	Secreted	Binds heme and transports it to the liver for breakdown and iron recovery, after which the free hemopexin returns to the circulation.
	kininogen-1 isoform X2	13	3.29151	0.0164941	not quantified	A0A1U8BRY4	Custom	http://www.uniprot.org/uniprot/A0A1U8BRY4	Kng1	Secreted
	Glutamate dehydrogenase (NAD(P)(+))	10	0.0800324	0.0173818	0.865	A0A1U7QZ08	Custom	http://www.uniprot.org/uniprot/A0A1U7QZ08	Glud1
	vitronectin	4	2.63901	0.0190277	1.483	A0A1U7QY02	Custom	http://www.uniprot.org/uniprot/A0A1U7QY02	Vtn
	Dihydrolipoyllysine-residue succinyltransferase component of 2-oxoglutarate dehydrogenase complex, mitochondrial	4	0.0443337	0.0225259	0.835	A0A1U7QUP4	Custom	http://www.uniprot.org/uniprot/A0A1U7QUP4	Dlst	Mitochondrion matrix
	SEC14-like protein 3	20	0.22509	0.0265244	0.901	A0A3Q0CNB5	Custom	http://www.uniprot.org/uniprot/A0A3Q0CNB5	LOC106021050
	alpha-actinin-4	21	0.201247	0.0315073	0.953	A0A3Q0CD83	Custom	http://www.uniprot.org/uniprot/A0A3Q0CD83	Actn4
	Alpha-1-microglobulin	5	5.6946	0.0339176	not quantified	A0A1U7QUT5	Custom	http://www.uniprot.org/uniprot/A0A1U7QUT5	Ambp	Secreted
	lactotransferrin	26	6.71902	0.0339785	1.285	A0A3Q0CY55	Custom	http://www.uniprot.org/uniprot/A0A3Q0CY55	Ltf
	L-lactate dehydrogenase	13	1.63575	0.0350071	0.826	A0A1U7Q8M1	Custom	http://www.uniprot.org/uniprot/A0A1U7Q8M1	Ldhb
	ceruloplasmin	24	6.34735	0.0355736	1.734	A0A1U7R5I7	Custom	http://www.uniprot.org/uniprot/A0A1U7R5I7	Cp
	Carboxylic ester hydrolase	23	0.333201	0.0370153	0.709	O35534	Custom	http://www.uniprot.org/uniprot/O35534	LOC101832386
	alcohol dehydrogenase 1 isoform X2	5	0.180709	0.0384232	0.899	A0A1U8CPM3	Custom	http://www.uniprot.org/uniprot/A0A1U8CPM3	LOC101823051
	inter-alpha-trypsin inhibitor heavy chain H4 isoform X4	6	8.30022	0.0391653	not quantified	A0A3Q0DF98	Custom	http://www.uniprot.org/uniprot/A0A3Q0DF98	Itih4	Secreted
	Xanthine dehydrogenase	9	3.11163	0.0398969	1.46	A0A1U7QV01	Custom	http://www.uniprot.org/uniprot/A0A1U7QV01	Xdh	Cytoplasm
	rano class II histocompatibility antigen, A beta chain-like	3	15.351	0.0437152	1.375	A0A1U7RGM3	Custom	http://www.uniprot.org/uniprot/A0A1U7RGM3	LOC101834868	Membrane
	LIM domain only protein 7 isoform X5	4	0.0583755	0.0444538	0.871	A0A3Q0CJZ8	Custom	http://www.uniprot.org/uniprot/A0A3Q0CJZ8	Lmo7
	Aldose 1-epimerase	6	0.161994	0.0460618	0.705	A0A1U7QJP2	Custom	http://www.uniprot.org/uniprot/A0A1U7QJP2	Galm		Mutarotase that catalyzes the interconversion of beta-D-galactose and alpha-D-galactose during galactose metabolism.
	Aspartate aminotransferase	8	0.357096	0.0488247	0.896	A0A1U7R0U8	Custom	http://www.uniprot.org/uniprot/A0A1U7R0U8	Got2
	Proteasome subunit alpha type	4	0.178408	0.0495973	1.259	A0A3Q0CXQ5	Custom	http://www.uniprot.org/uniprot/A0A3Q0CXQ5	Psma7	Cytoplasm
